# Supplementary material for: Enantioselective synthesis of 2,5-dihydrobenzo[b]azepine derivatives via iridium-catalyzed asymmetric allylic amination with 2-allylanilines and ring-closing-metathesis reaction
Source: Royal Society of Chemistry journal article supplement (doi:10.1039/c2ob00036a), 2012-01-01
Supplement: c2ob00036a.pdf [file c2ob00036a.pdf]

*Supporting Information for*

Enantioselective Synthesis of 2,5-Dihydrobenzo[*b*]azepine Derivatives  
via Iridium-Catalyzed Asymmetric Allylic Amination with  
2-Allylanilines and Ring-Closing-Metathesis Reaction

Ke-Yin Ye, Li-Xin Dai and Shu-Li You\*

State Key Laboratory of Organometallic Chemistry  
Shanghai Institute of Organic Chemistry, Chinese Academy of Sciences  
345 Lingling Lu, Shanghai 200032, China

E-mail: [slyou@sioc.ac.cn](mailto:slyou@sioc.ac.cn)

**Table of Contents**

|                                   |        |
|-----------------------------------|--------|
| NMR and HPLC spectra              | S2-S92 |
| X-ray of ( <i>S</i> )- <b>5ca</b> | S93    |

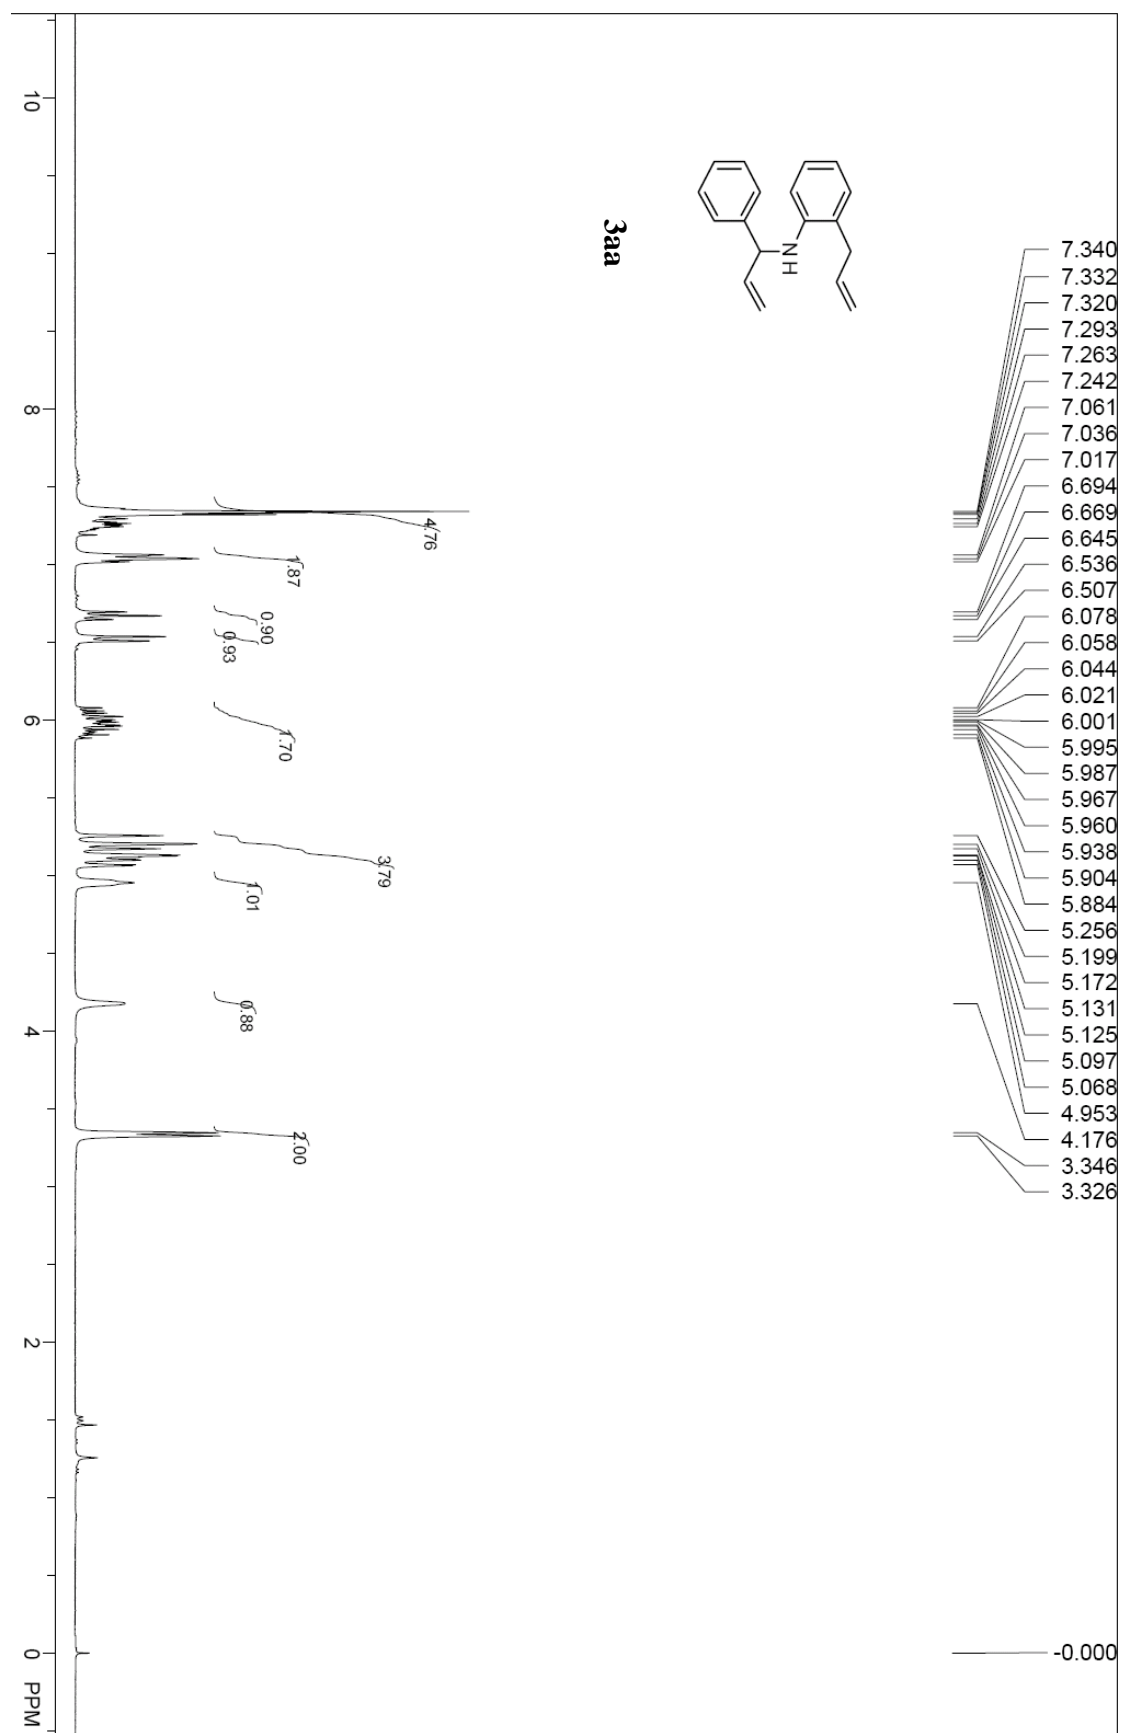

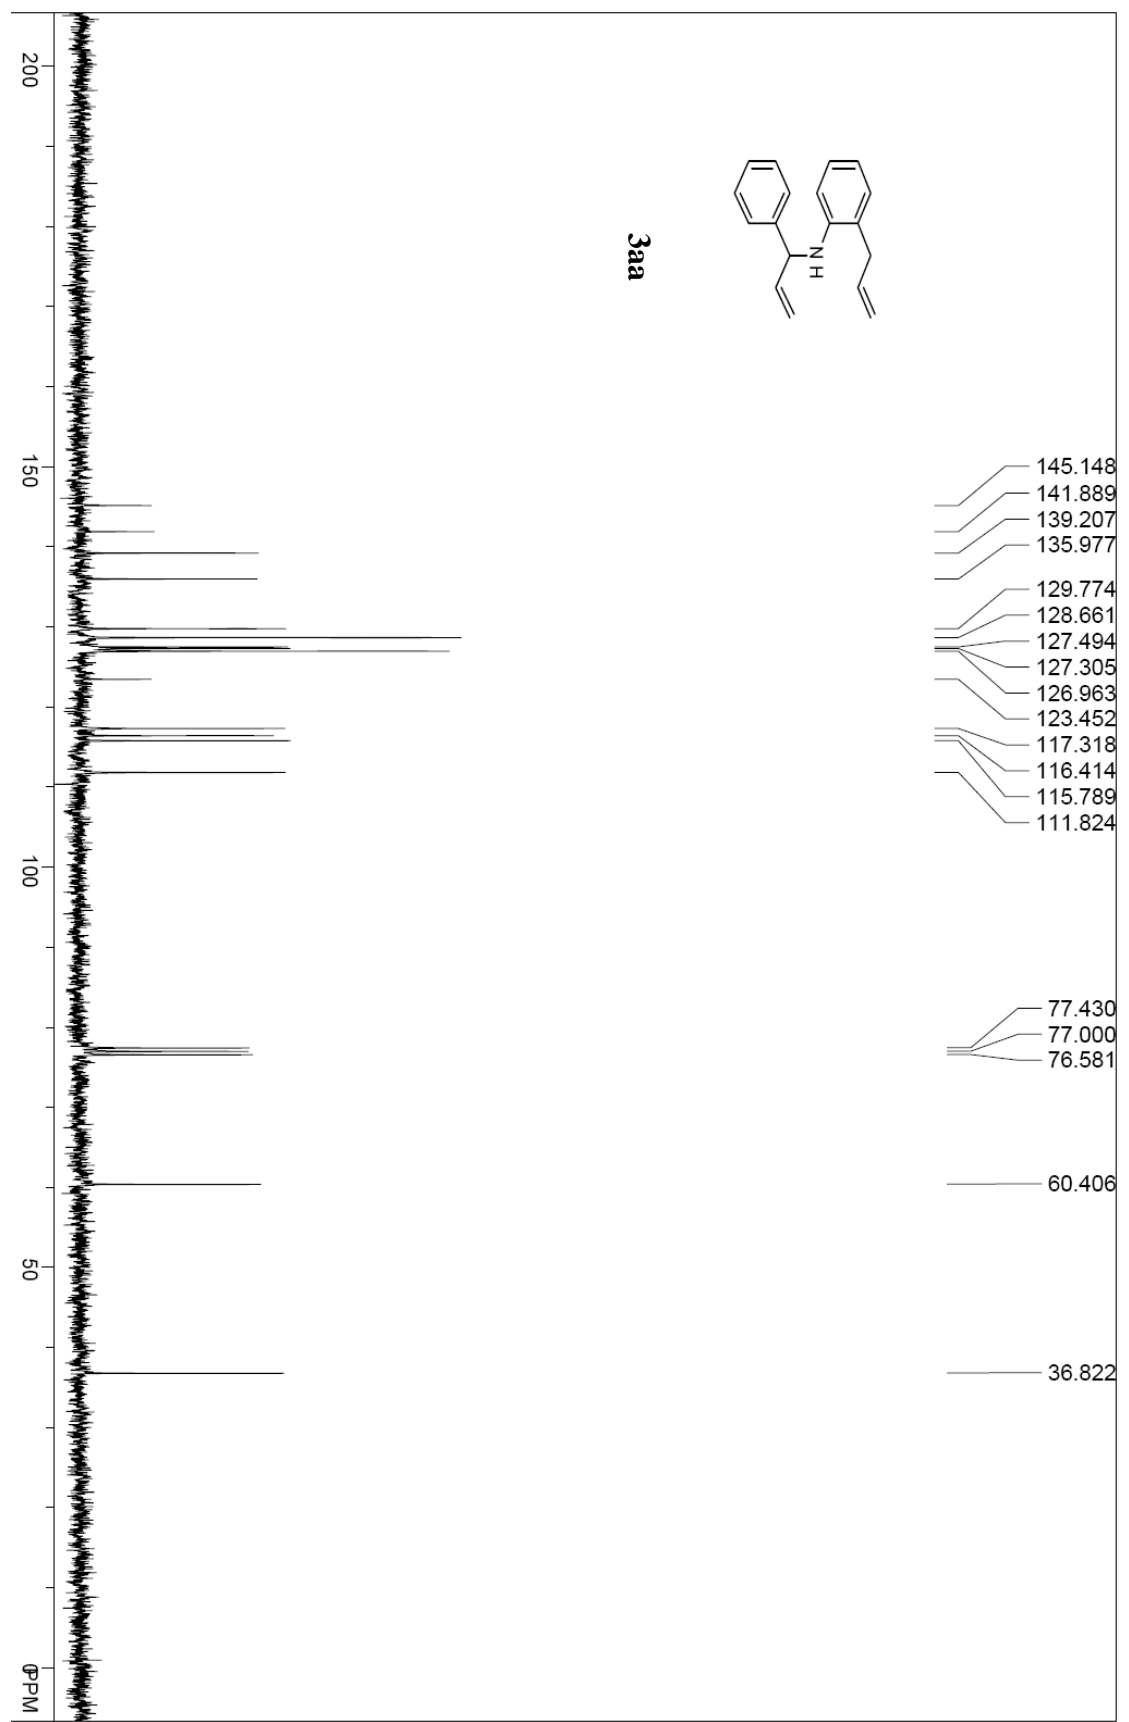

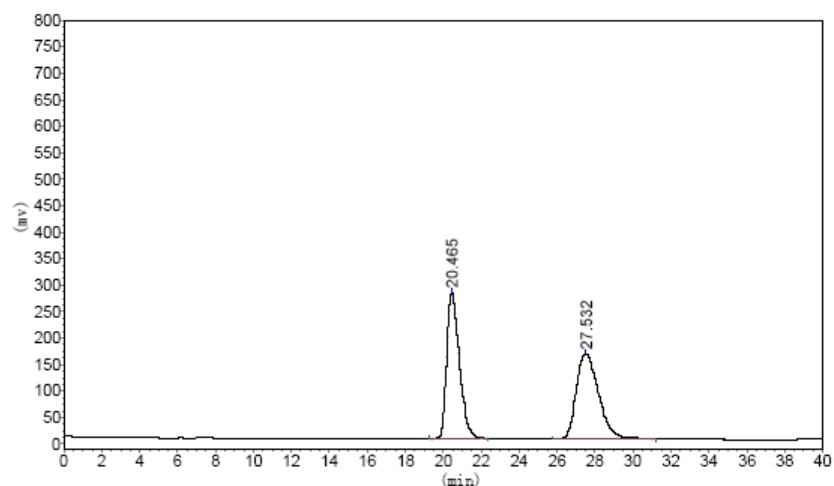

| Peak No.     | R. Time | Peak Height | Peak Area    | Percent  |
|--------------|---------|-------------|--------------|----------|
| 1            | 20.465  | 275698.500  | 12999724.000 | 49.2689  |
| 2            | 27.532  | 162010.703  | 13385504.000 | 50.7311  |
| <b>Total</b> |         | 437709.203  | 26385228.000 | 100.0000 |

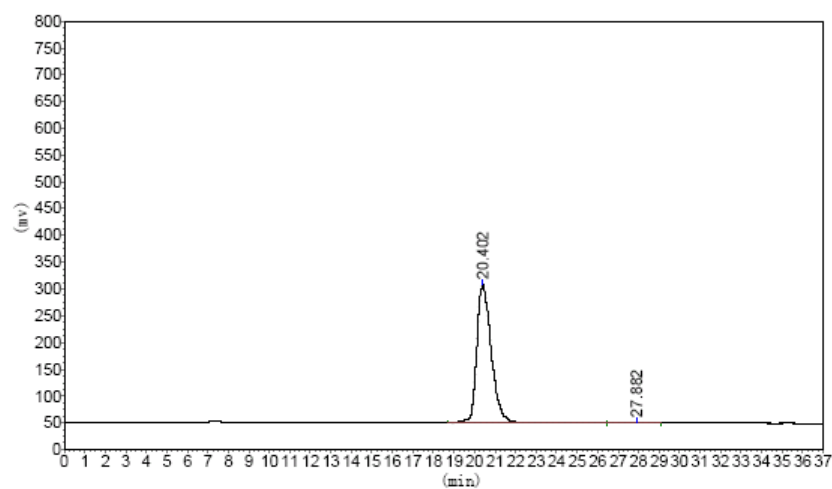

| Peak No.     | R. Time | Peak Height | Peak Area    | Percent  |
|--------------|---------|-------------|--------------|----------|
| 1            | 20.402  | 258282.938  | 12673854.000 | 99.3582  |
| 2            | 27.882  | 1121.163    | 81869.734    | 0.6418   |
| <b>Total</b> |         | 259404.101  | 12755723.734 | 100.0000 |

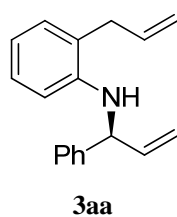

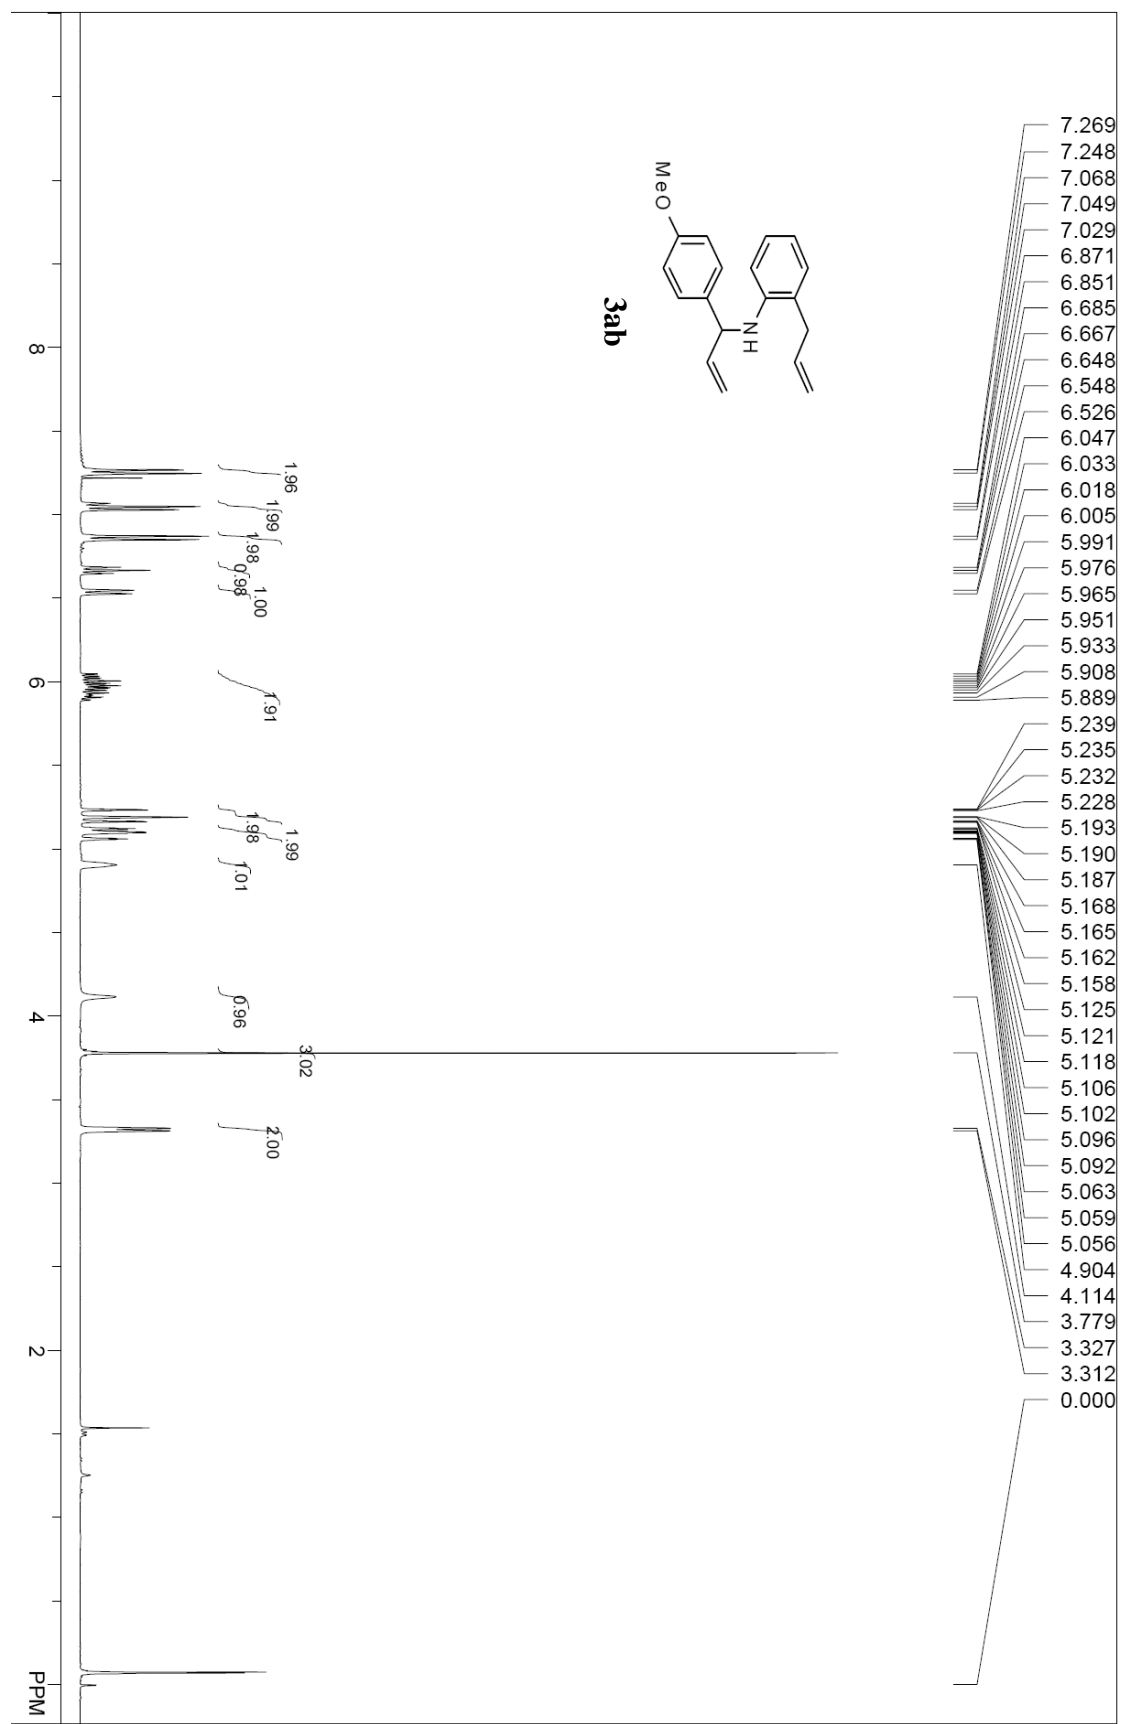

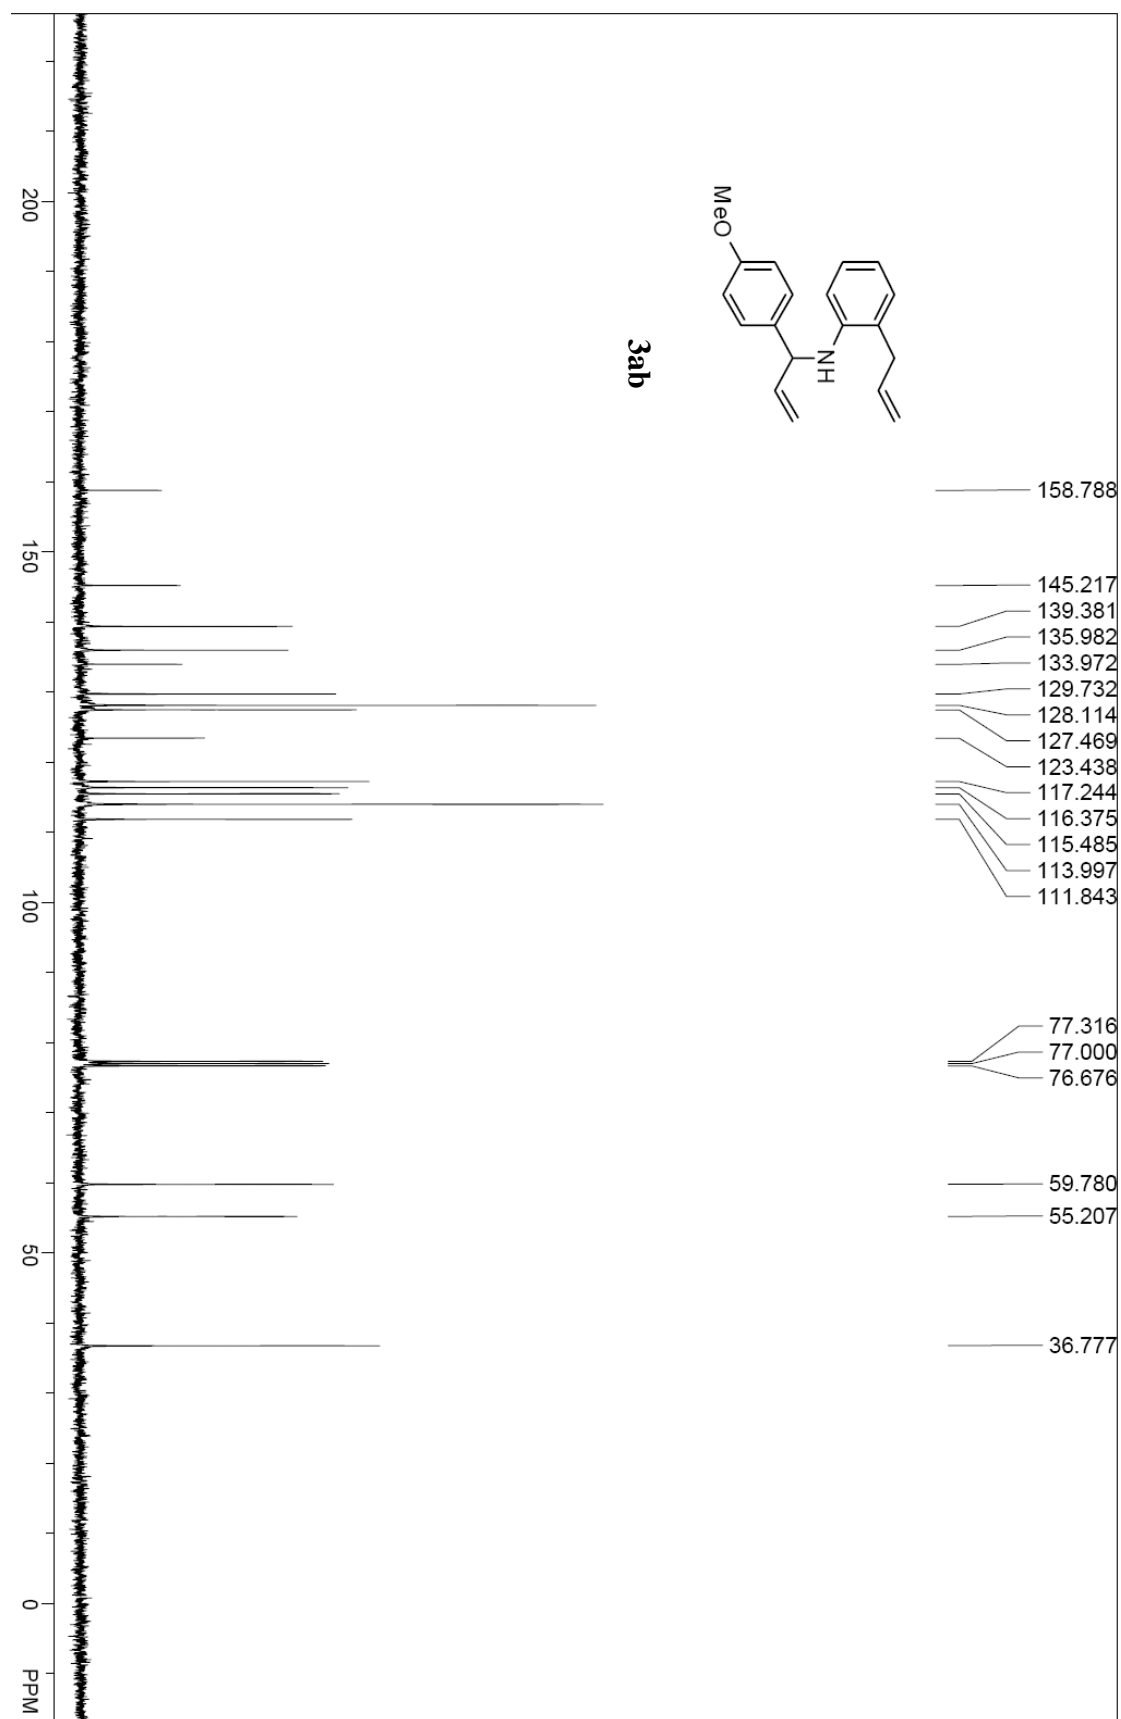

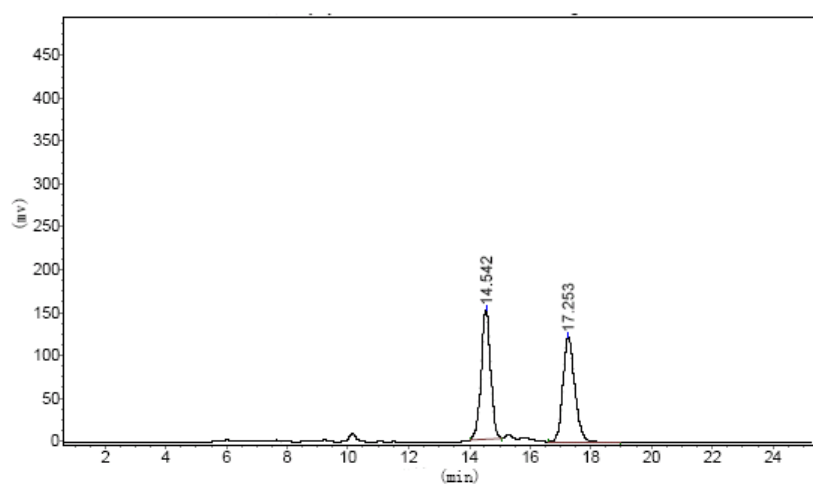

| Peak No.     | R. Time | Peak Height | Peak Area   | Percent  |
|--------------|---------|-------------|-------------|----------|
| 1            | 14.542  | 150719.859  | 3260485.500 | 49.6340  |
| 2            | 17.253  | 122385.406  | 3308565.750 | 50.3660  |
| <b>Total</b> |         | 273105.266  | 6569051.250 | 100.0000 |

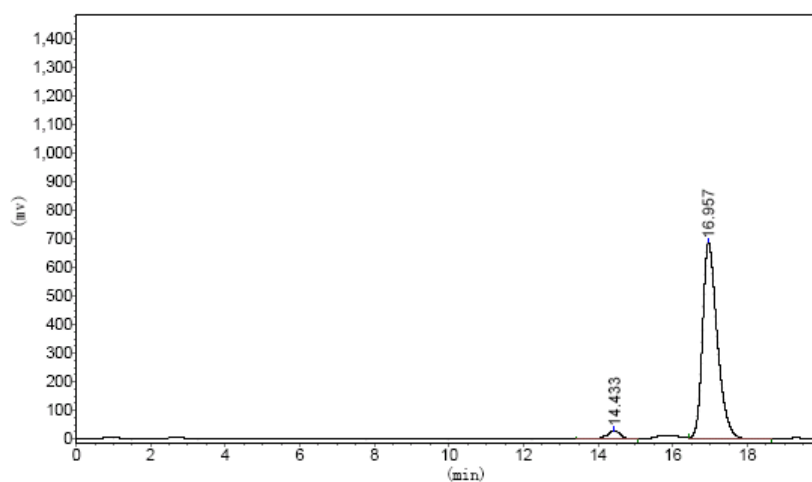

| Peak No.     | R. Time | Peak Height | Peak Area    | Percent  |
|--------------|---------|-------------|--------------|----------|
| 1            | 14.433  | 29239.289   | 769032.063   | 3.8919   |
| 2            | 16.957  | 689013.813  | 18991018.000 | 96.1081  |
| <b>Total</b> |         | 718253.102  | 19760050.063 | 100.0000 |

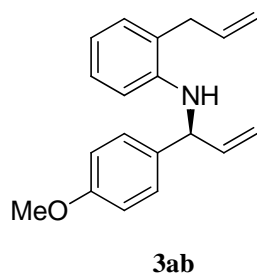

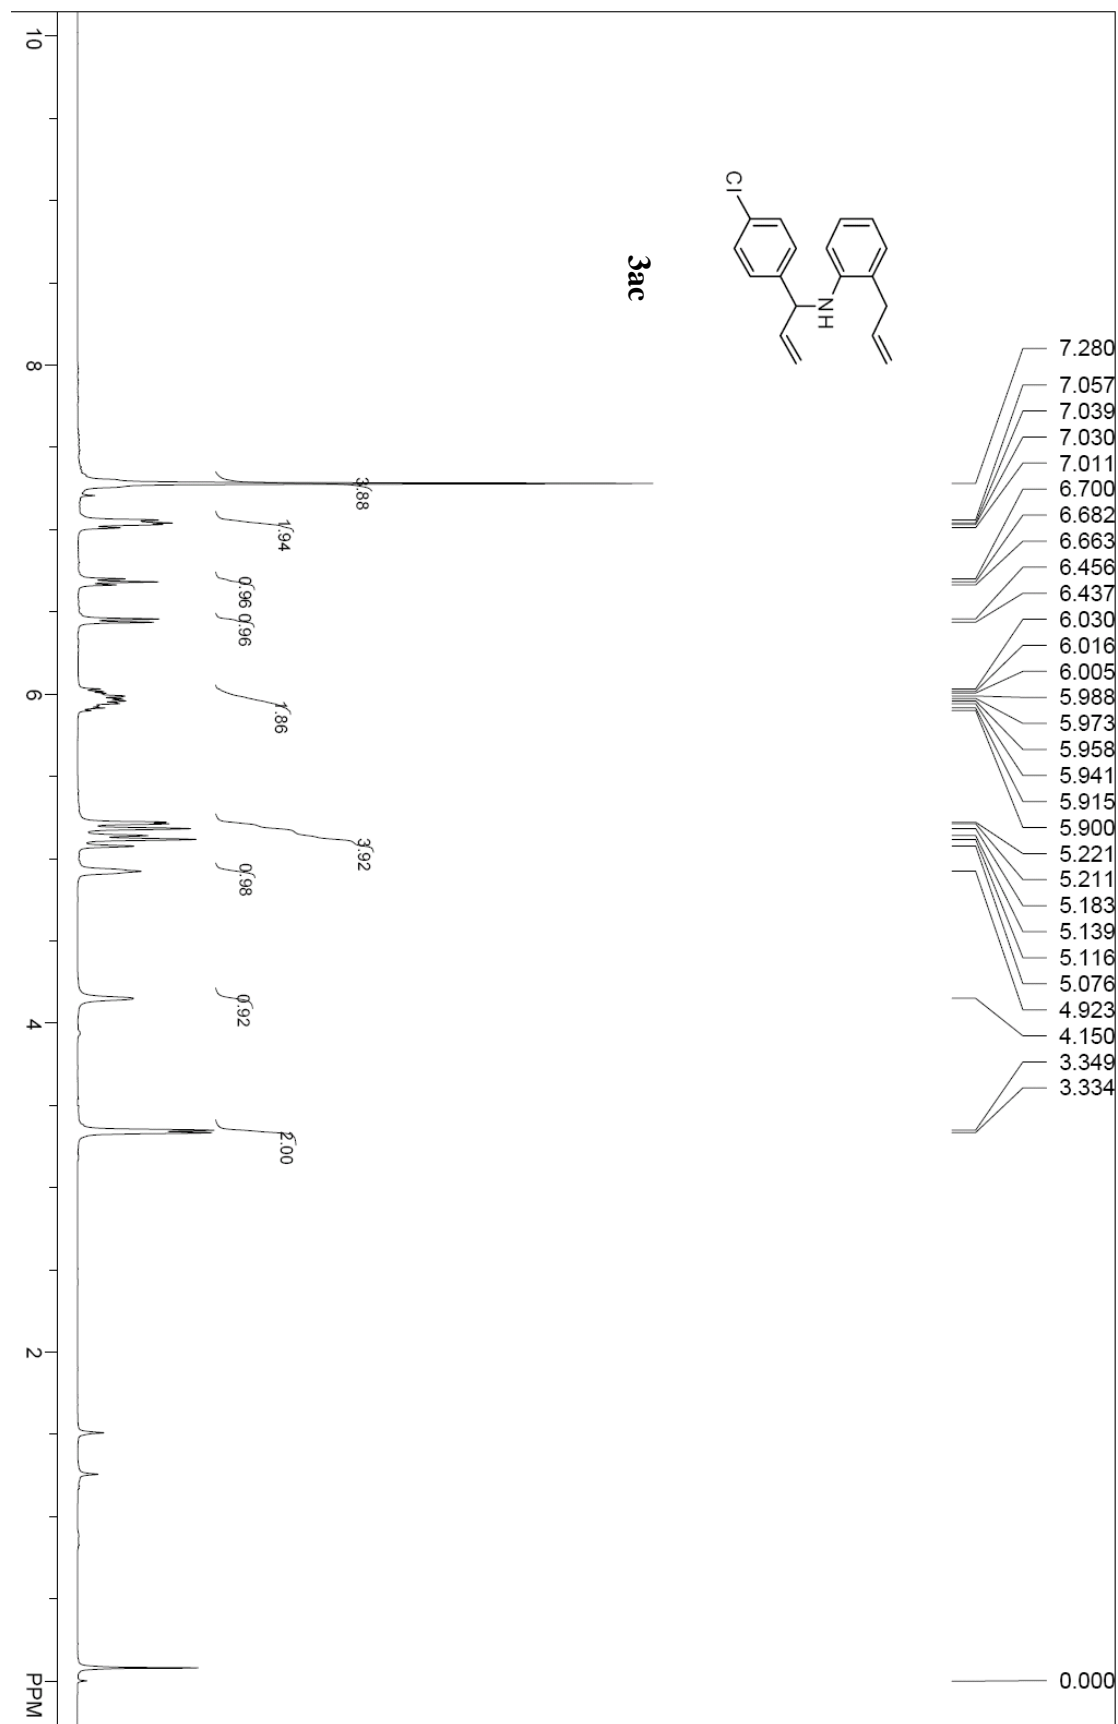



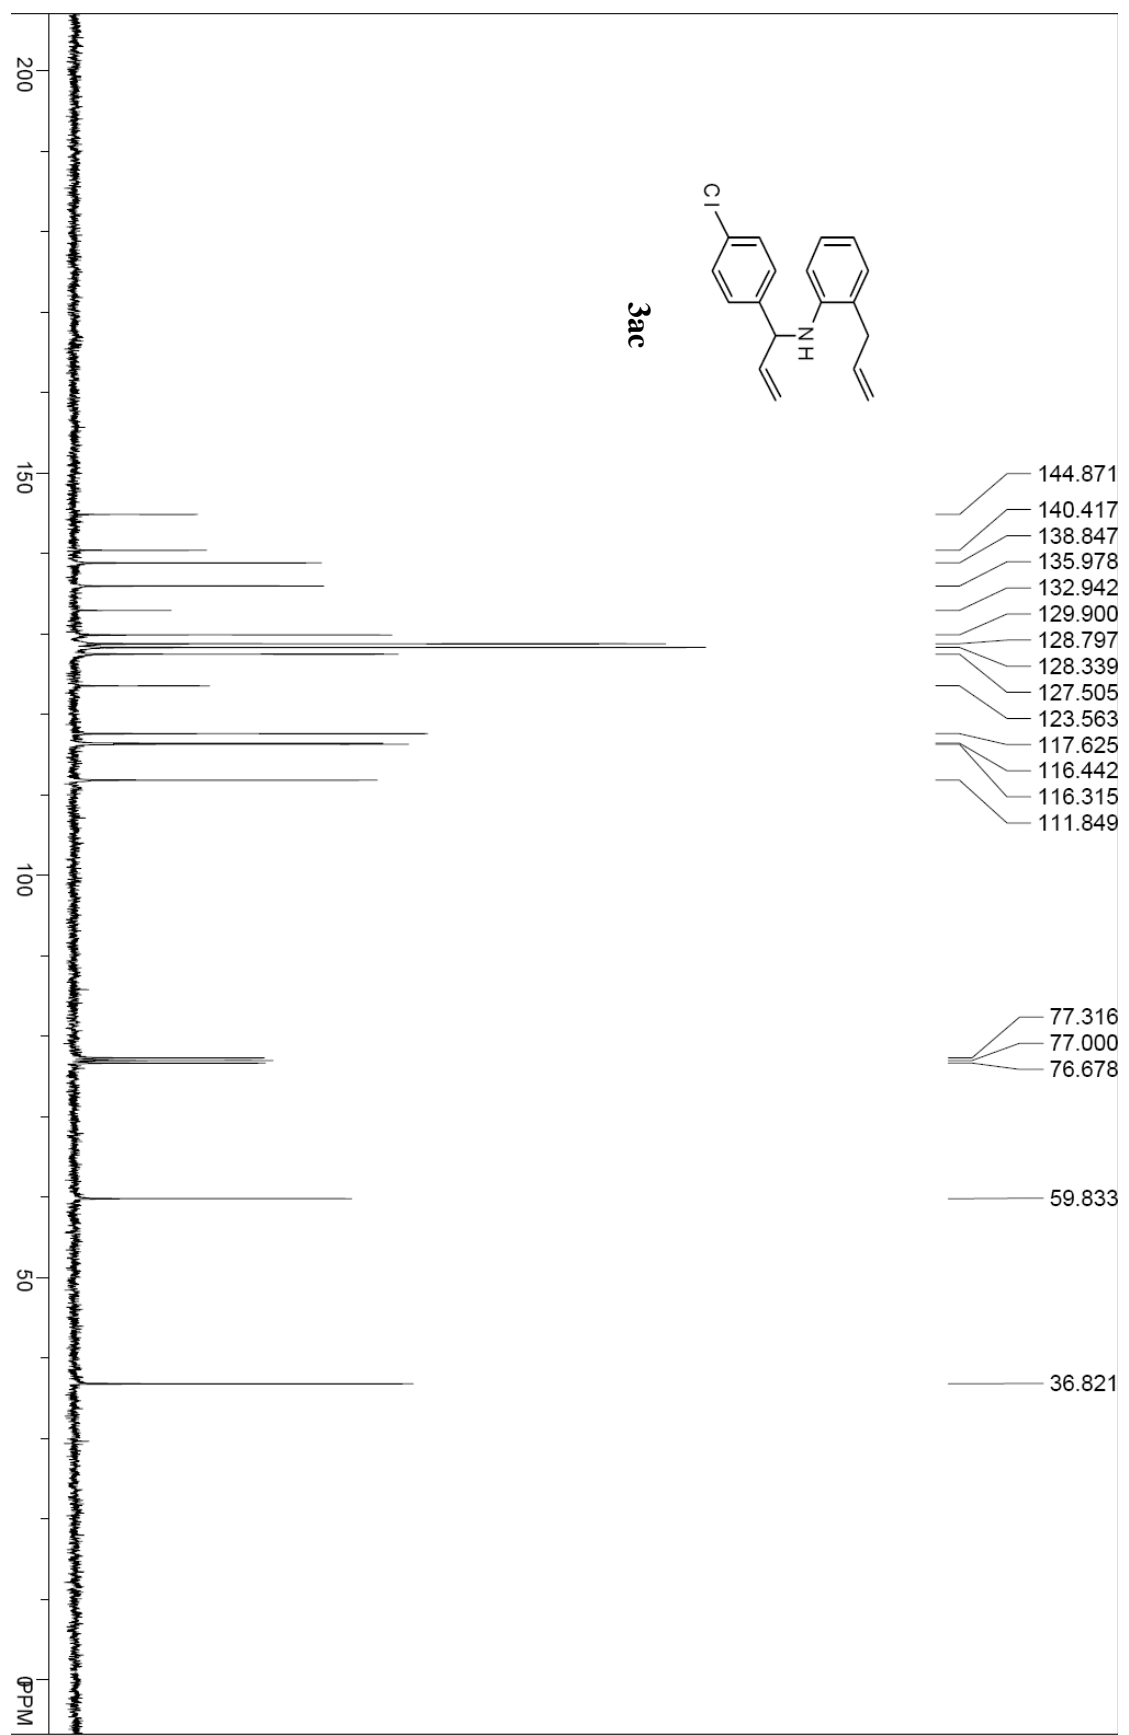

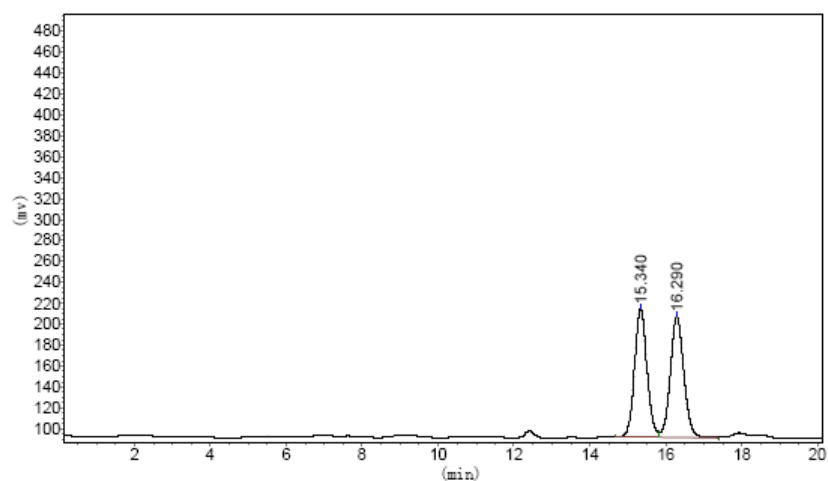

| Peak No.     | R. Time | Peak Height | Peak Area   | Percent  |
|--------------|---------|-------------|-------------|----------|
| 1            | 15.340  | 123440.508  | 2830994.500 | 49.7117  |
| 2            | 16.290  | 116019.320  | 2863830.500 | 50.2883  |
| <b>Total</b> |         | 239459.828  | 5694825.000 | 100.0000 |

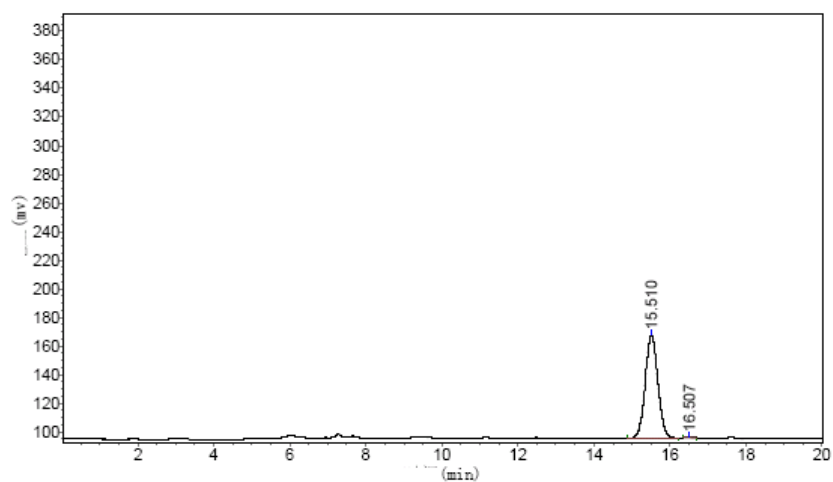

| Peak No.     | R. Time | Peak Height | Peak Area   | Percent  |
|--------------|---------|-------------|-------------|----------|
| 1            | 15.510  | 73050.242   | 1708896.000 | 99.7180  |
| 2            | 16.507  | 381.041     | 4831.871    | 0.2820   |
| <b>Total</b> |         | 73431.283   | 1713727.871 | 100.0000 |

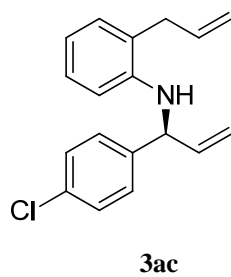

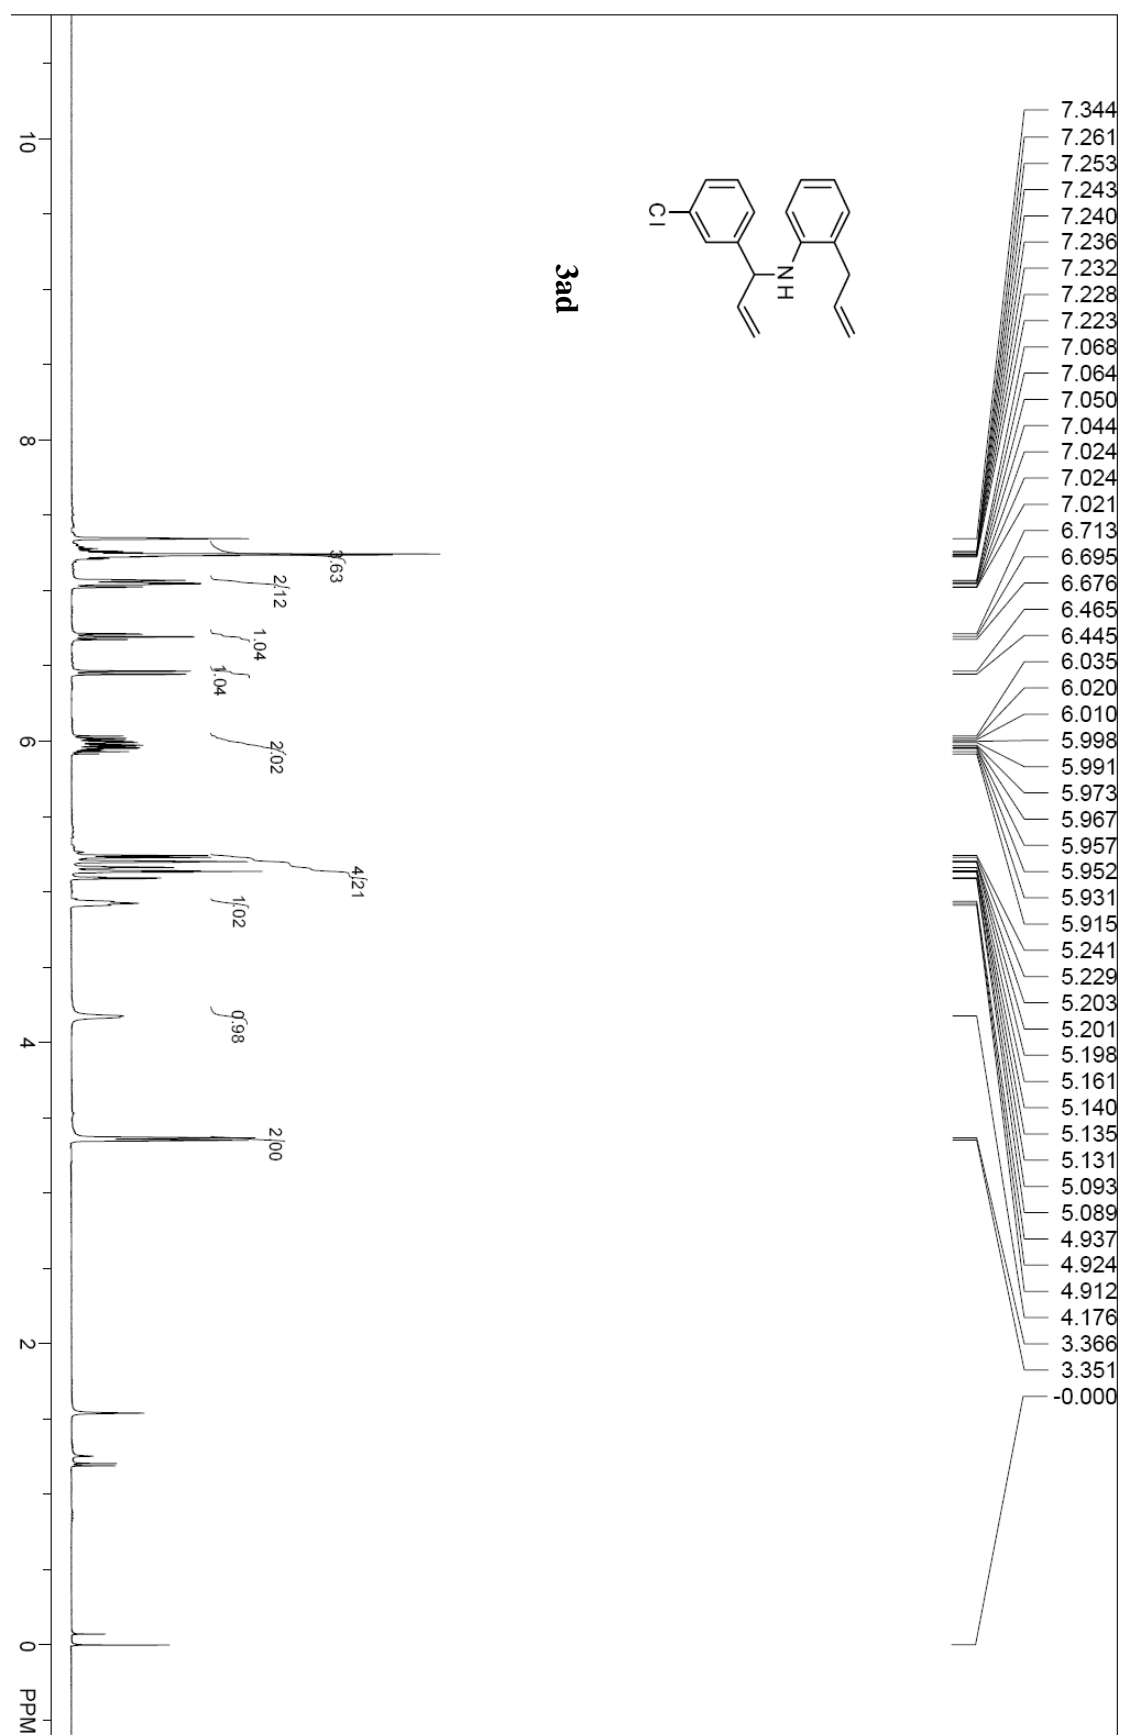

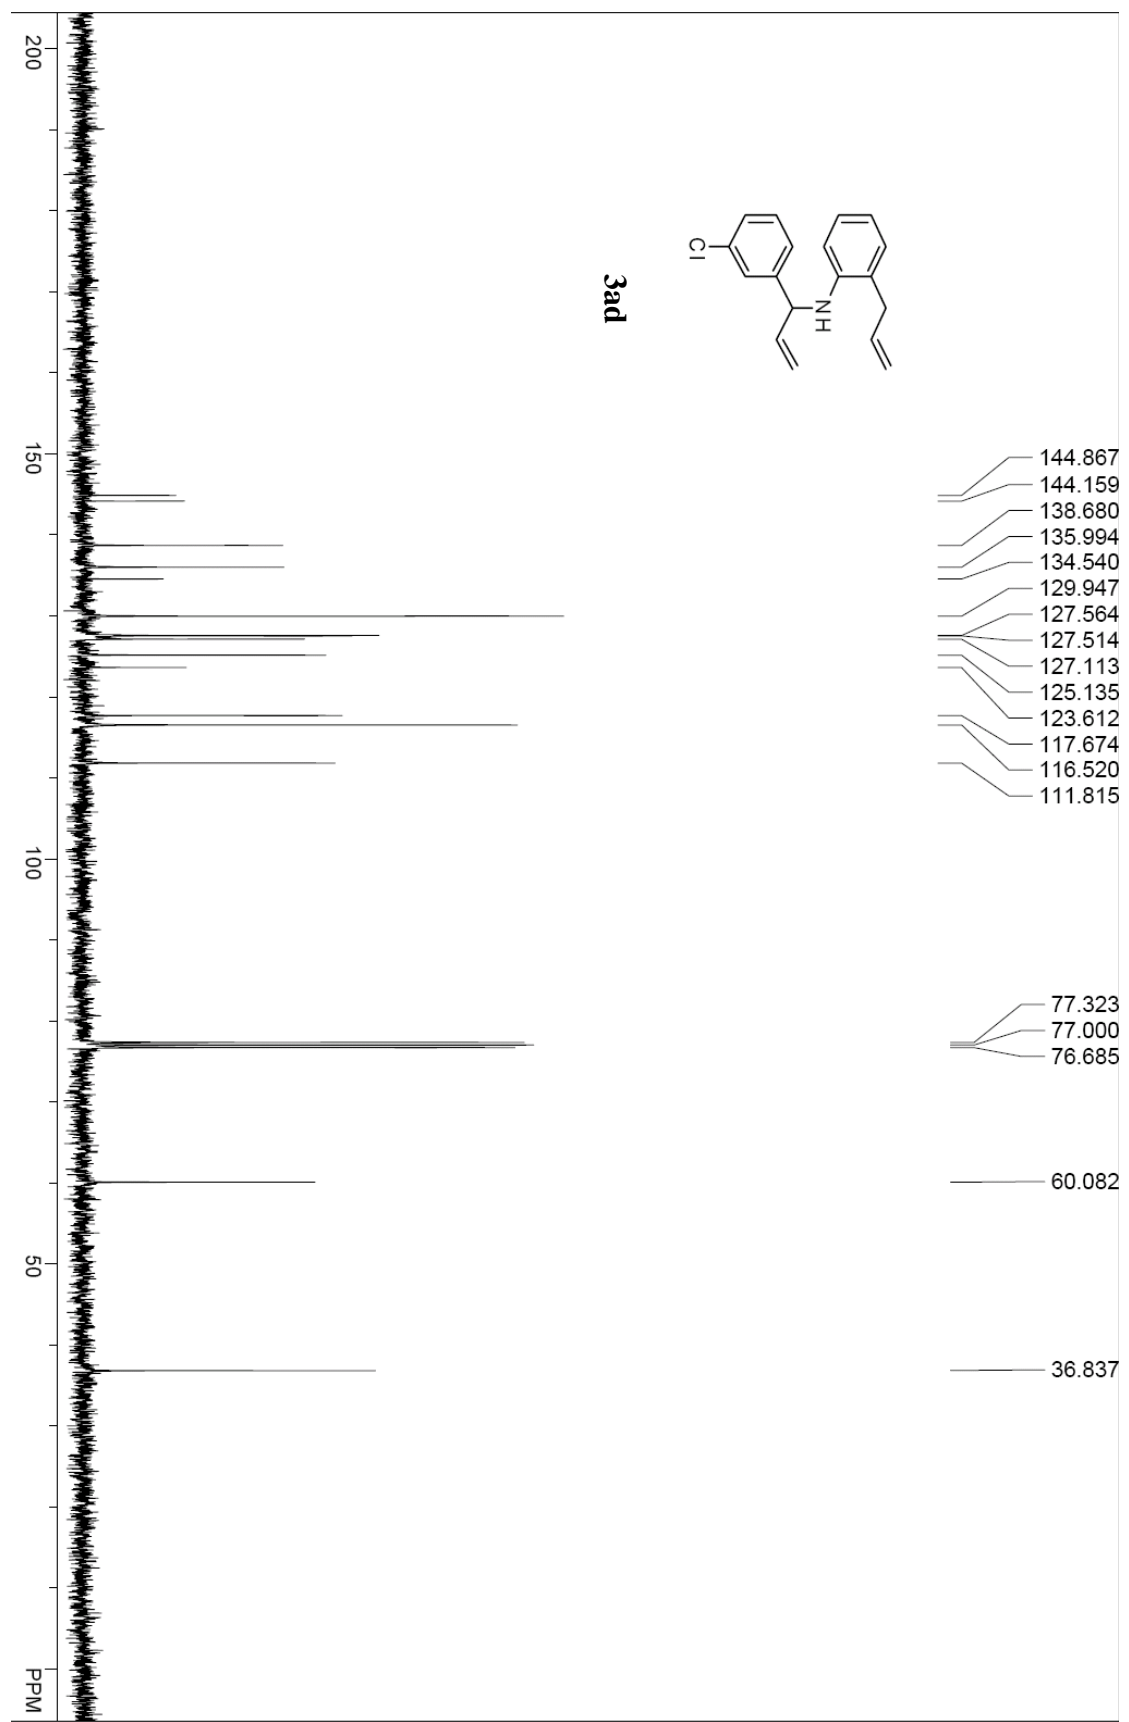

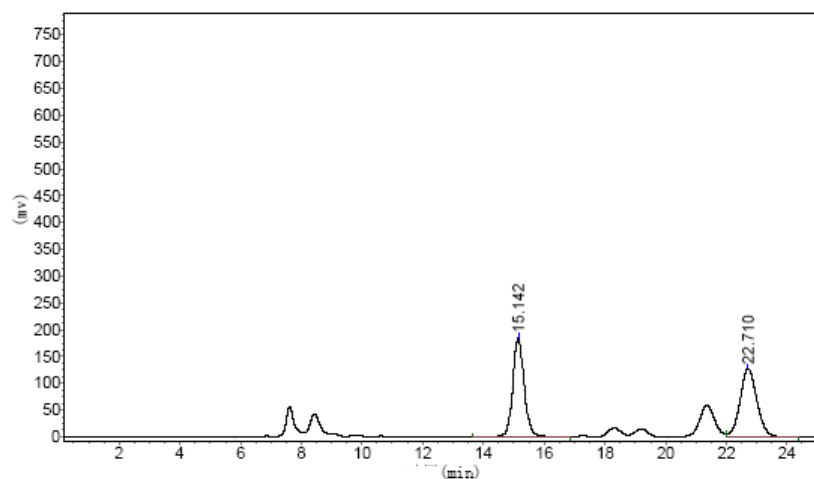

| Peak No.     | R. Time | Peak Height | Peak Area   | Percent  |
|--------------|---------|-------------|-------------|----------|
| 1            | 15.142  | 186180.500  | 4897187.000 | 49.5001  |
| 2            | 22.710  | 128329.188  | 4996106.500 | 50.4999  |
| <b>Total</b> |         | 314509.688  | 9893293.500 | 100.0000 |

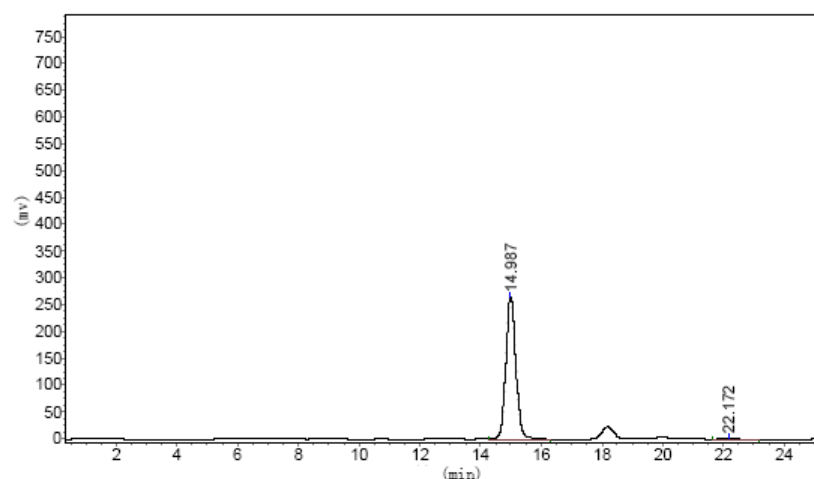

| Peak No.     | R. Time | Peak Height | Peak Area   | Percent  |
|--------------|---------|-------------|-------------|----------|
| 1            | 14.987  | 266473.156  | 6117143.000 | 98.8841  |
| 2            | 22.172  | 2199.713    | 69029.141   | 1.1159   |
| <b>Total</b> |         | 268672.870  | 6186172.141 | 100.0000 |

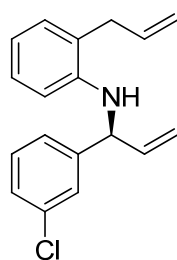

**3ad**

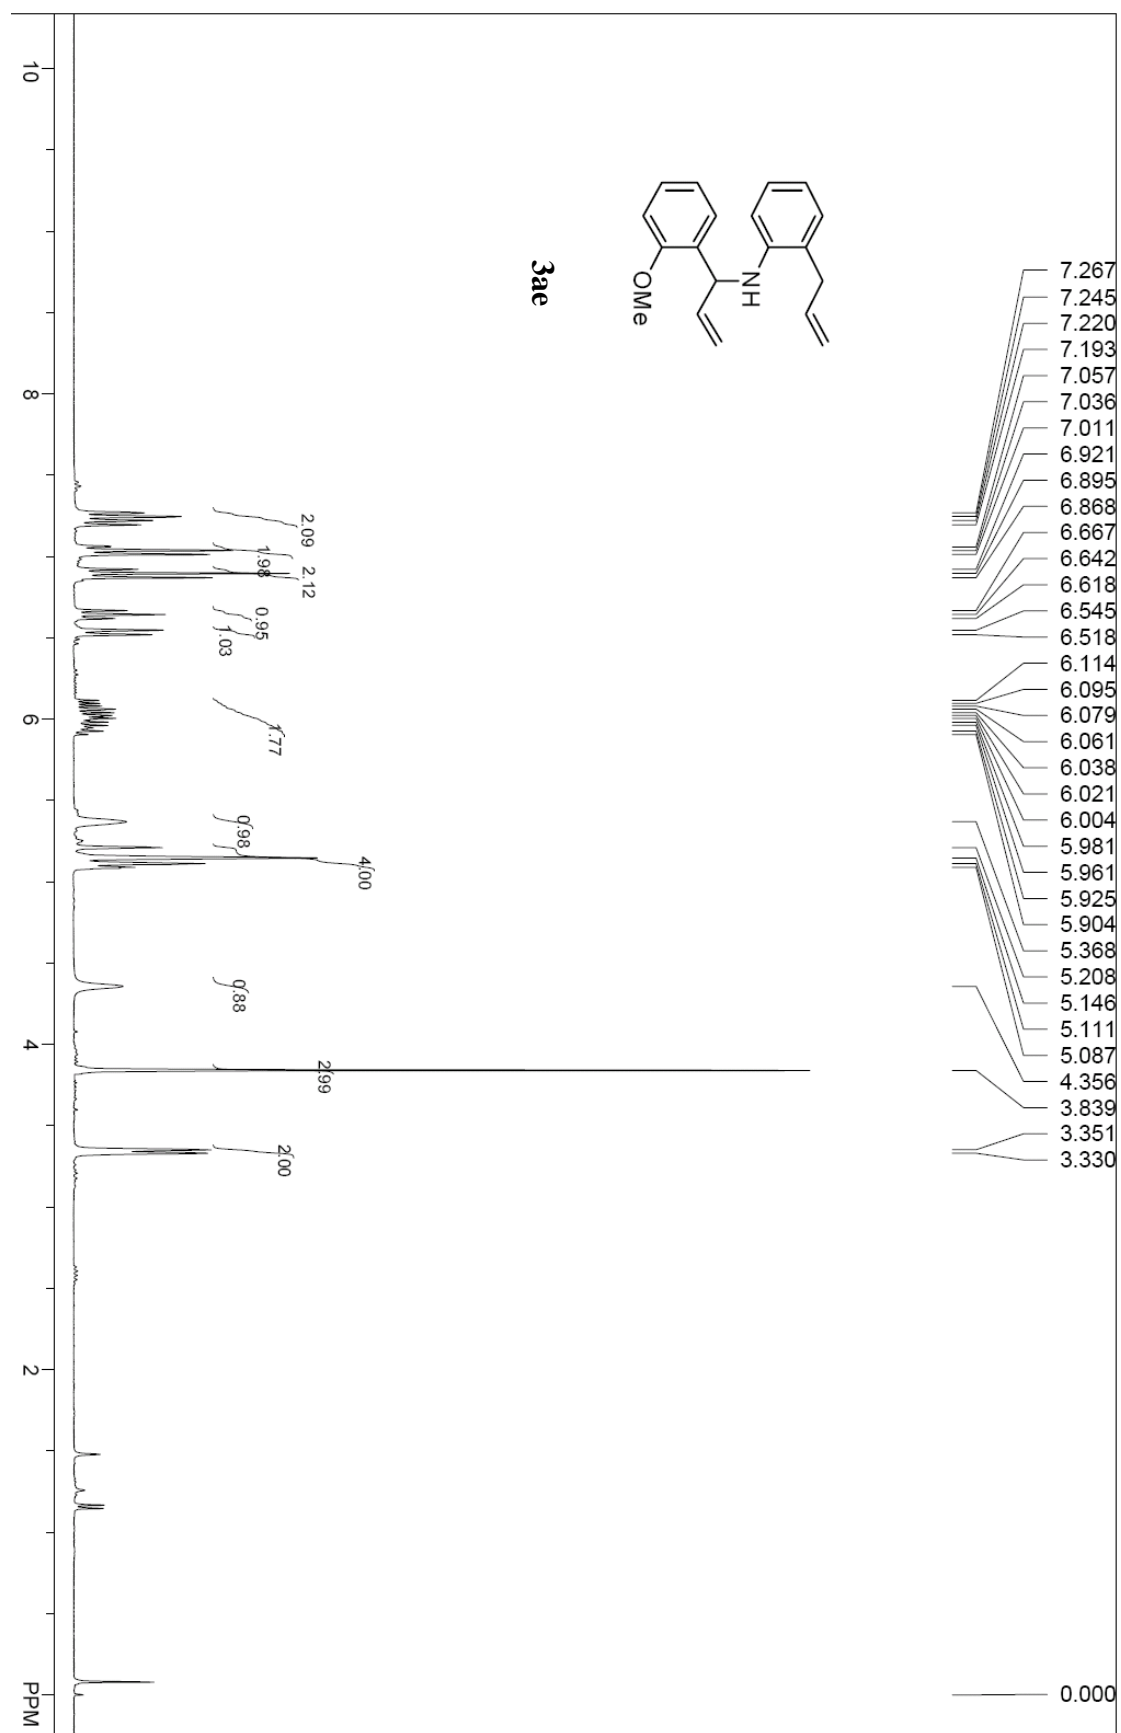

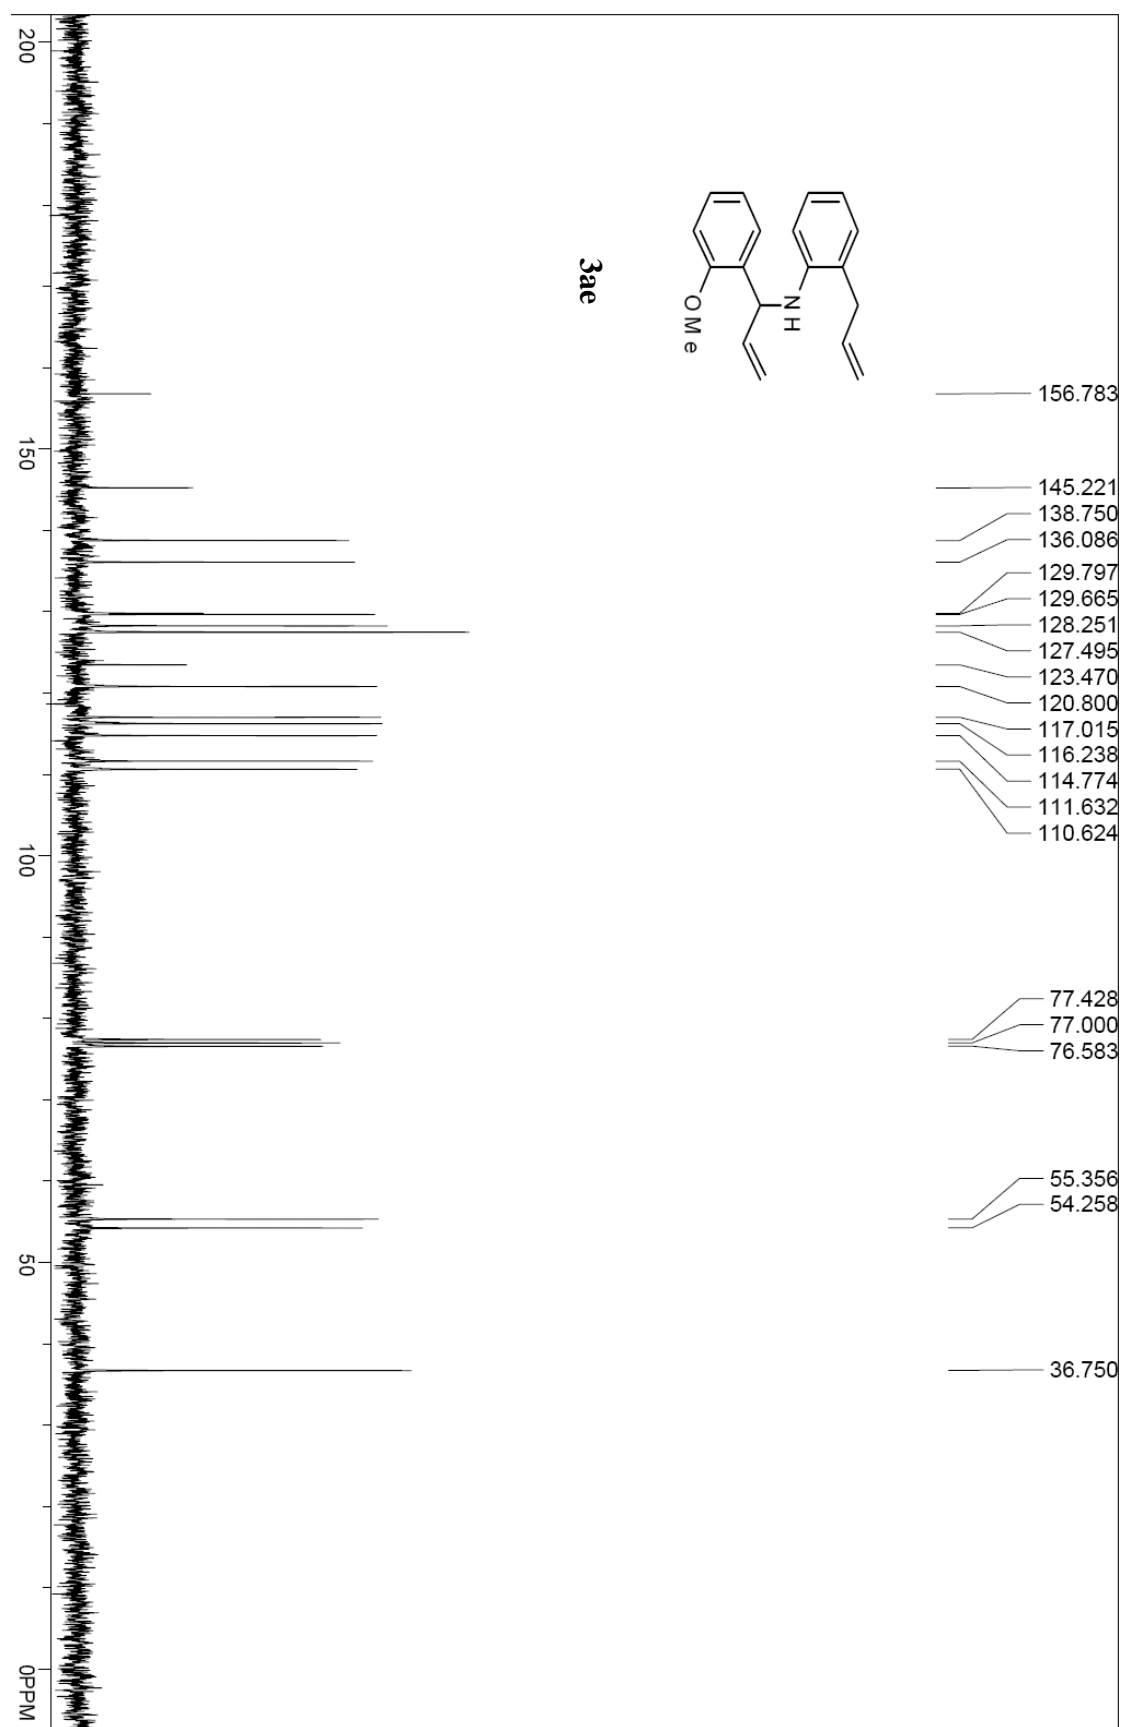

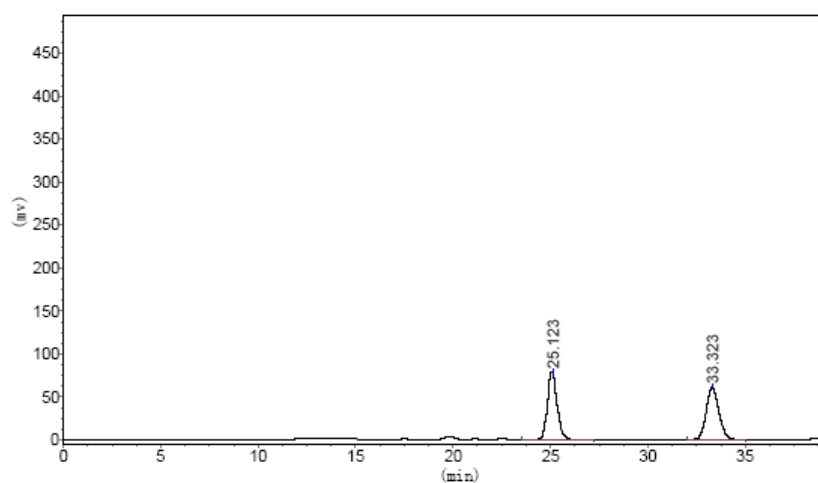

| Peak No.     | R. Time | Peak Height | Peak Area   | Percent  |
|--------------|---------|-------------|-------------|----------|
| 1            | 25.123  | 78588.859   | 2722438.500 | 50.0178  |
| 2            | 33.323  | 60405.891   | 2720500.000 | 49.9822  |
| <b>Total</b> |         | 138994.750  | 5442938.500 | 100.0000 |

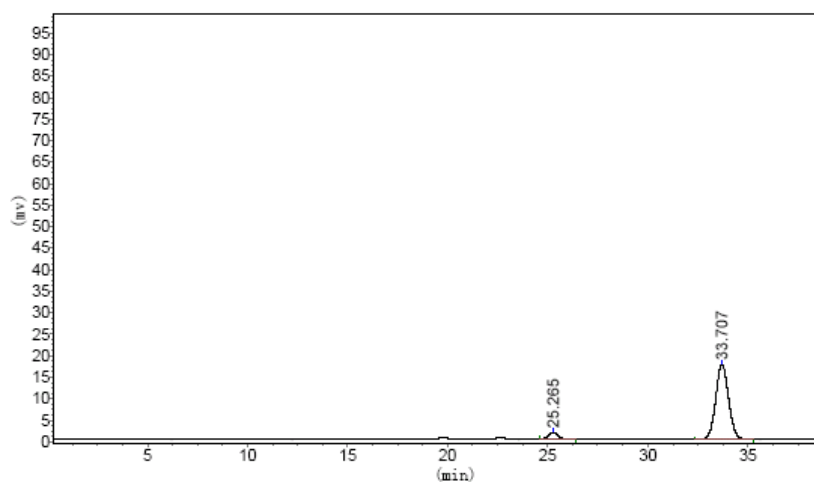

| Peak No.     | R. Time | Peak Height | Peak Area  | Percent  |
|--------------|---------|-------------|------------|----------|
| 1            | 25.265  | 1673.353    | 57470.957  | 6.8521   |
| 2            | 33.707  | 17533.043   | 781260.563 | 93.1479  |
| <b>Total</b> |         | 19206.396   | 838731.520 | 100.0000 |

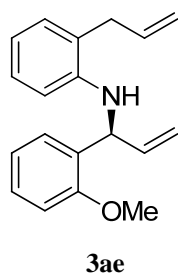



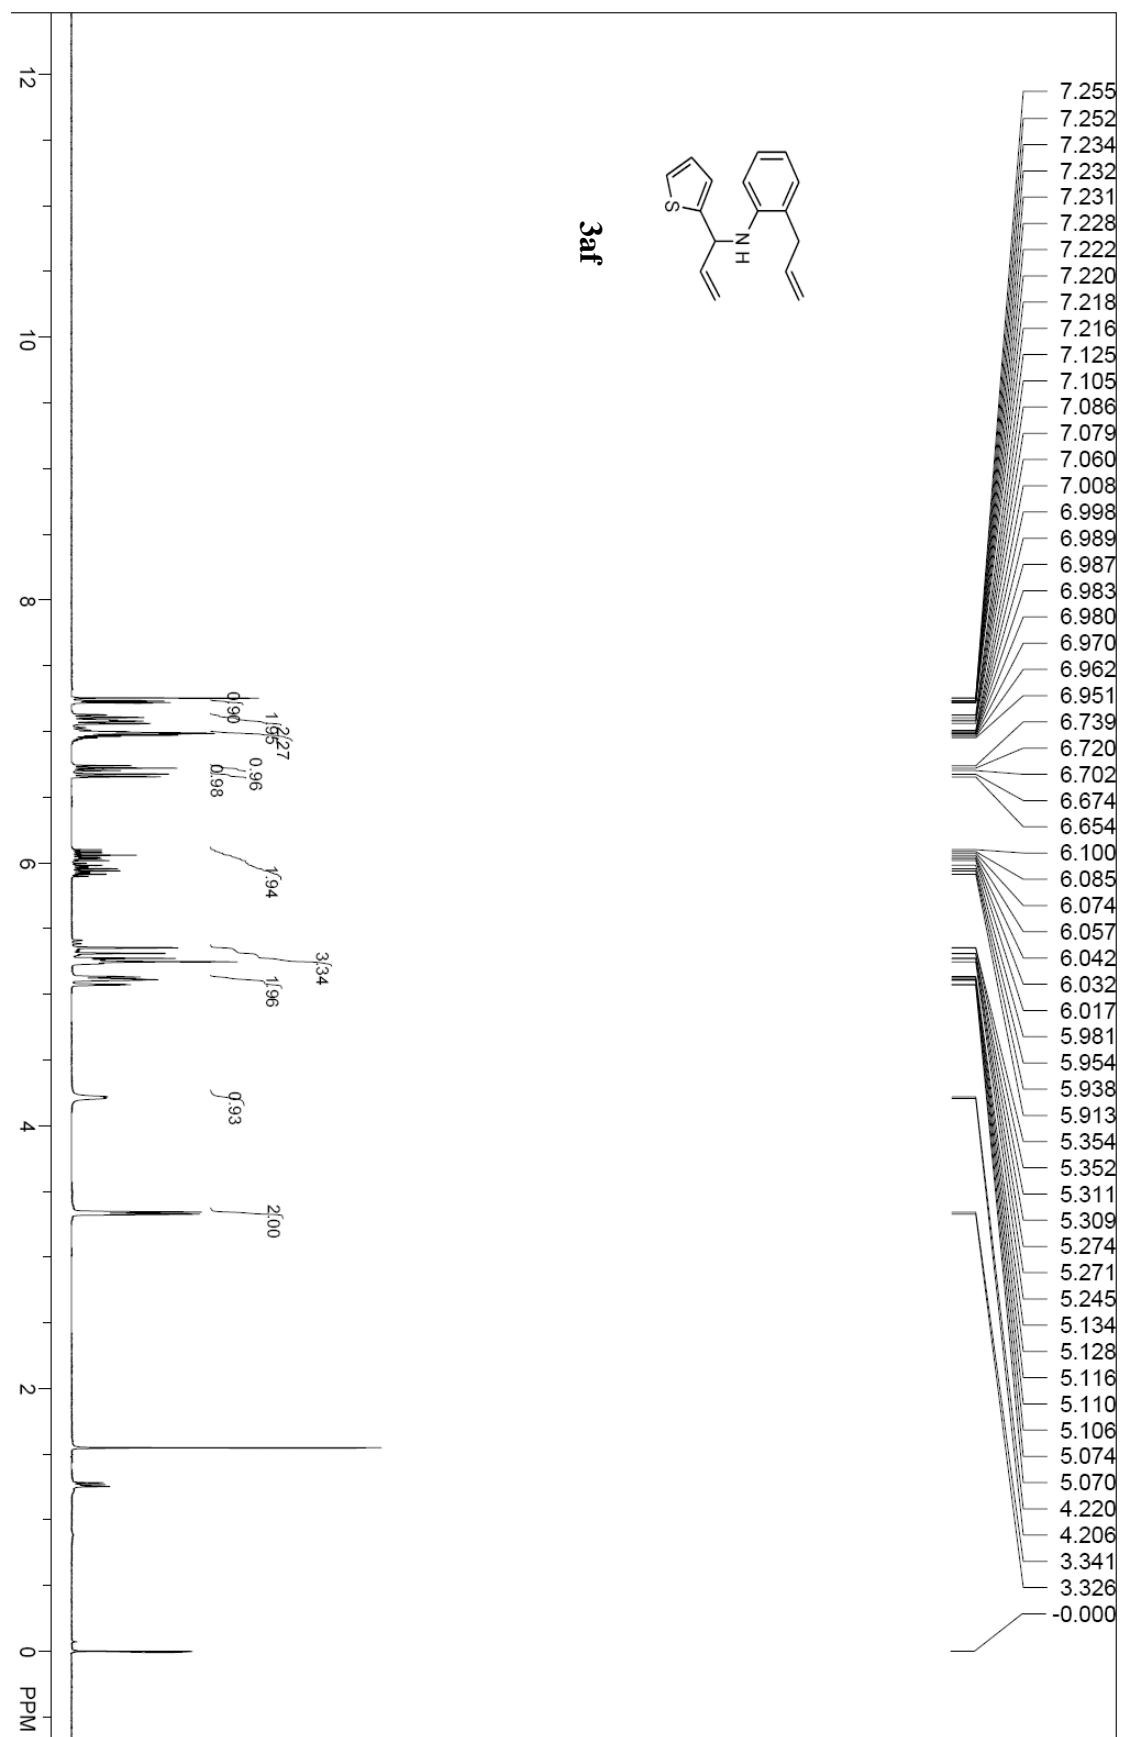

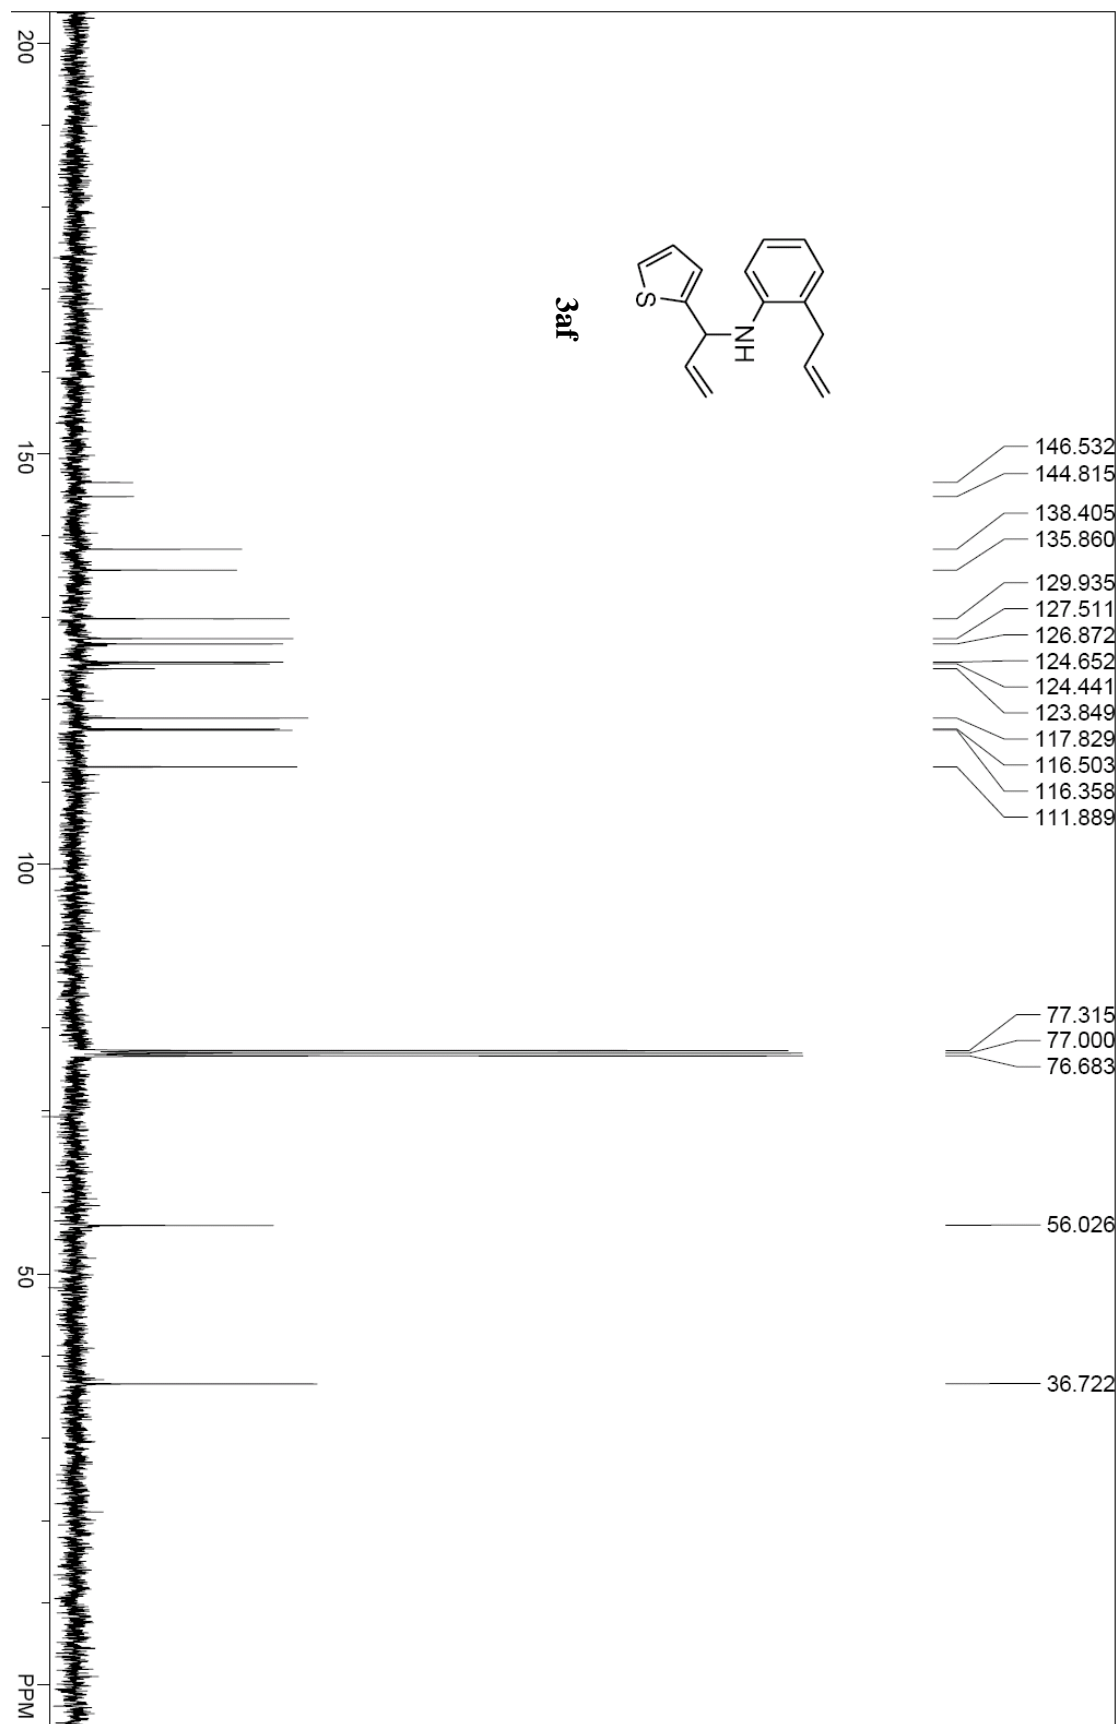

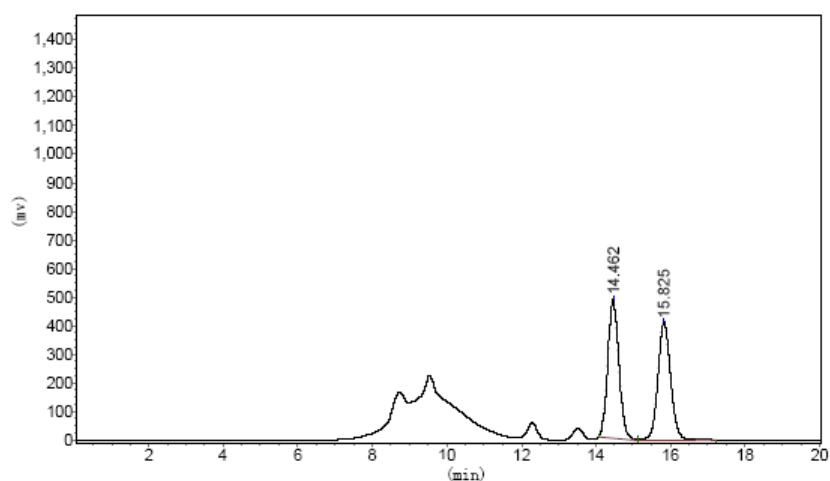

| Peak No.     | R. Time | Peak Height | Peak Area    | Percent  |
|--------------|---------|-------------|--------------|----------|
| 1            | 14.462  | 485043.250  | 10074307.000 | 50.5947  |
| 2            | 15.825  | 412526.250  | 9837457.000  | 49.4053  |
| <b>Total</b> |         | 897569.500  | 19911764.000 | 100.0000 |

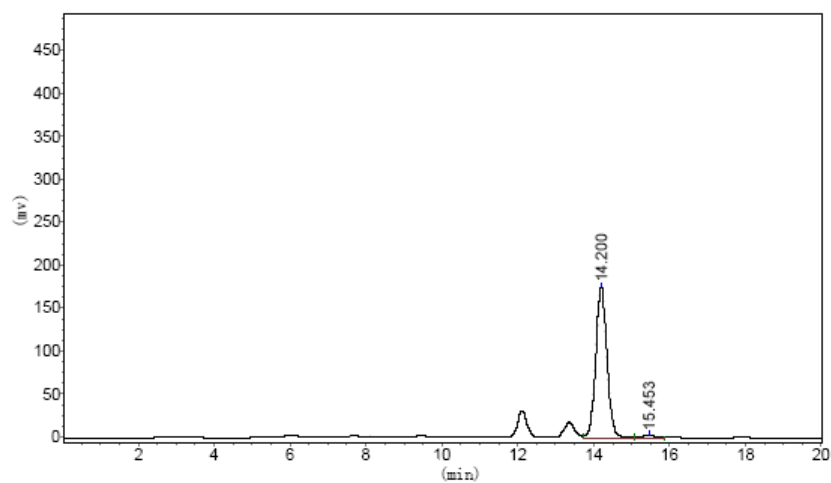

| Peak No.     | R. Time | Peak Height | Peak Area   | Percent  |
|--------------|---------|-------------|-------------|----------|
| 1            | 14.200  | 175743.359  | 3619483.750 | 98.0005  |
| 2            | 15.453  | 2677.976    | 73846.234   | 1.9994   |
| <b>Total</b> |         | 178421.336  | 3693329.984 | 100.0000 |

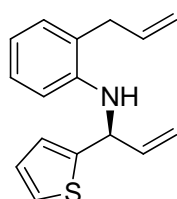

**3af**

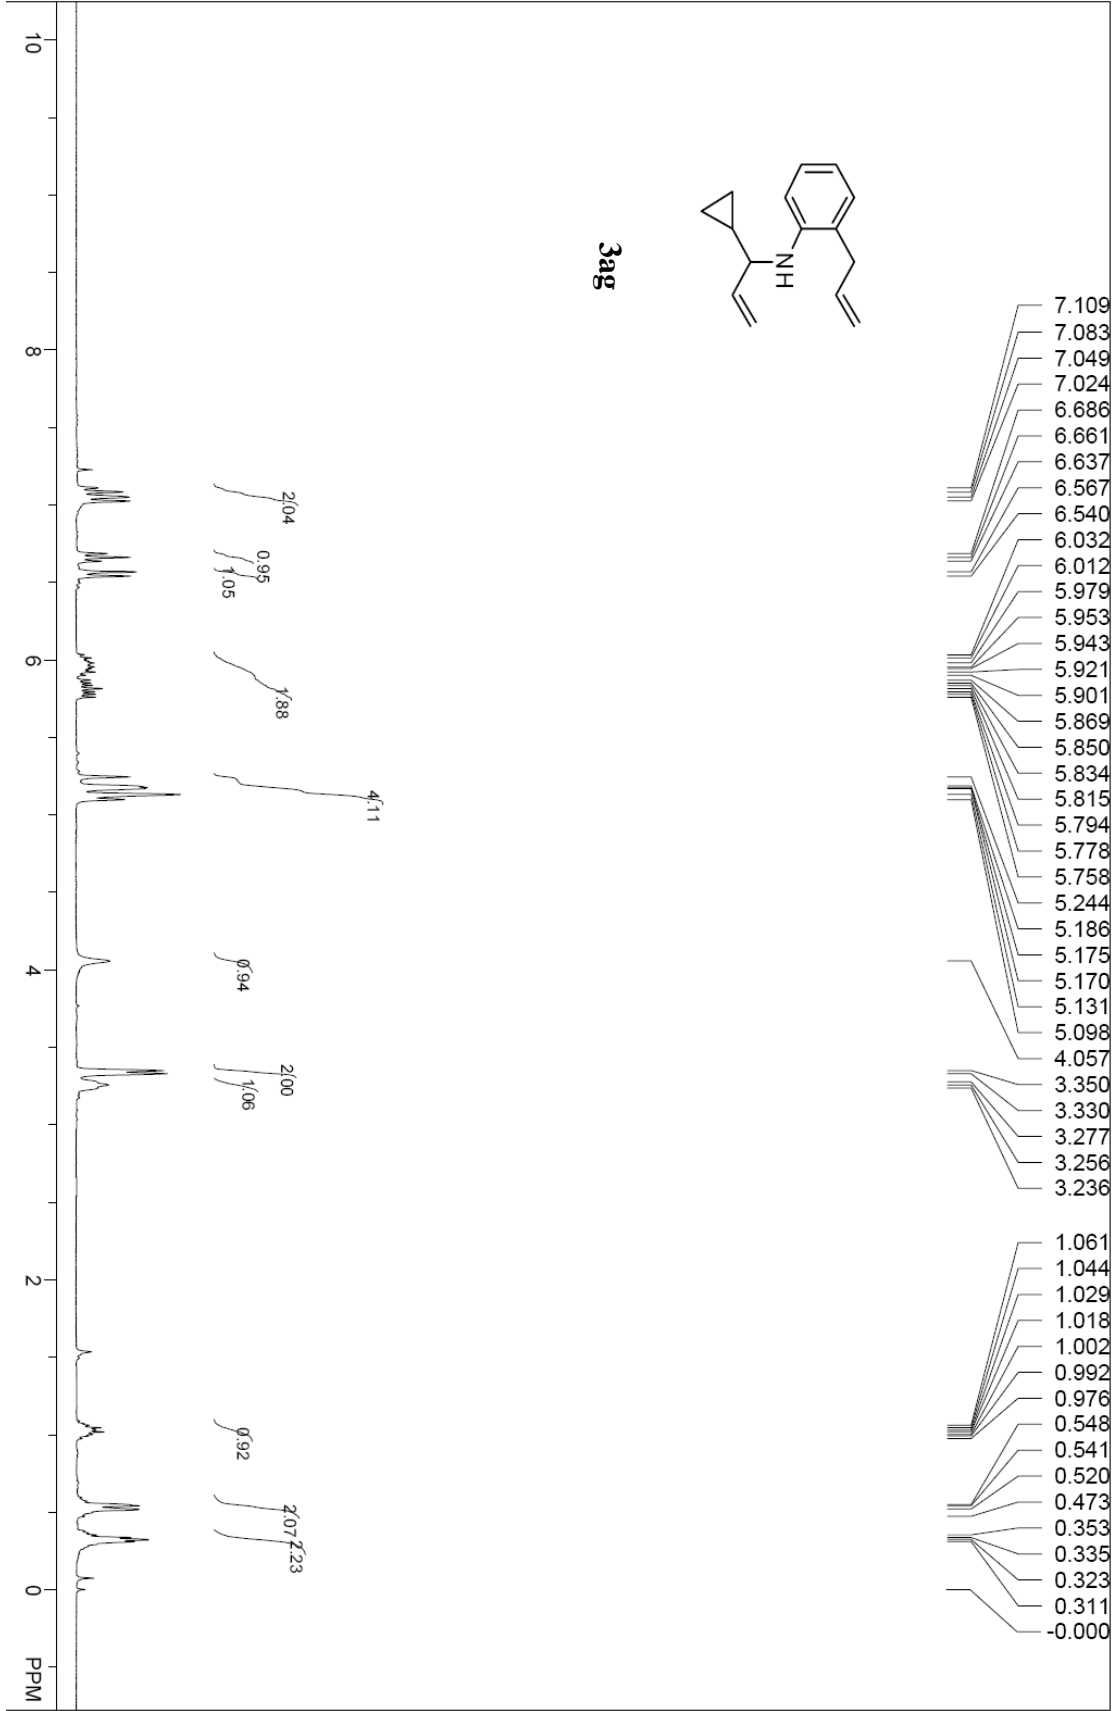

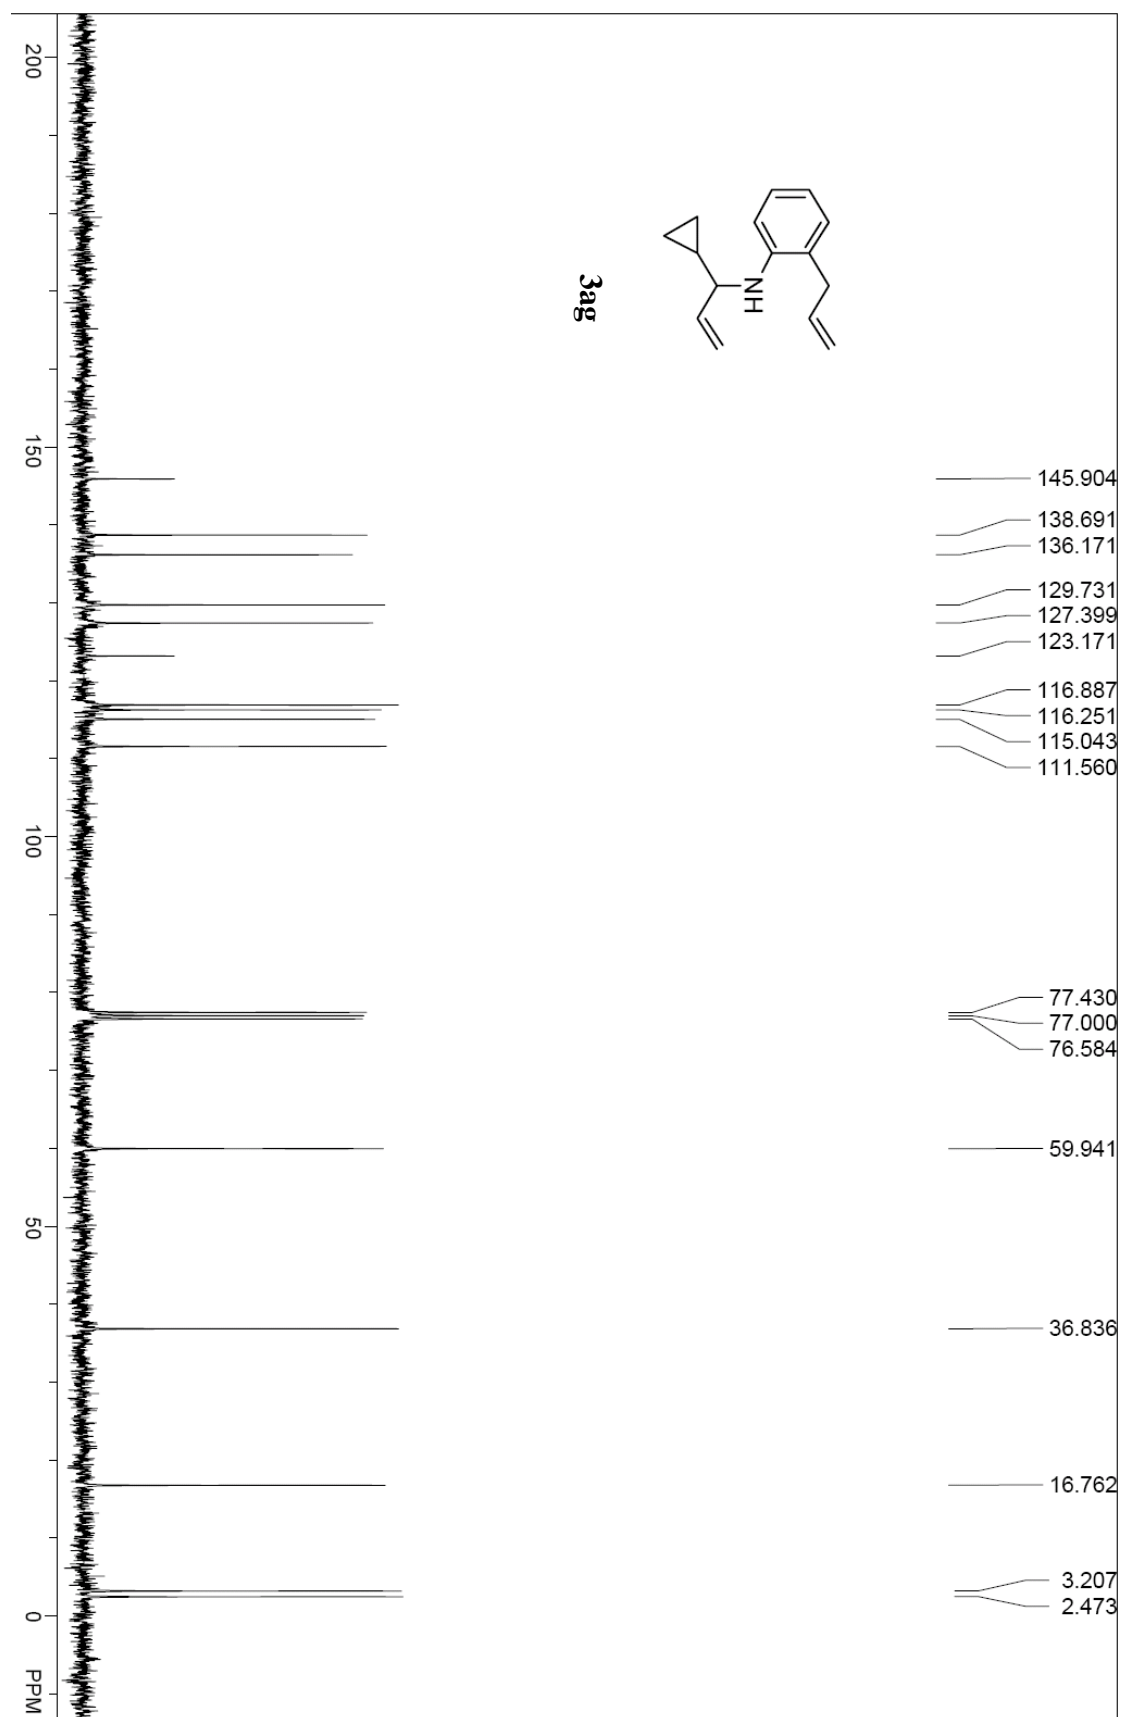

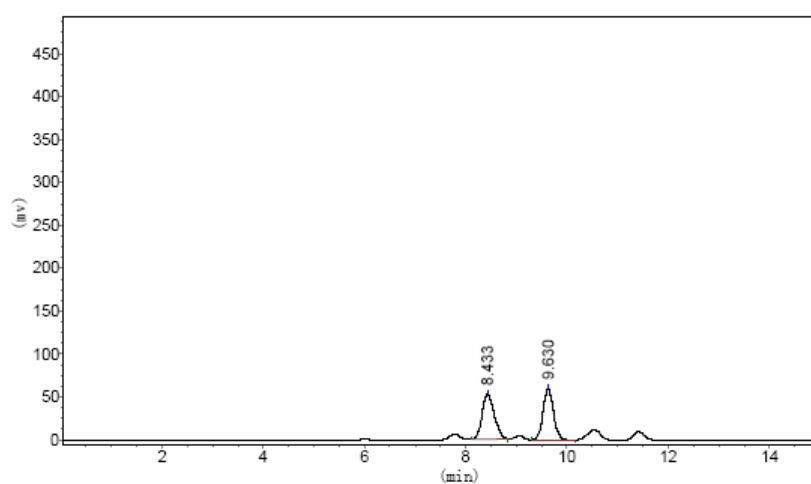

| Peak No.     | R. Time | Peak Height | Peak Area   | Percent  |
|--------------|---------|-------------|-------------|----------|
| 1            | 8.433   | 52358.723   | 864757.688  | 49.2863  |
| 2            | 9.630   | 60903.676   | 889801.063  | 50.7137  |
| <b>Total</b> |         | 113262.398  | 1754558.750 | 100.0000 |

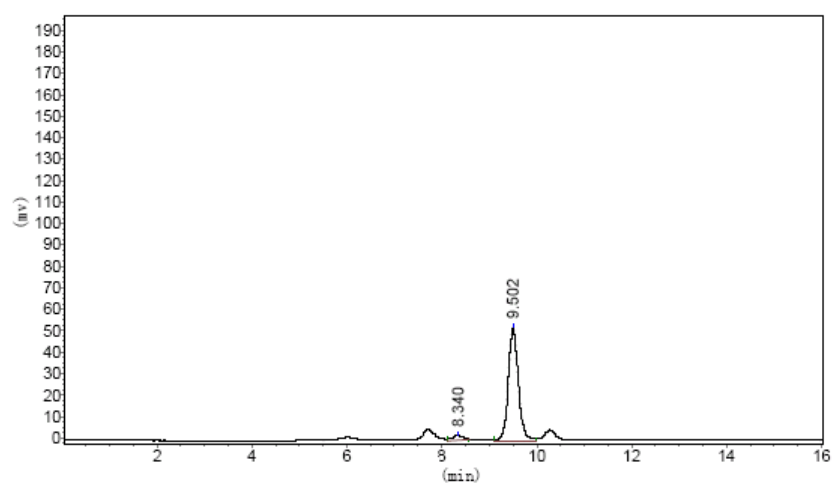

| Peak No.     | R. Time | Peak Height | Peak Area  | Percent  |
|--------------|---------|-------------|------------|----------|
| 1            | 8.340   | 1964.500    | 32668.006  | 4.0352   |
| 2            | 9.502   | 52741.727   | 776909.750 | 95.9648  |
| <b>Total</b> |         | 54706.227   | 809577.756 | 100.0000 |

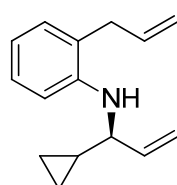

**3ag**

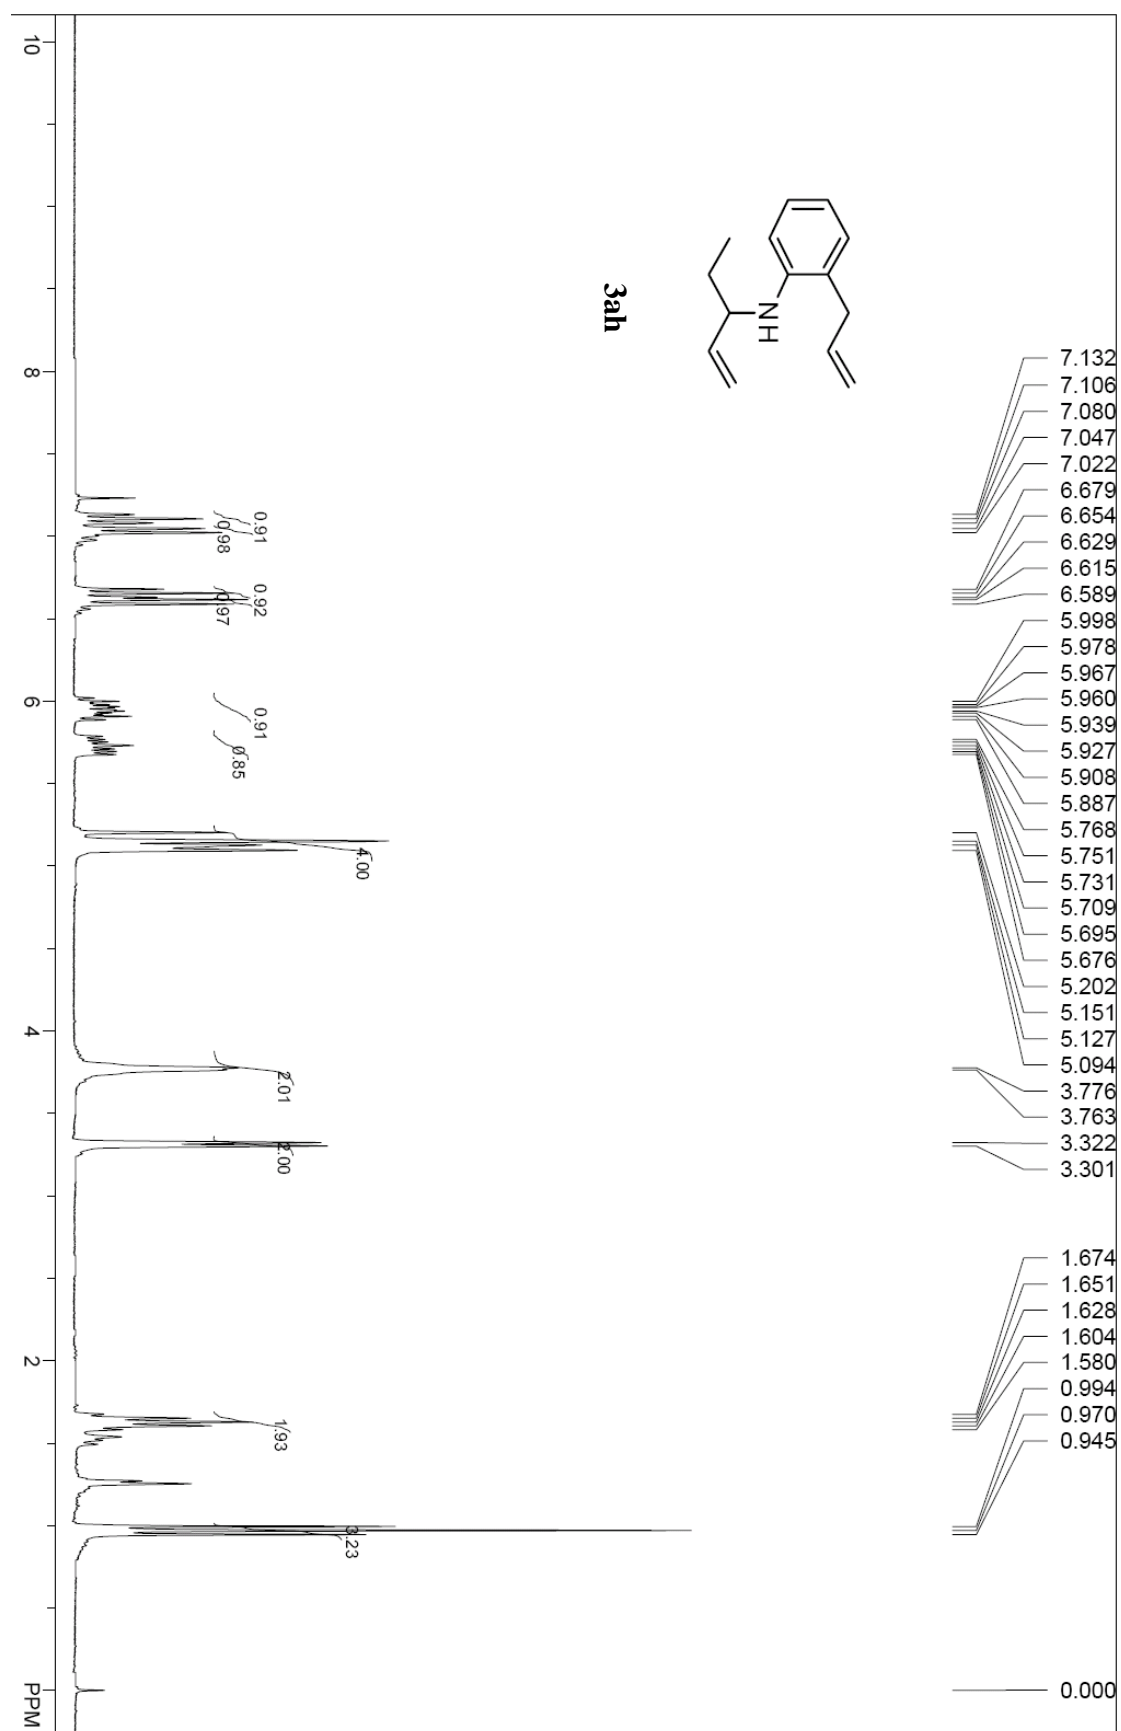

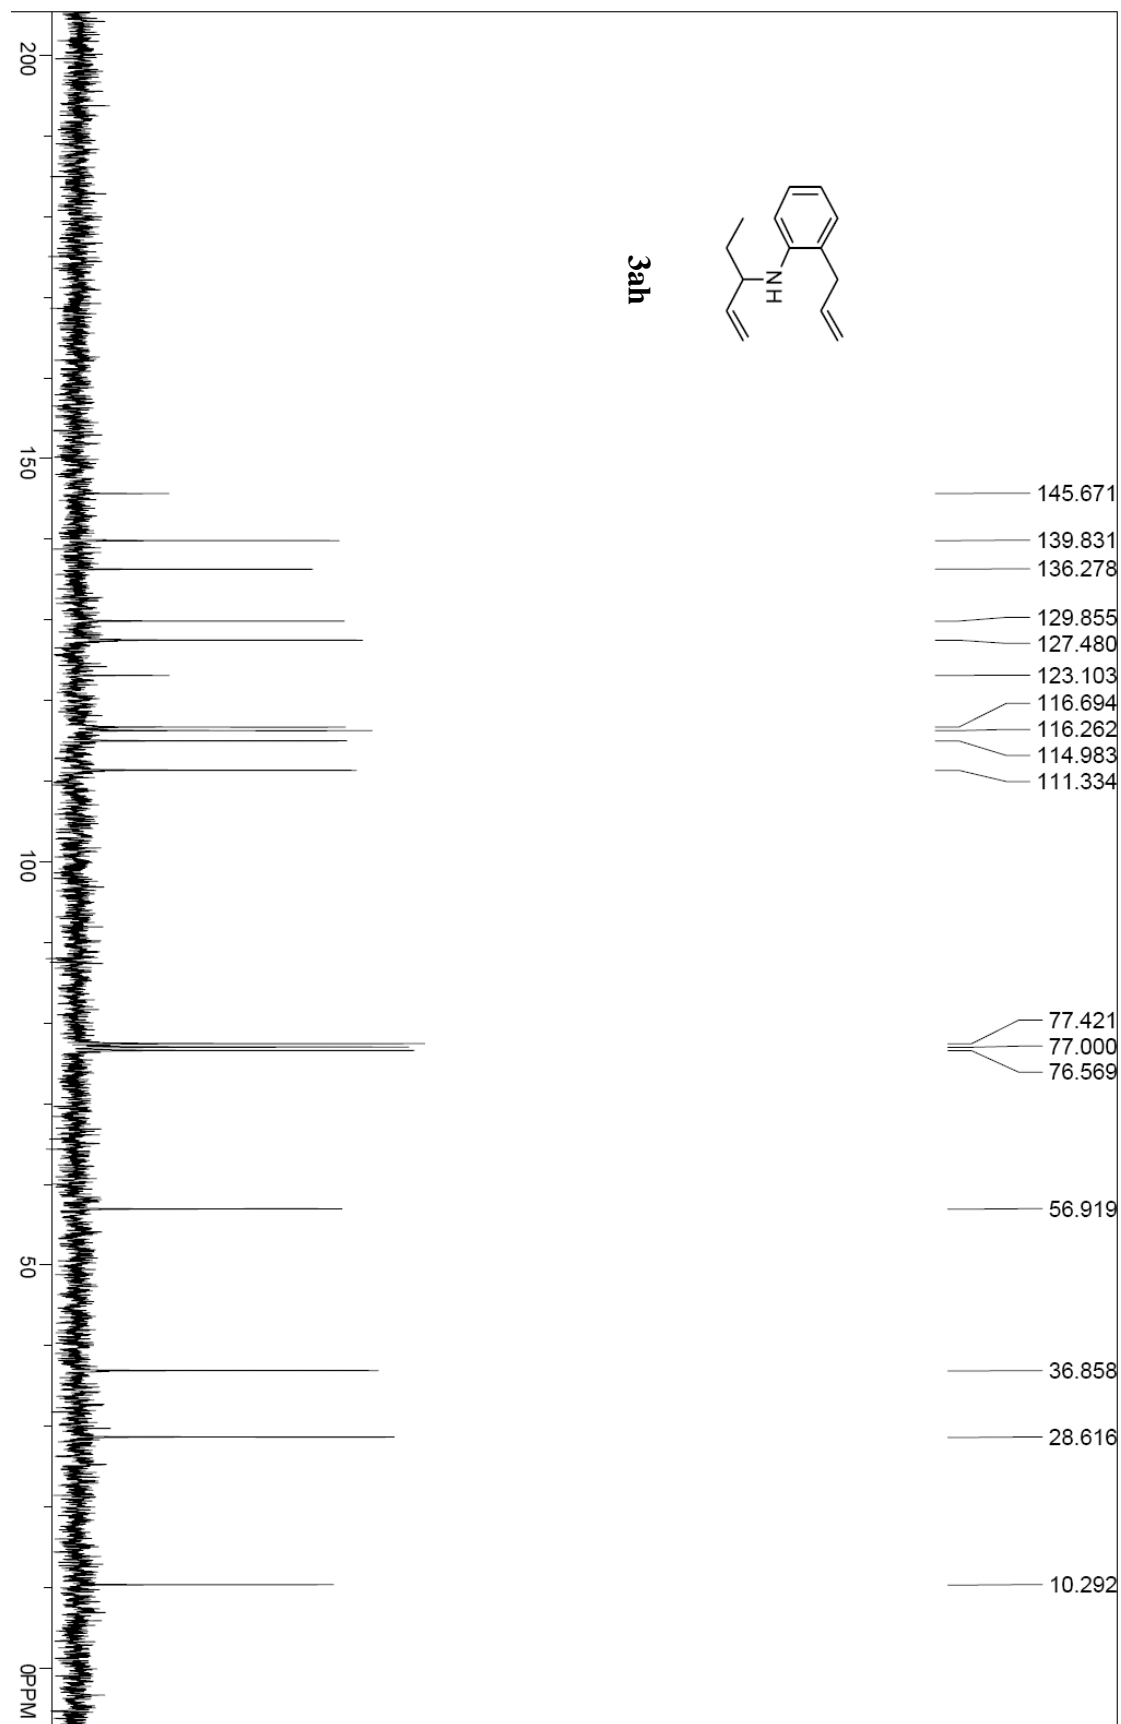



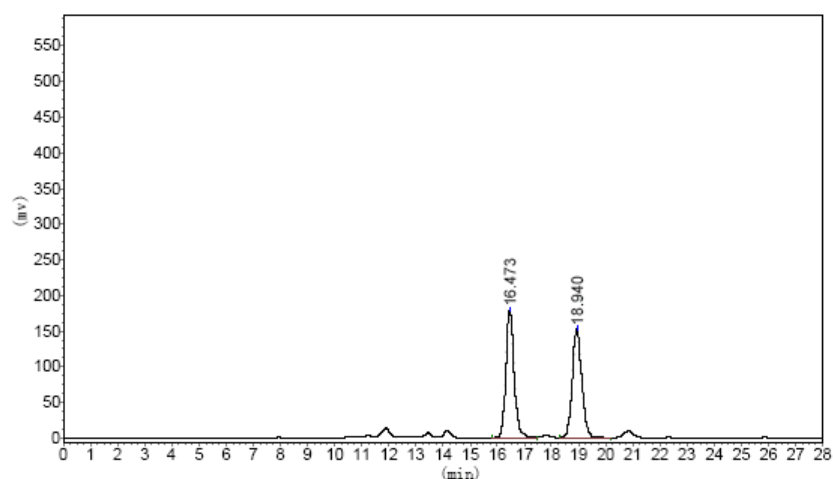

| Peak No.     | R. Time | Peak Height | Peak Area   | Percent  |
|--------------|---------|-------------|-------------|----------|
| 1            | 16.473  | 177380.438  | 3816072.750 | 50.4848  |
| 2            | 18.940  | 151656.359  | 3742776.000 | 49.5152  |
| <b>Total</b> |         | 329036.797  | 7558848.750 | 100.0000 |

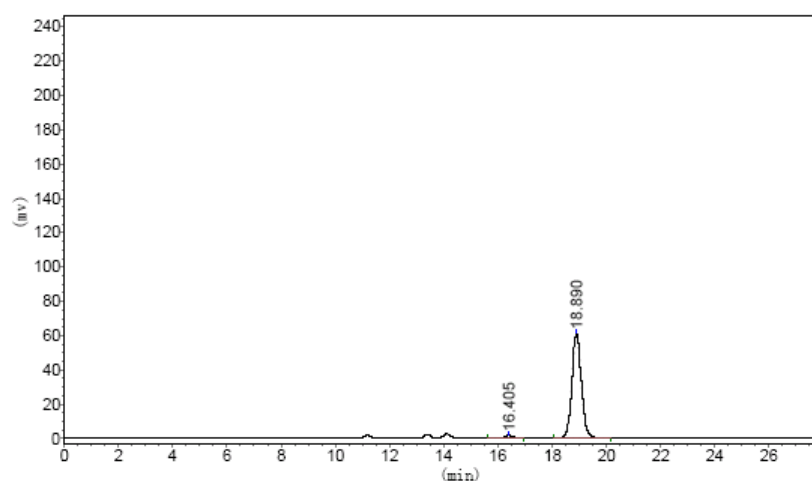

| Peak No.     | R. Time | Peak Height | Peak Area   | Percent  |
|--------------|---------|-------------|-------------|----------|
| 1            | 16.405  | 1484.579    | 30940.600   | 2.0434   |
| 2            | 18.890  | 61130.469   | 1483197.625 | 97.9566  |
| <b>Total</b> |         | 62615.048   | 1514138.225 | 100.0000 |

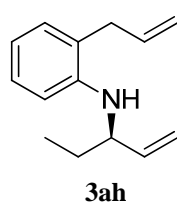

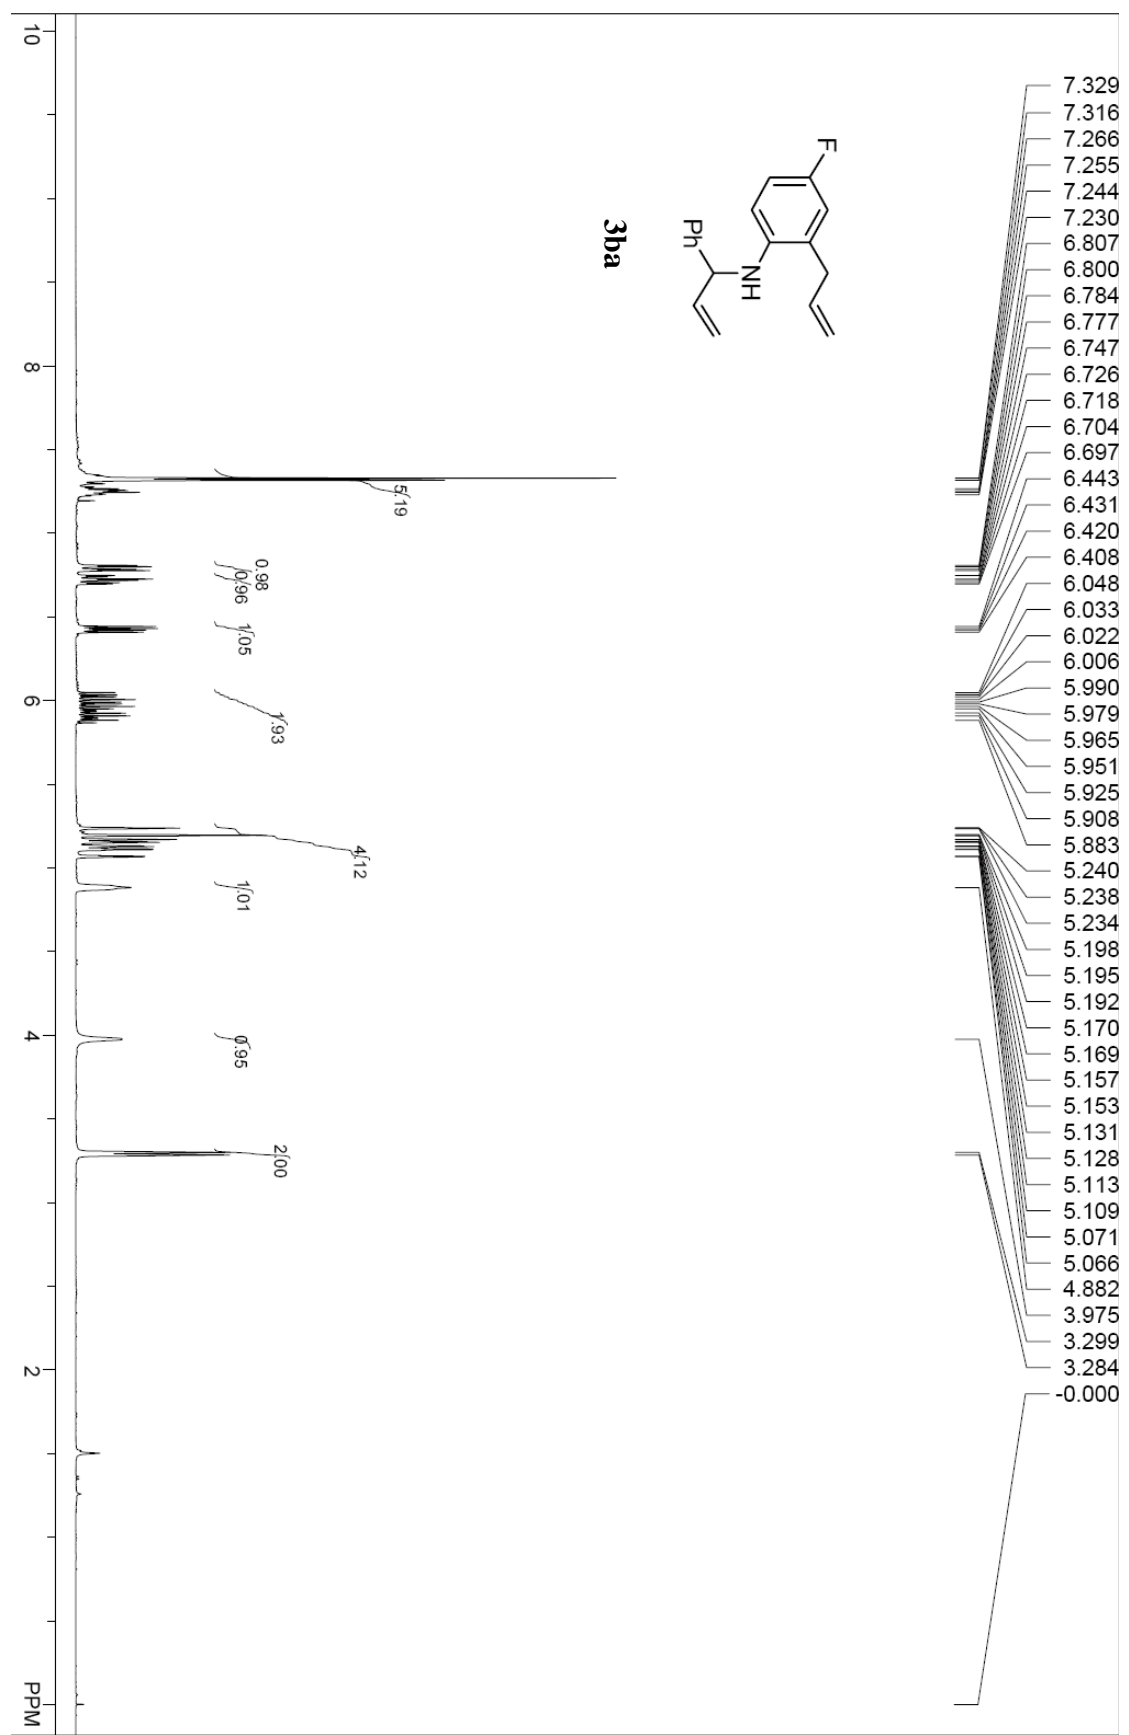

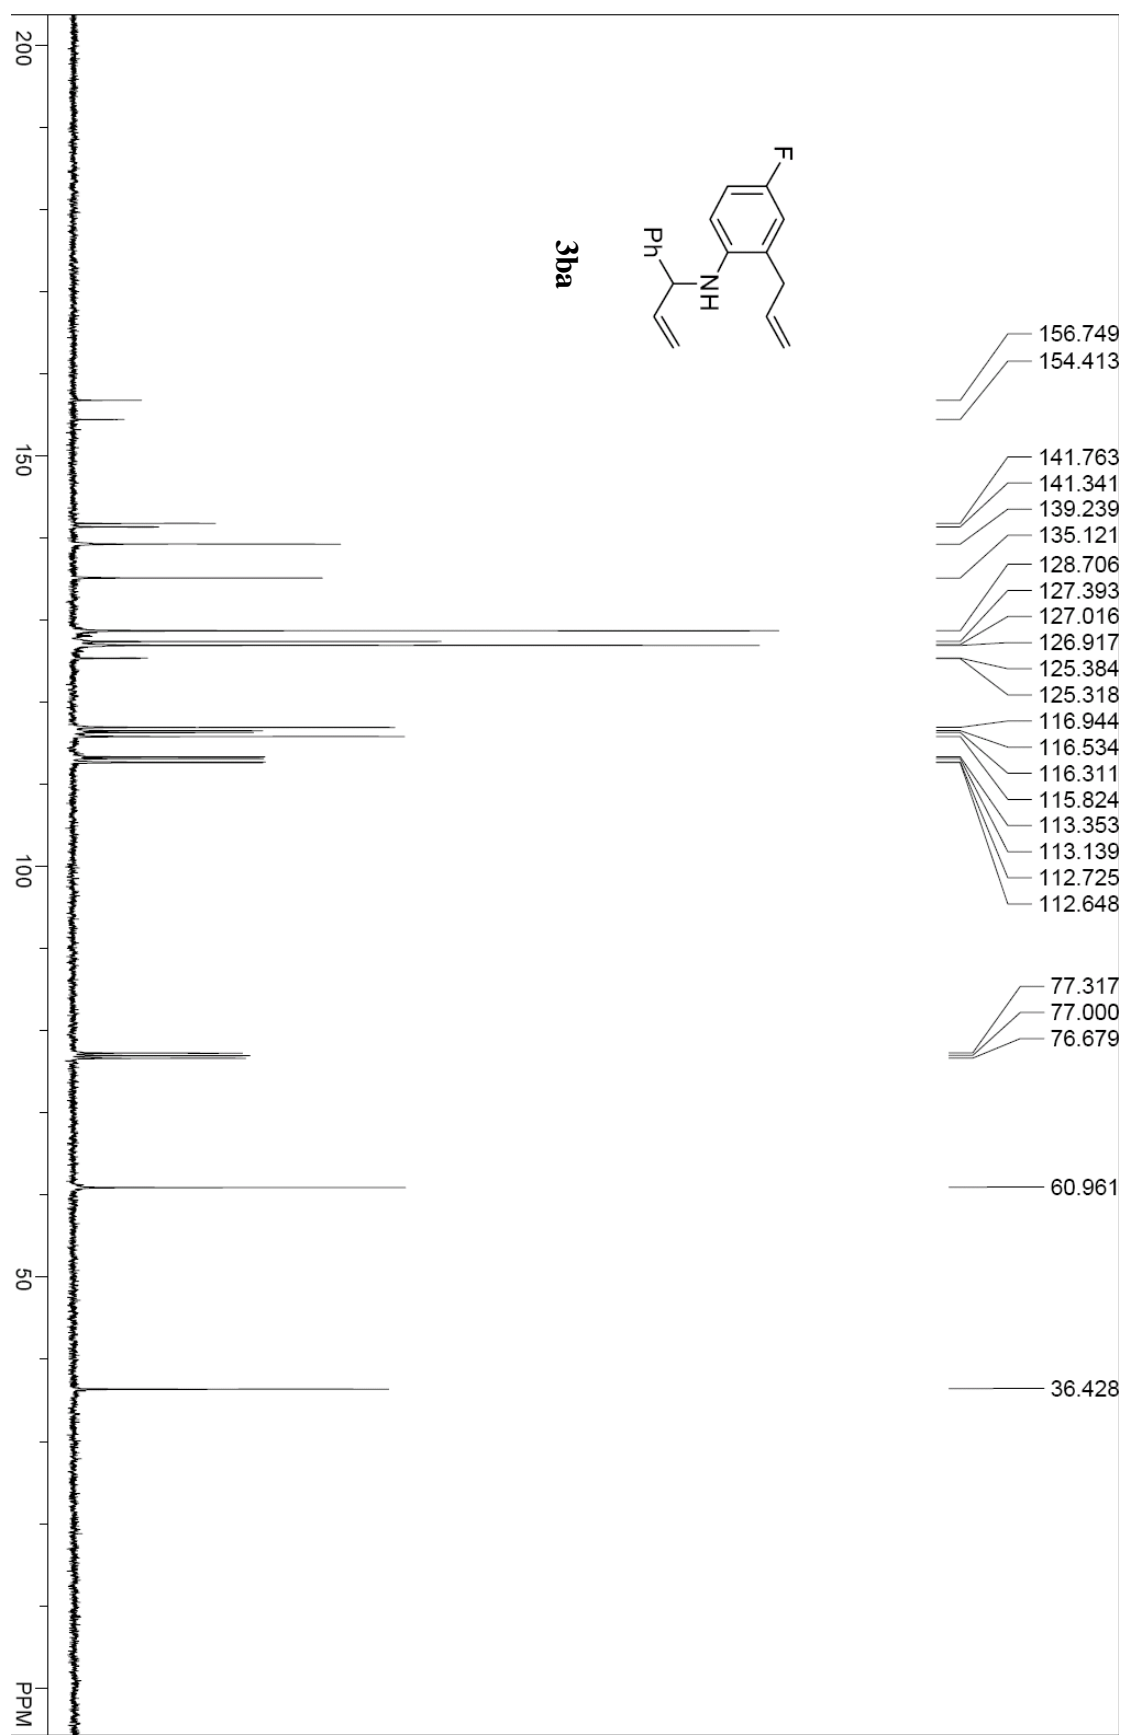

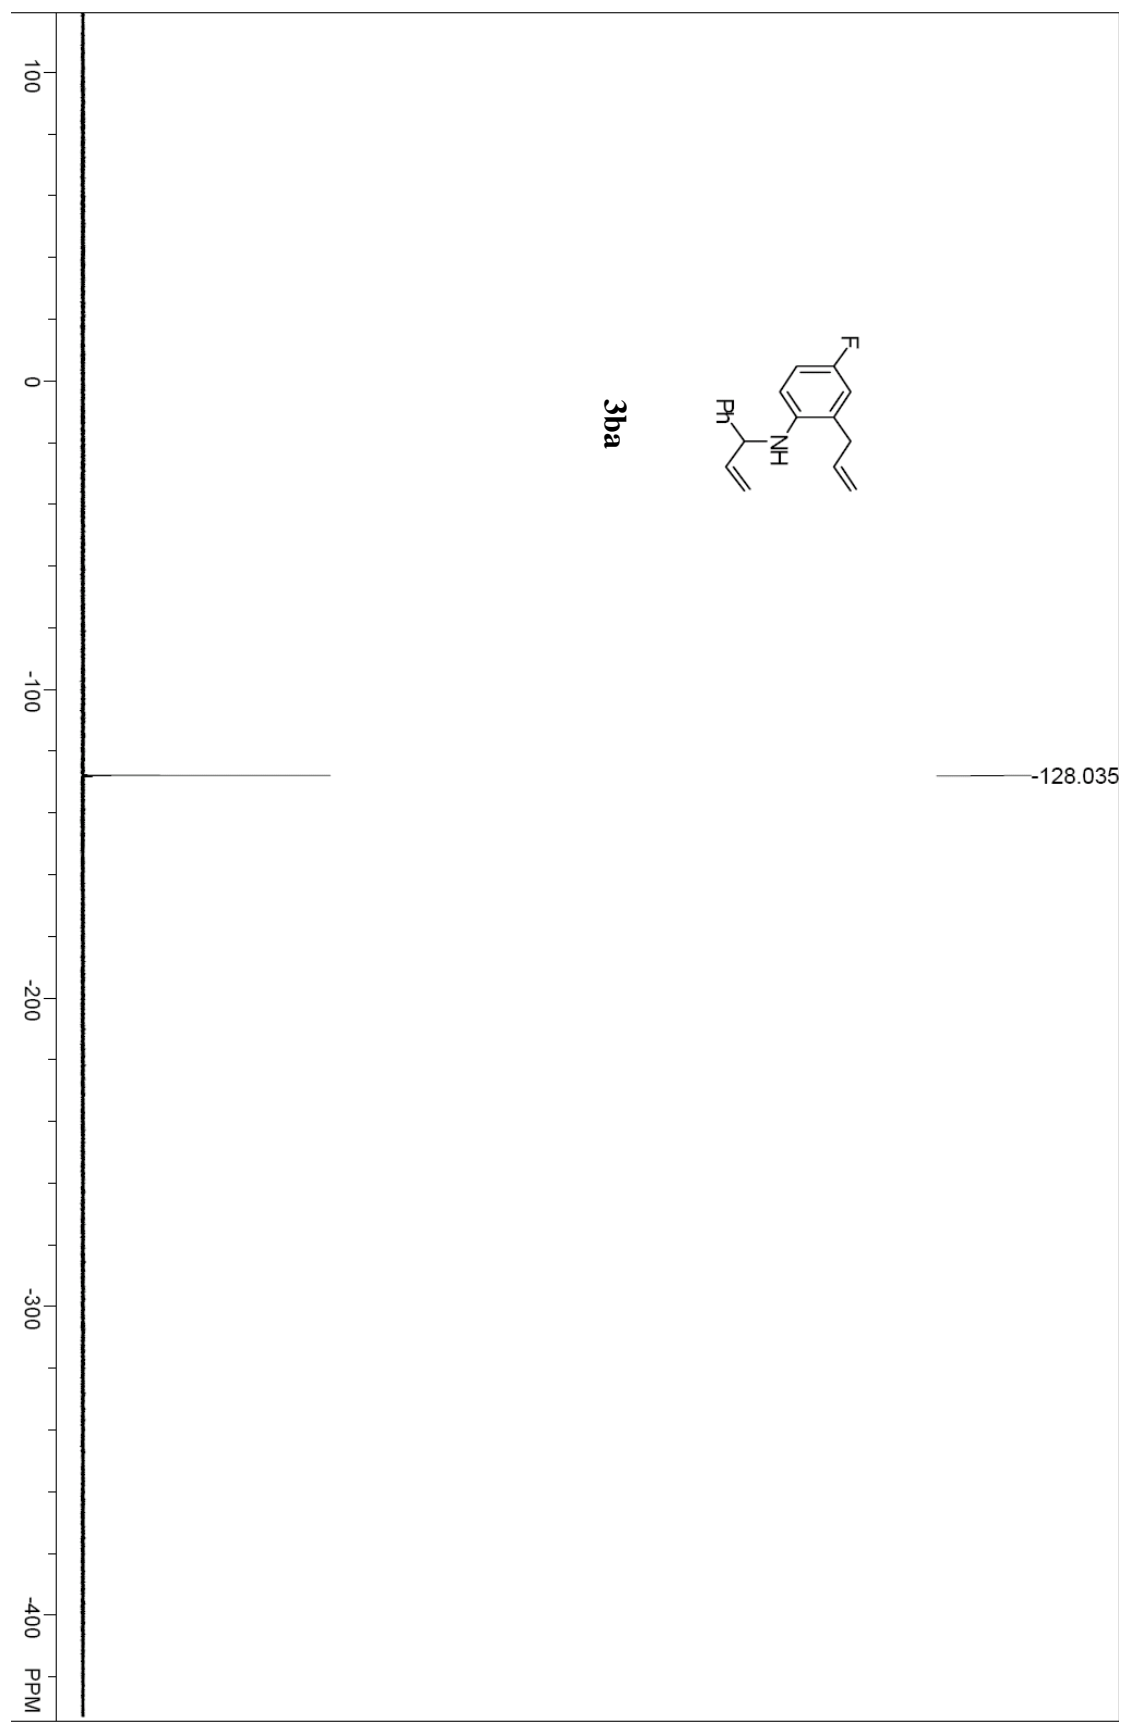

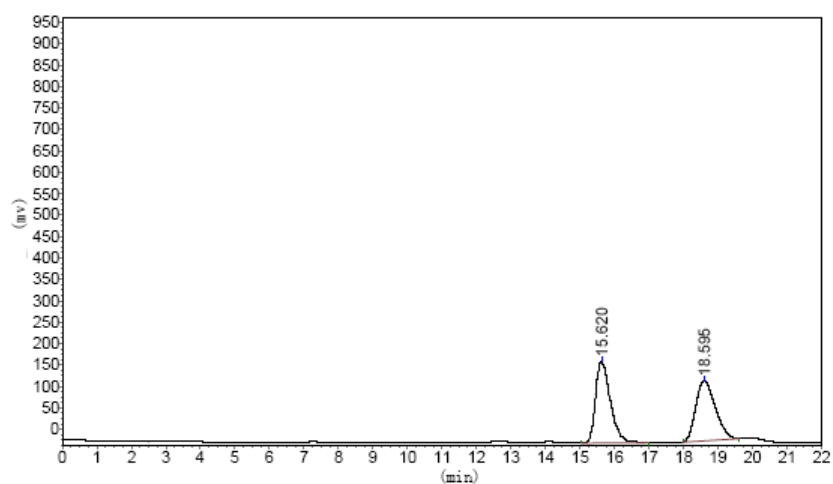

| Peak No. | R. Time | Peak Height | Peak Area    | Percent  |
|----------|---------|-------------|--------------|----------|
| 1        | 15.620  | 191571.453  | 5674707.000  | 50.8229  |
| 2        | 18.595  | 139703.031  | 5490951.500  | 49.1771  |
| Total    |         | 331274.484  | 11165658.500 | 100.0000 |

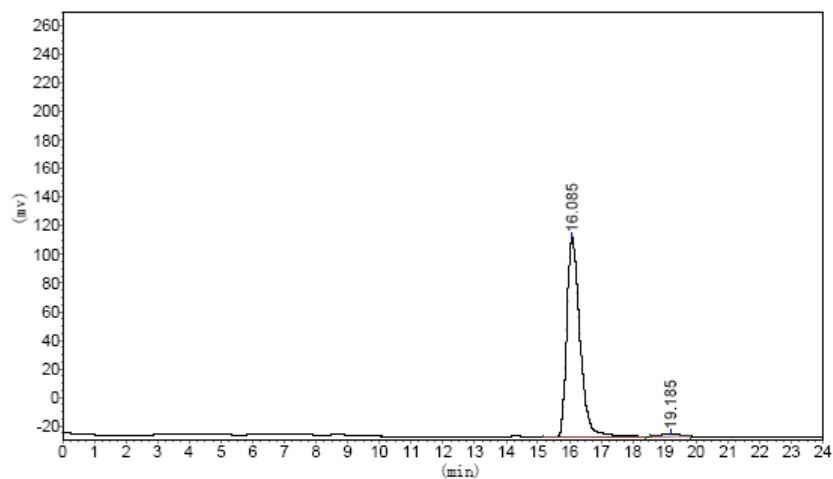

| Peak No. | R. Time | Peak Height | Peak Area   | Percent  |
|----------|---------|-------------|-------------|----------|
| 1        | 16.085  | 140581.094  | 4101513.000 | 98.3618  |
| 2        | 19.185  | 1704.326    | 68310.688   | 1.6382   |
| Total    |         | 142285.420  | 4169823.688 | 100.0000 |

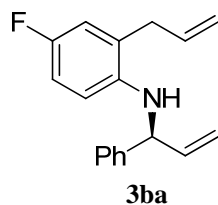

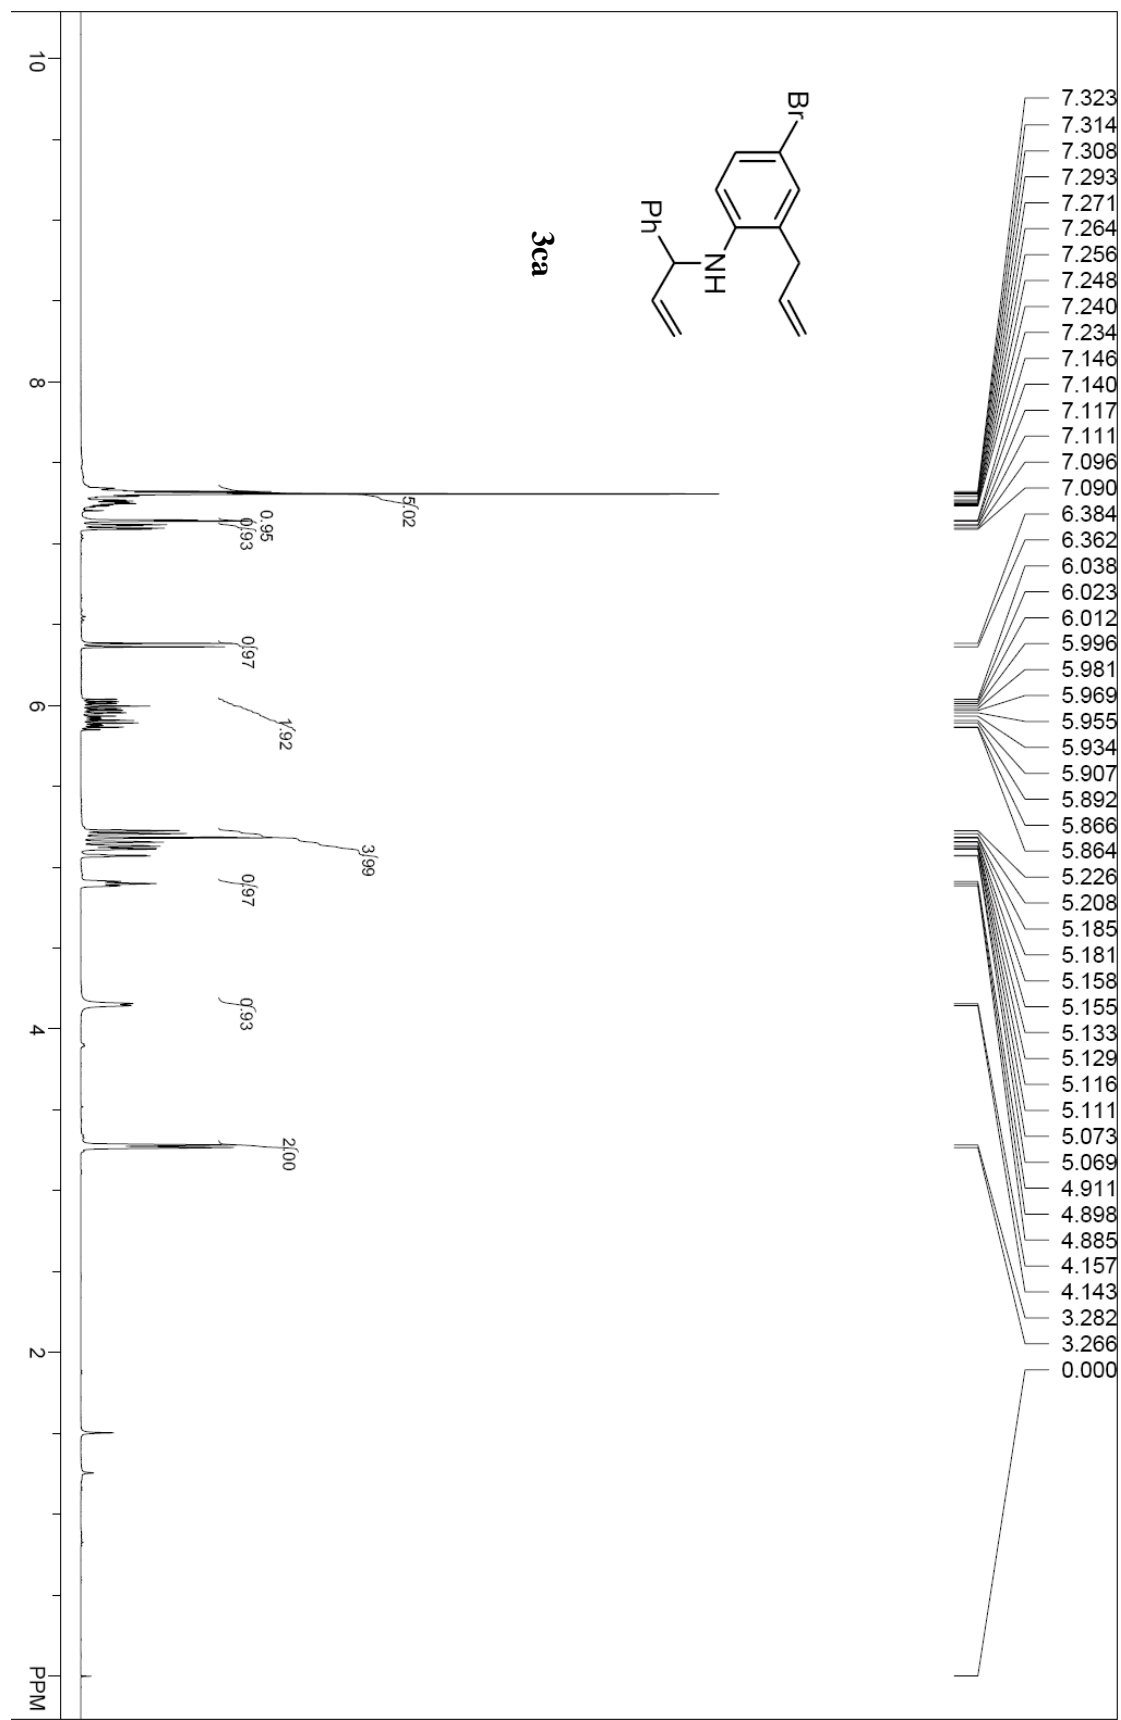

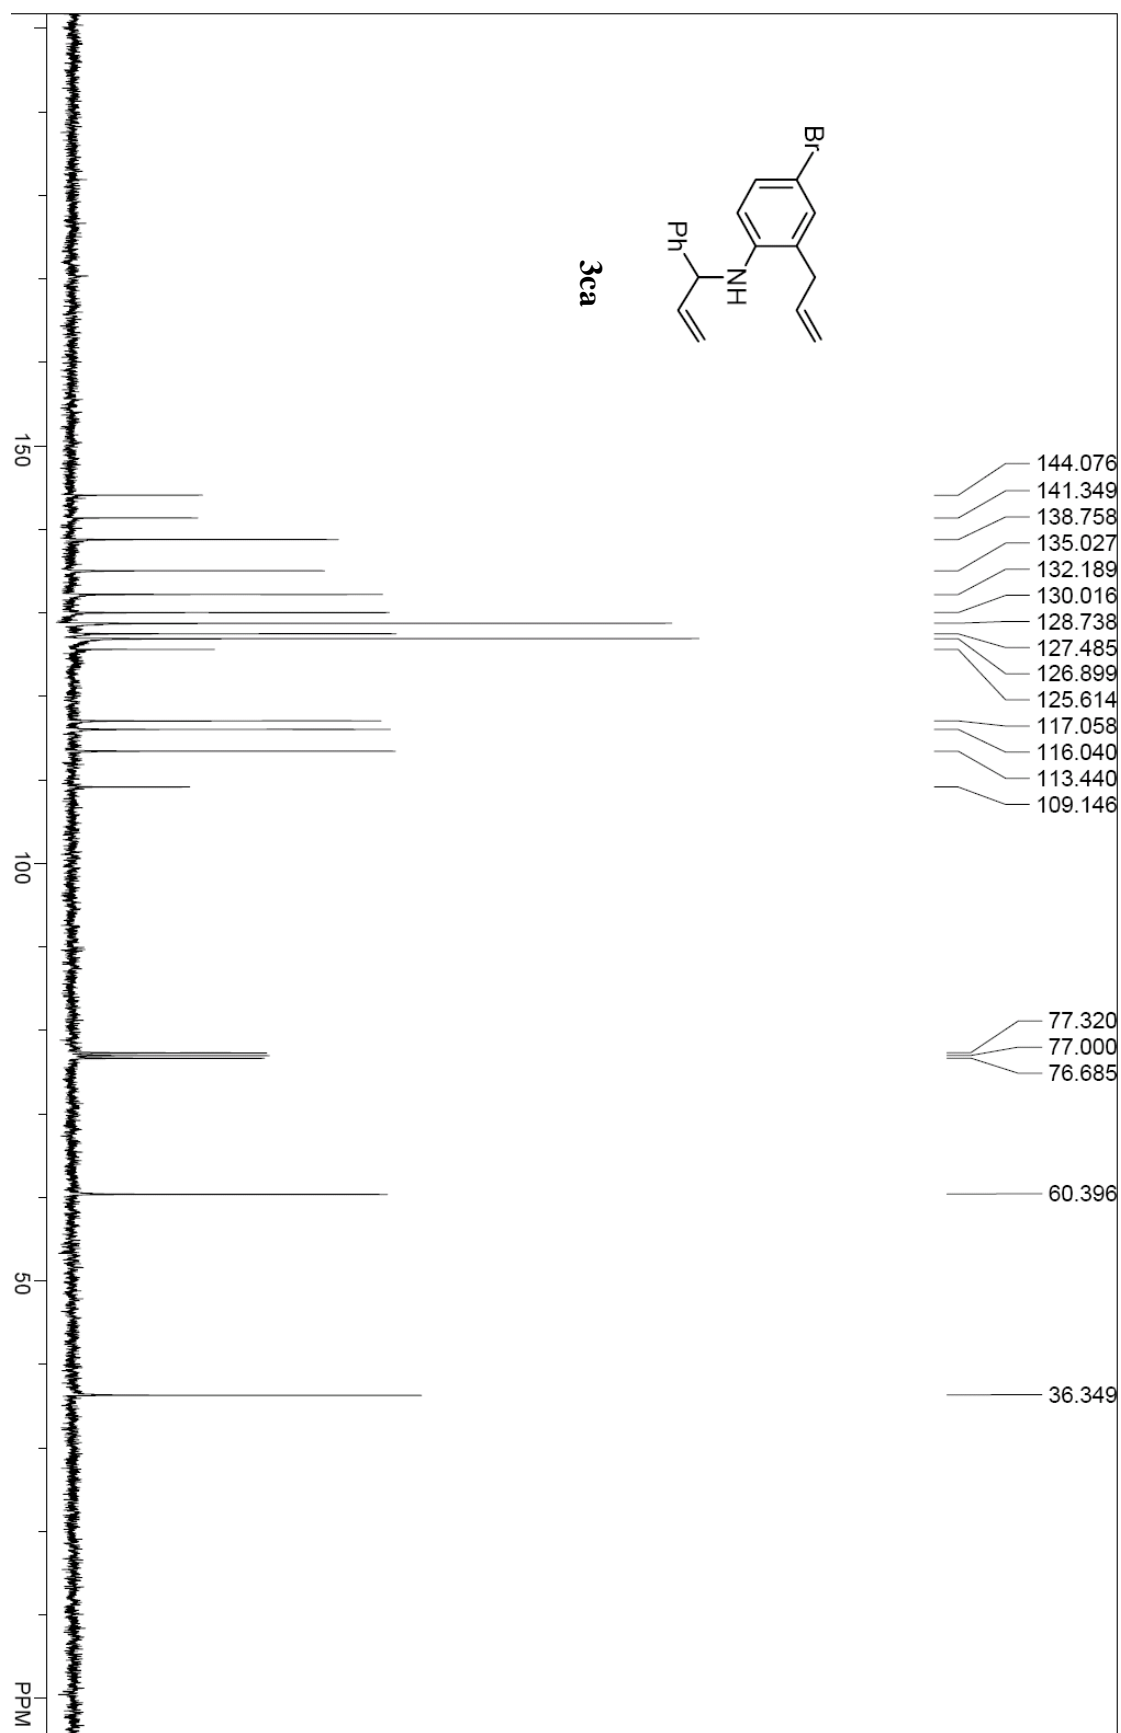

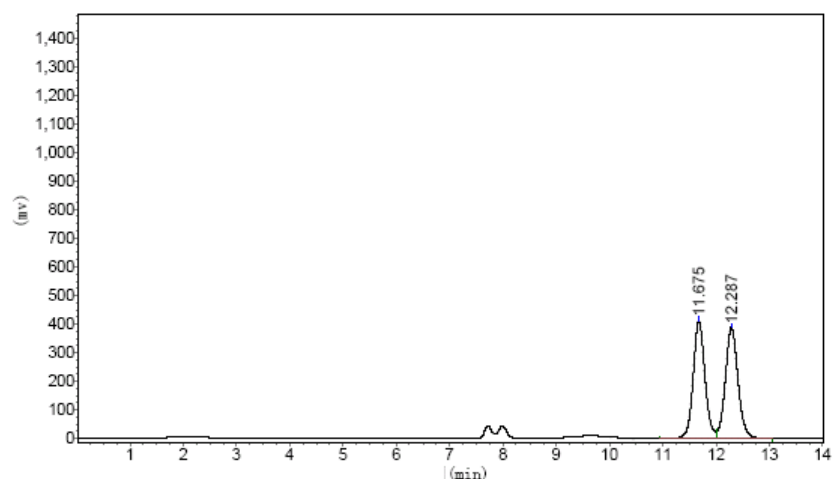

| Peak No.     | R. Time | Peak Height | Peak Area    | Percent  |
|--------------|---------|-------------|--------------|----------|
| 1            | 11.675  | 412172.156  | 6348433.000  | 49.5251  |
| 2            | 12.287  | 389329.781  | 6470176.500  | 50.4749  |
| <b>Total</b> |         | 801501.938  | 12818609.500 | 100.0000 |

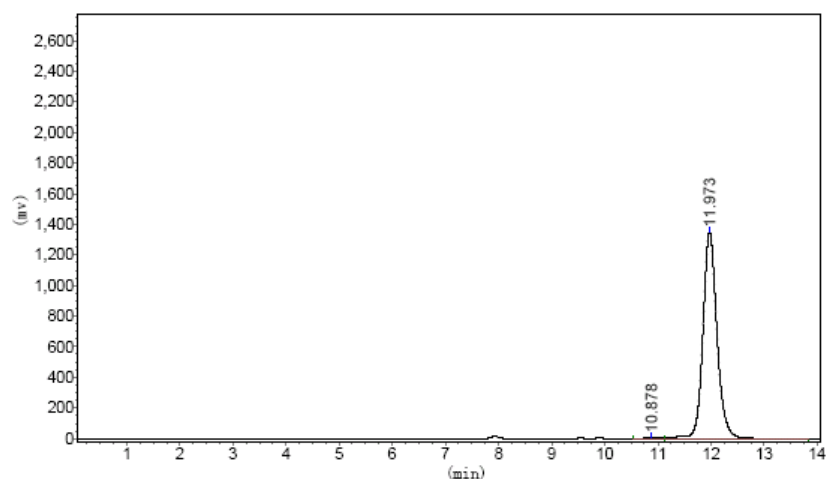

| Peak No.     | R. Time | Peak Height | Peak Area    | Percent  |
|--------------|---------|-------------|--------------|----------|
| 1            | 10.878  | 11124.292   | 173172.359   | 0.6874   |
| 2            | 11.973  | 1353801.000 | 25017372.000 | 99.3126  |
| <b>Total</b> |         | 1364925.292 | 25190544.359 | 100.0000 |

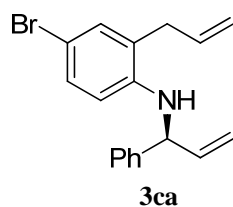



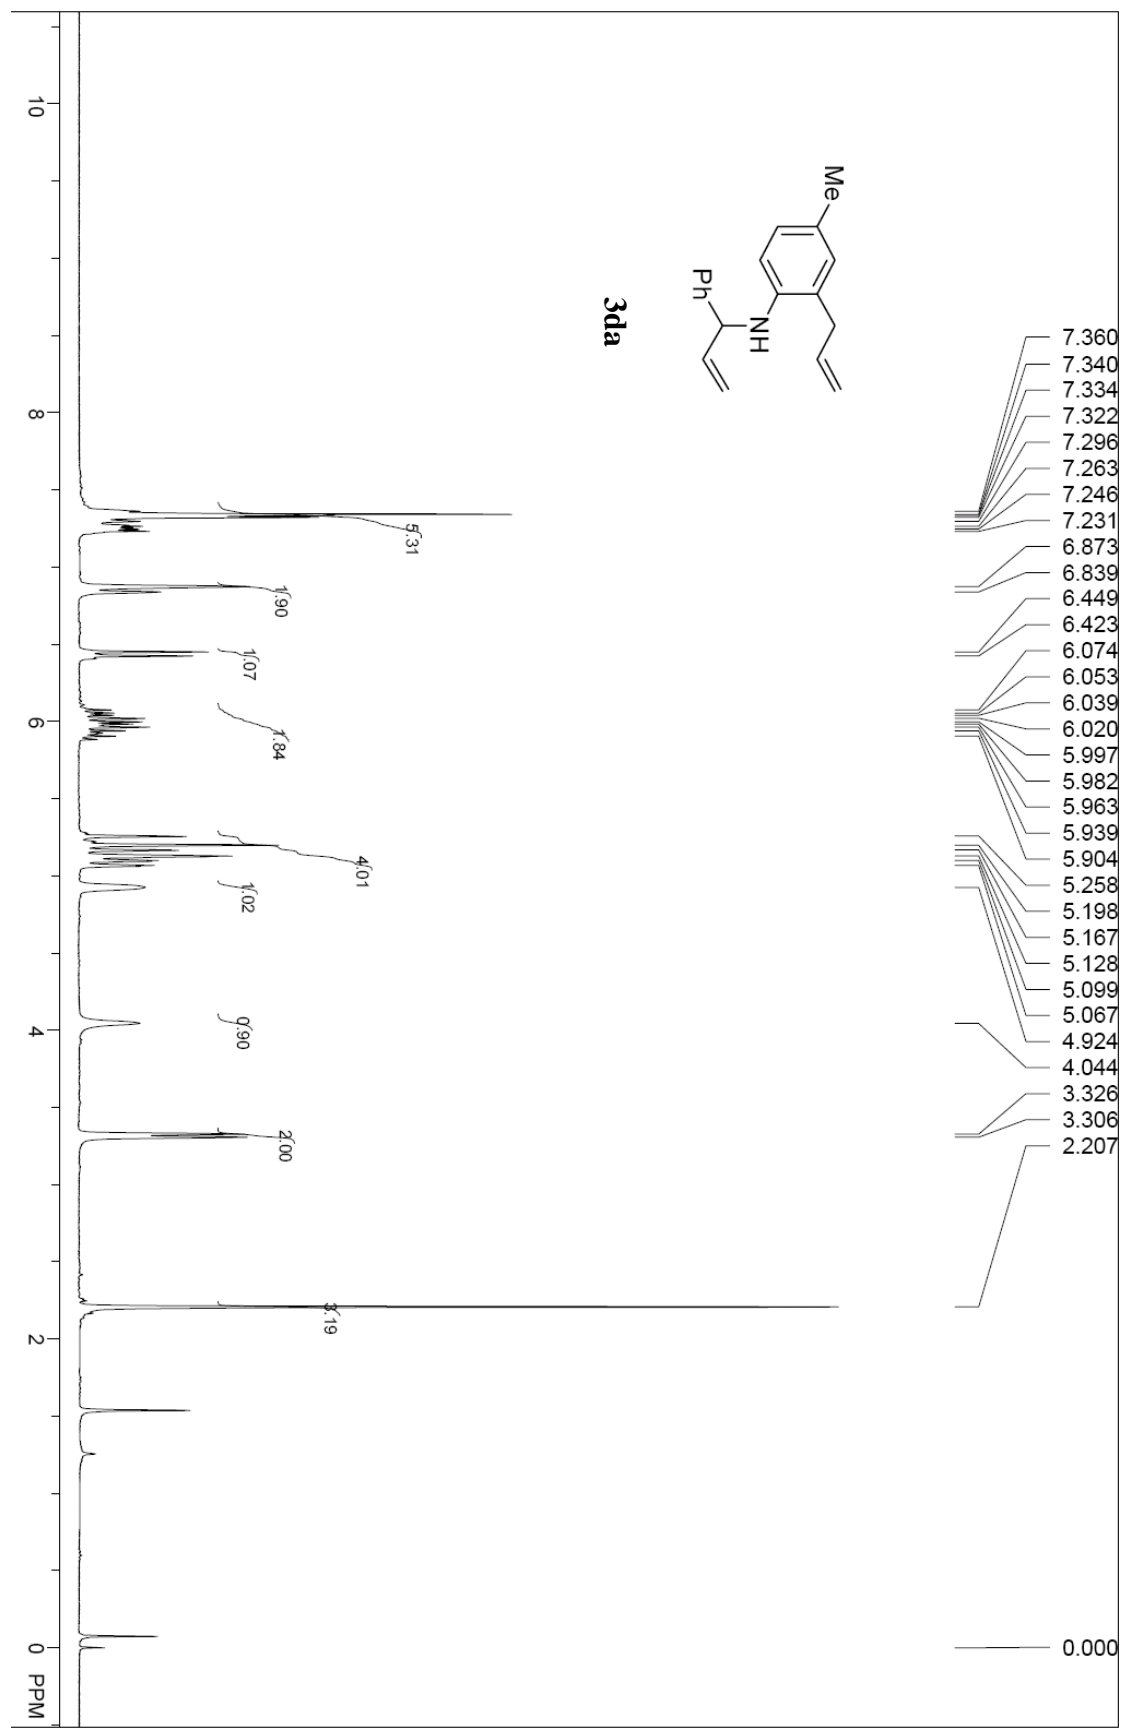

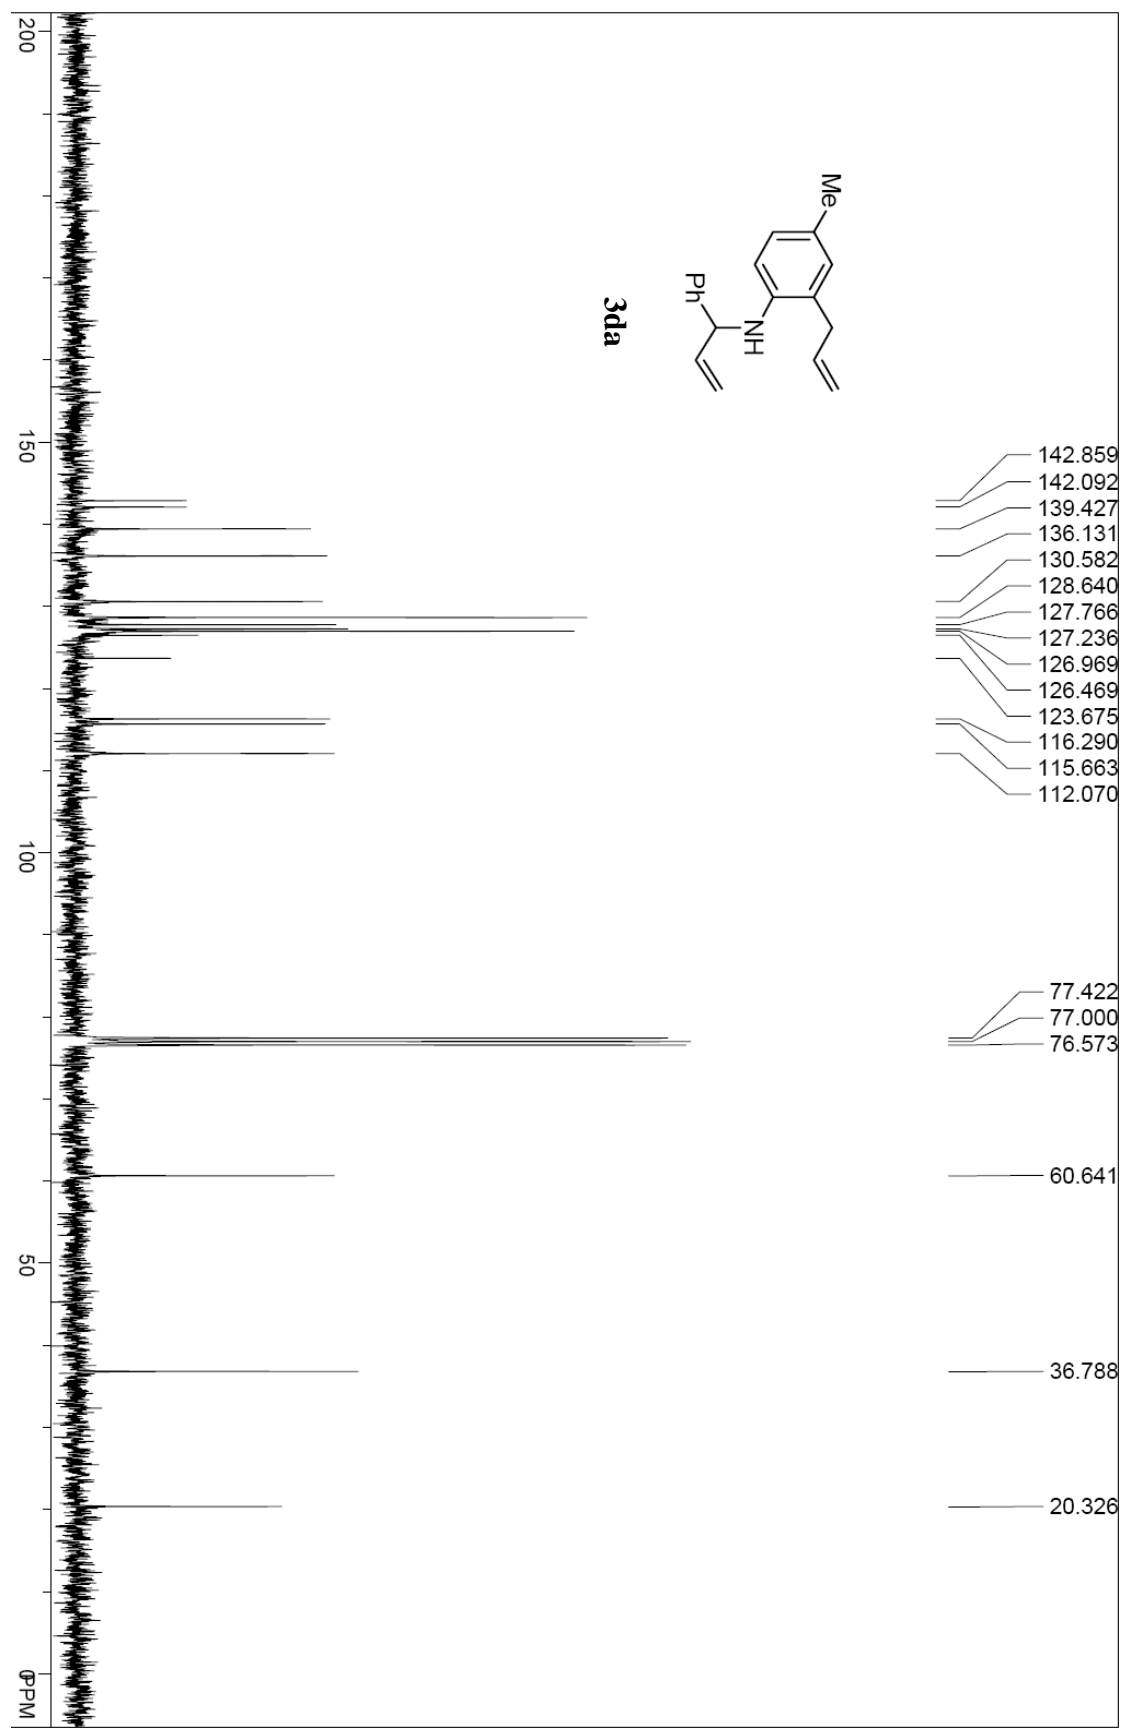

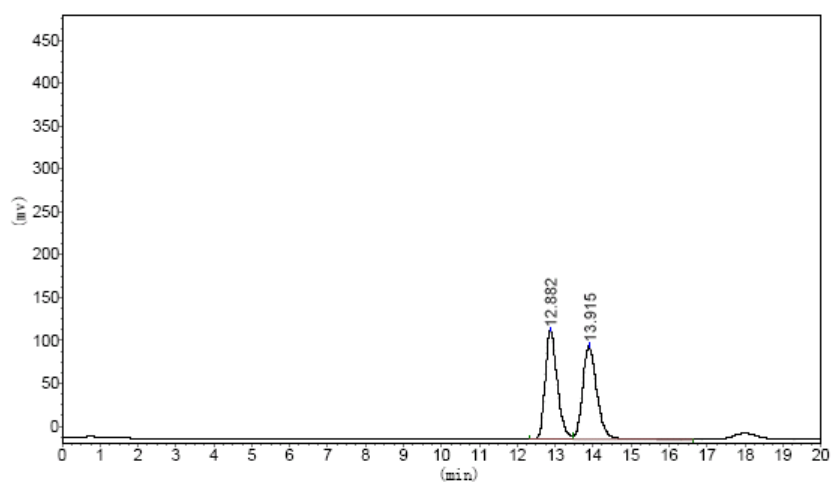

| Peak No.     | R. Time | Peak Height | Peak Area   | Percent  |
|--------------|---------|-------------|-------------|----------|
| 1            | 12.882  | 125628.461  | 2798852.250 | 49.7356  |
| 2            | 13.915  | 108350.445  | 2828612.250 | 50.2644  |
| <b>Total</b> |         | 233978.906  | 5627464.500 | 100.0000 |

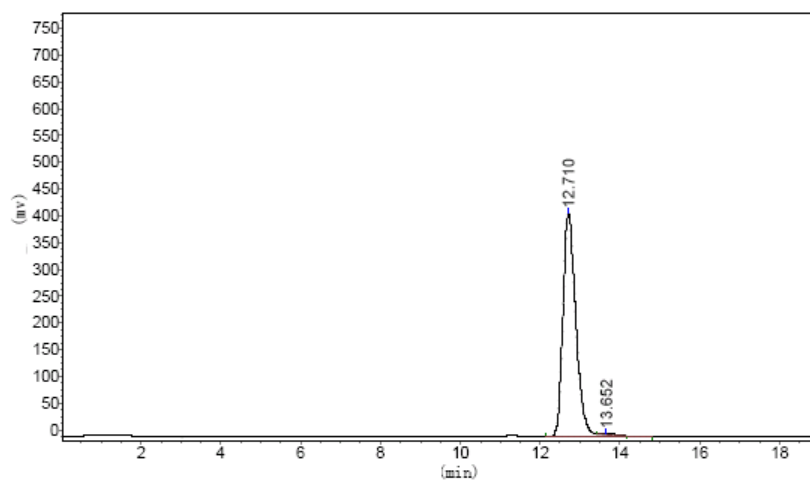

| Peak No.     | R. Time | Peak Height | Peak Area   | Percent  |
|--------------|---------|-------------|-------------|----------|
| 1            | 12.710  | 417236.594  | 9490659.000 | 99.3569  |
| 2            | 13.652  | 2860.412    | 61431.402   | 0.6431   |
| <b>Total</b> |         | 420097.006  | 9552090.402 | 100.0000 |

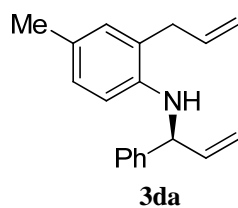

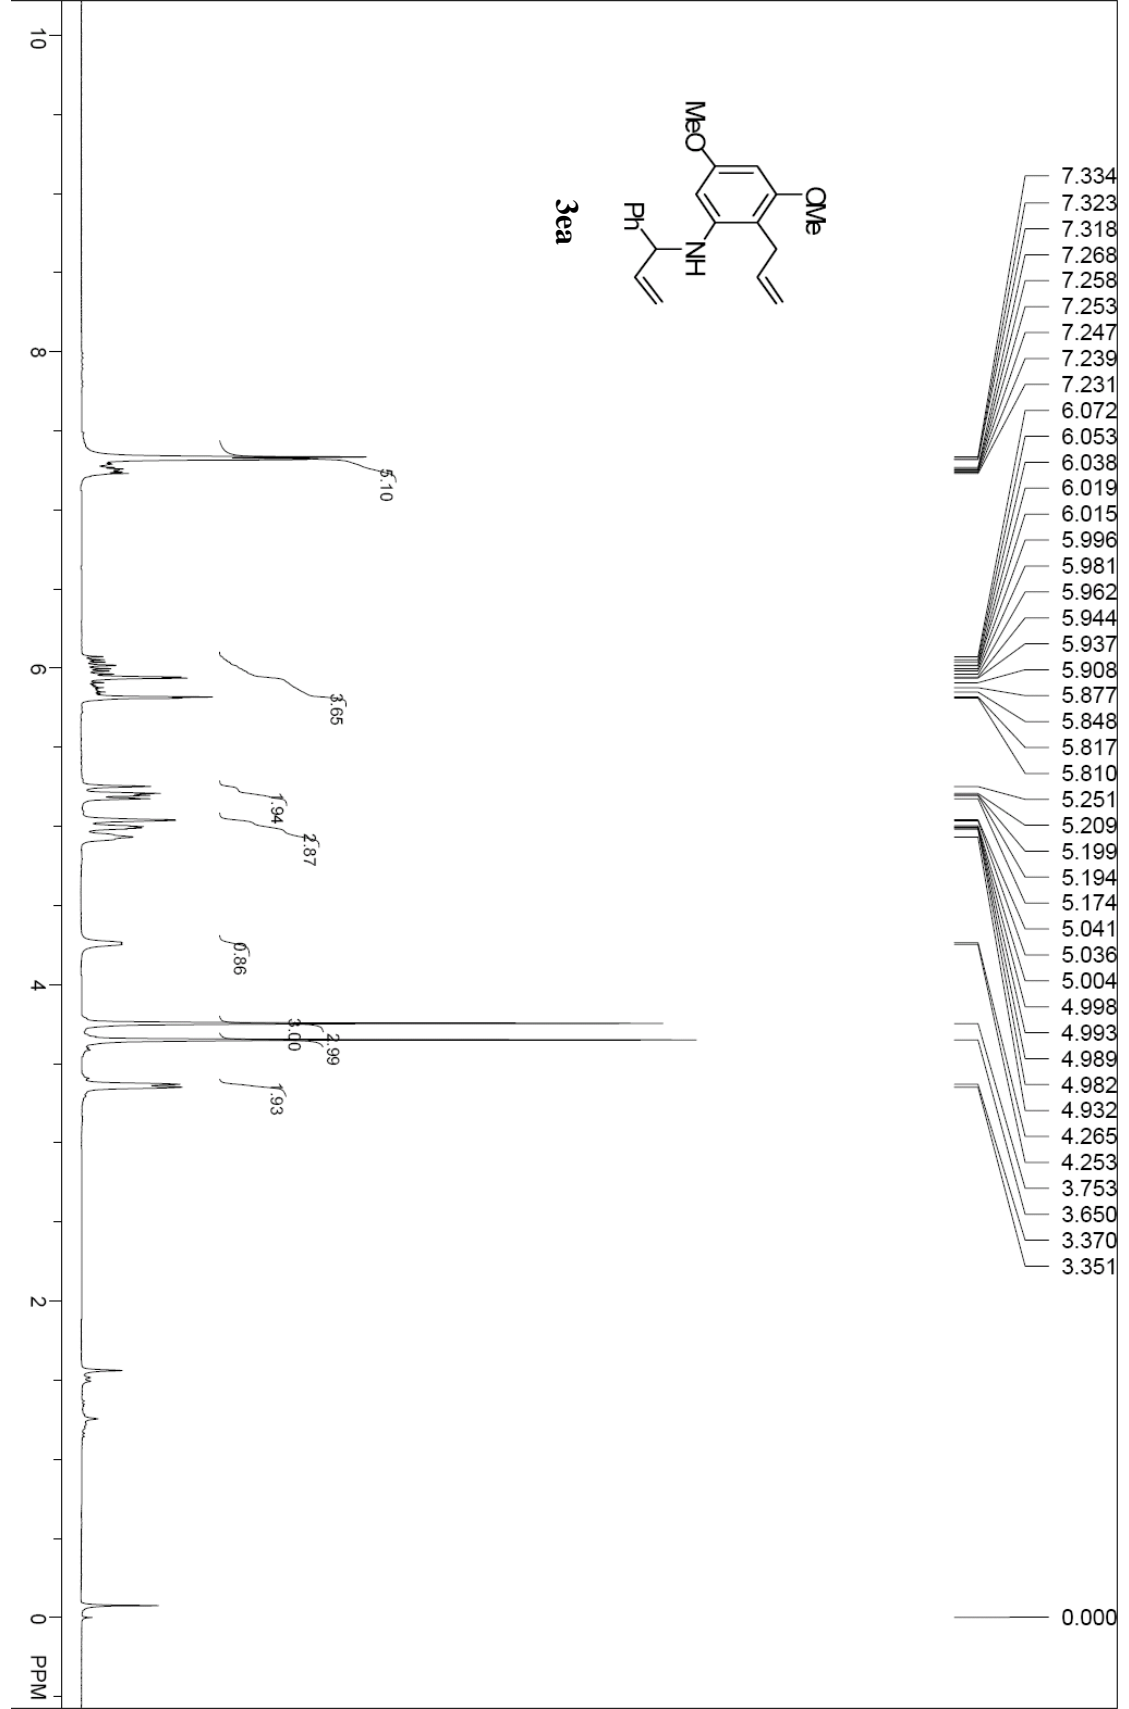

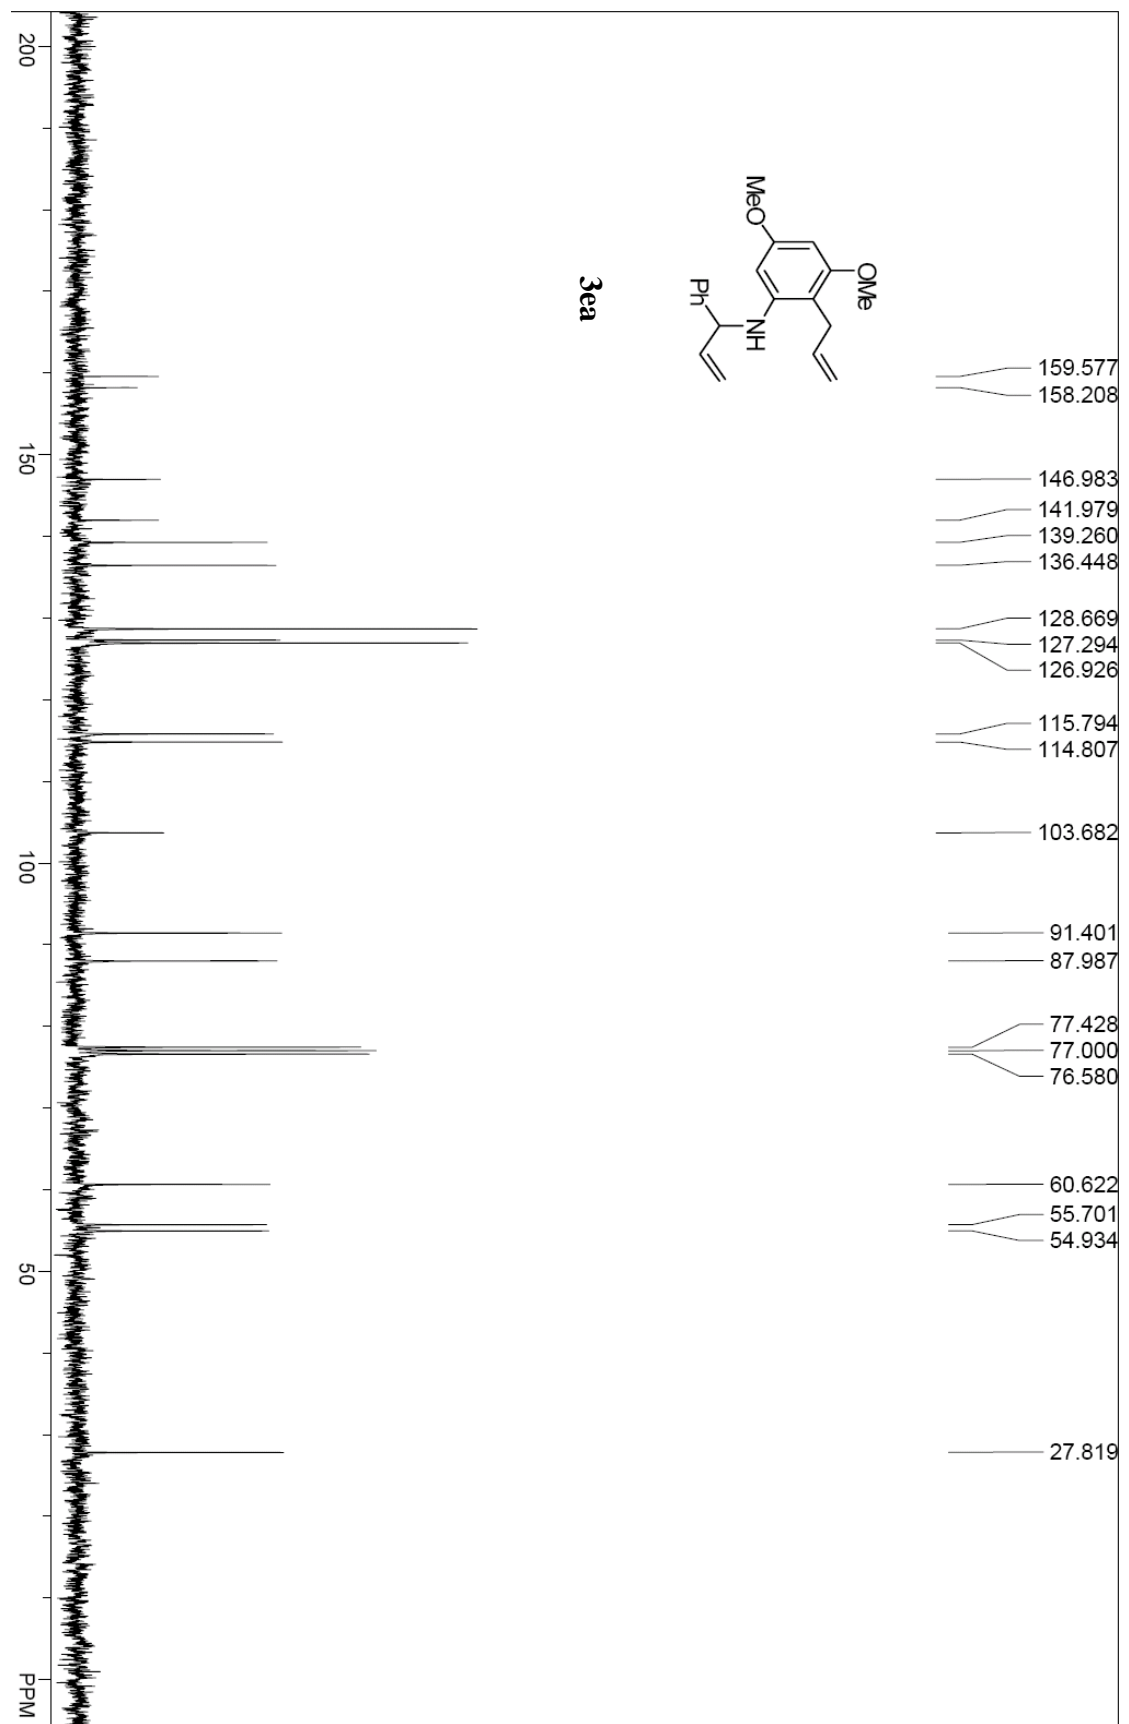

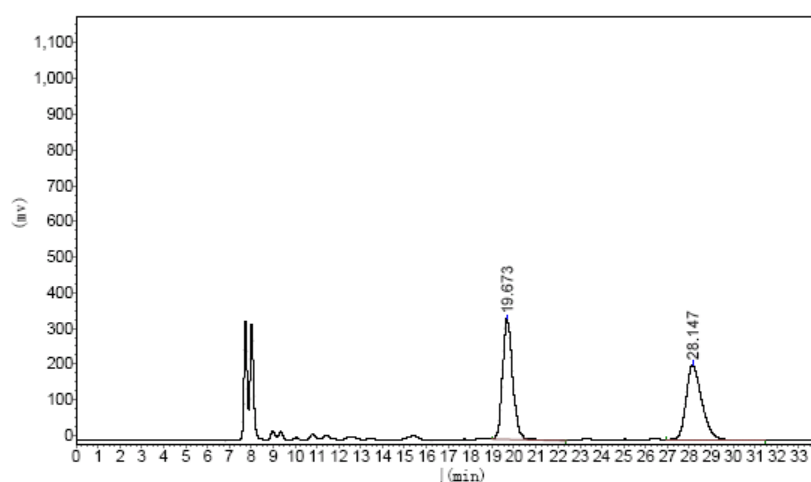

| Peak No.     | R. Time | Peak Height | Peak Area    | Percent  |
|--------------|---------|-------------|--------------|----------|
| 1            | 19.673  | 337682.938  | 10956902.000 | 50.2637  |
| 2            | 28.147  | 212913.719  | 10841945.000 | 49.7363  |
| <b>Total</b> |         | 550596.656  | 21798847.000 | 100.0000 |

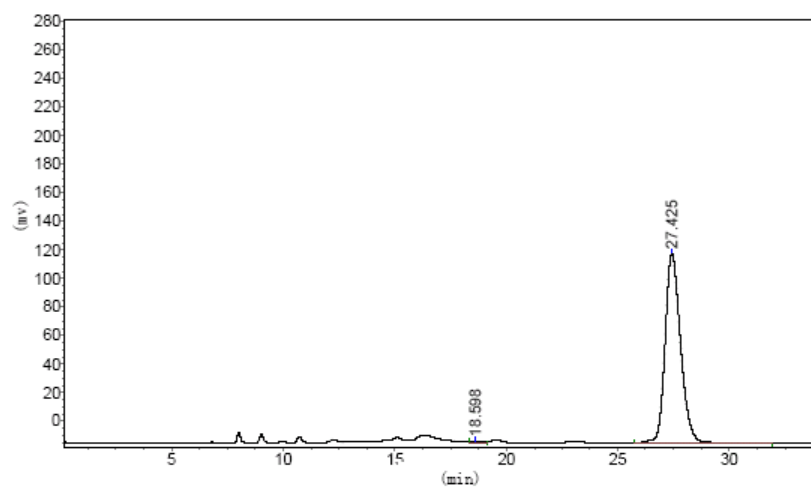

| Peak No.     | R. Time | Peak Height | Peak Area   | Percent  |
|--------------|---------|-------------|-------------|----------|
| 1            | 18.598  | 1157.174    | 48323.477   | 0.7448   |
| 2            | 27.425  | 133242.250  | 6439970.500 | 99.2552  |
| <b>Total</b> |         | 134399.424  | 6488293.977 | 100.0000 |

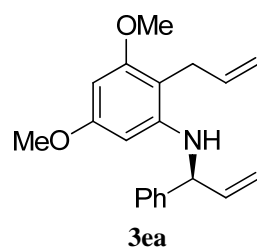

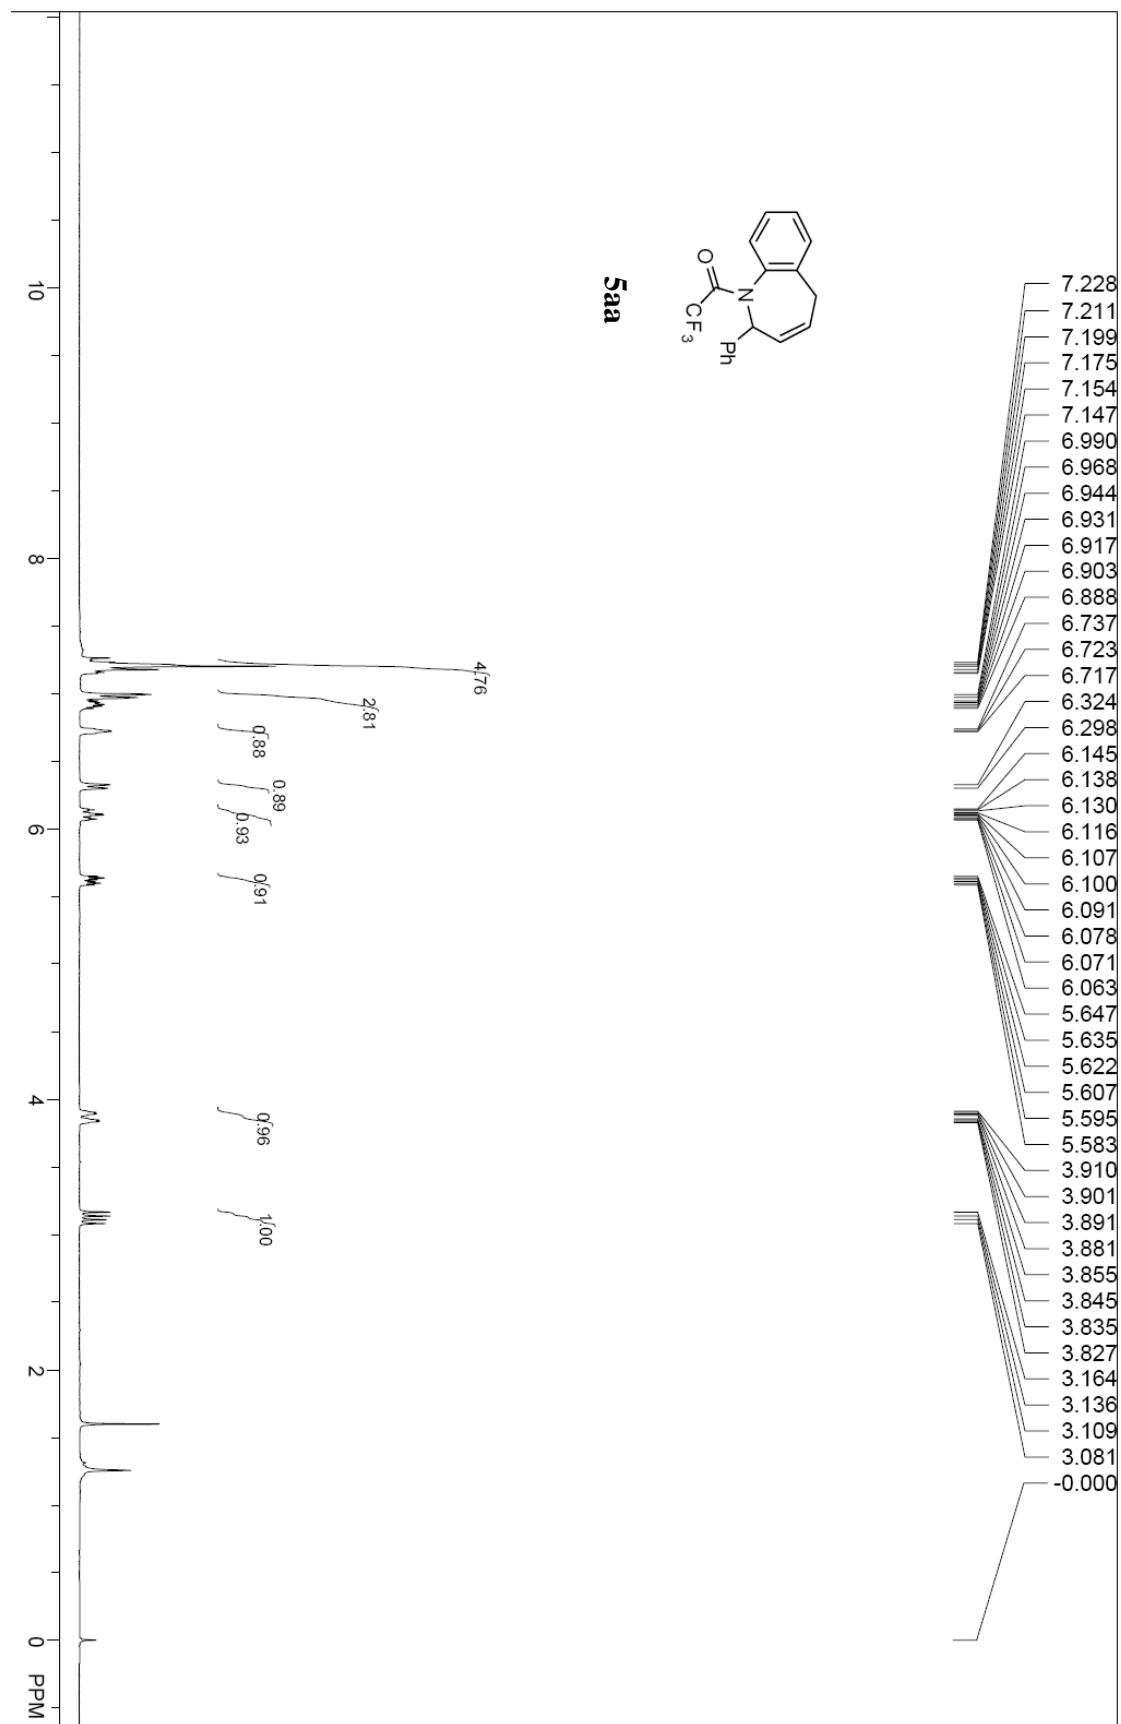

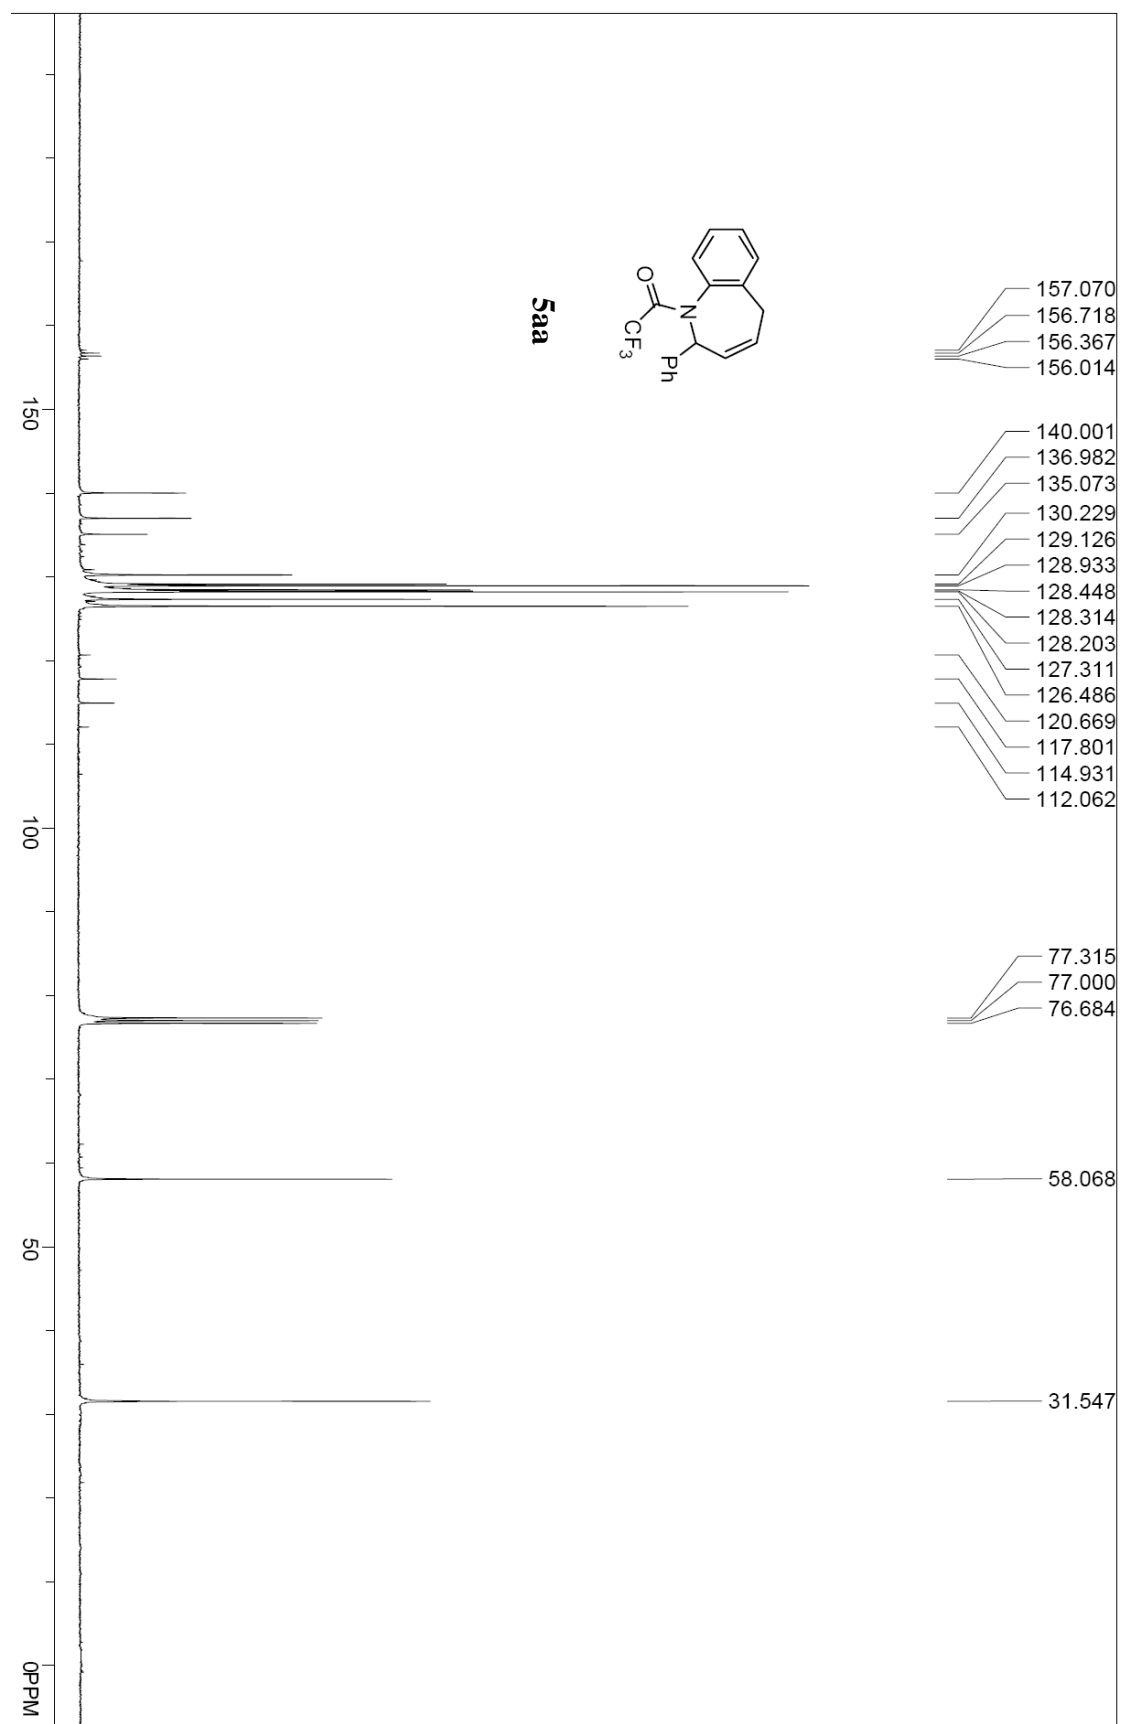



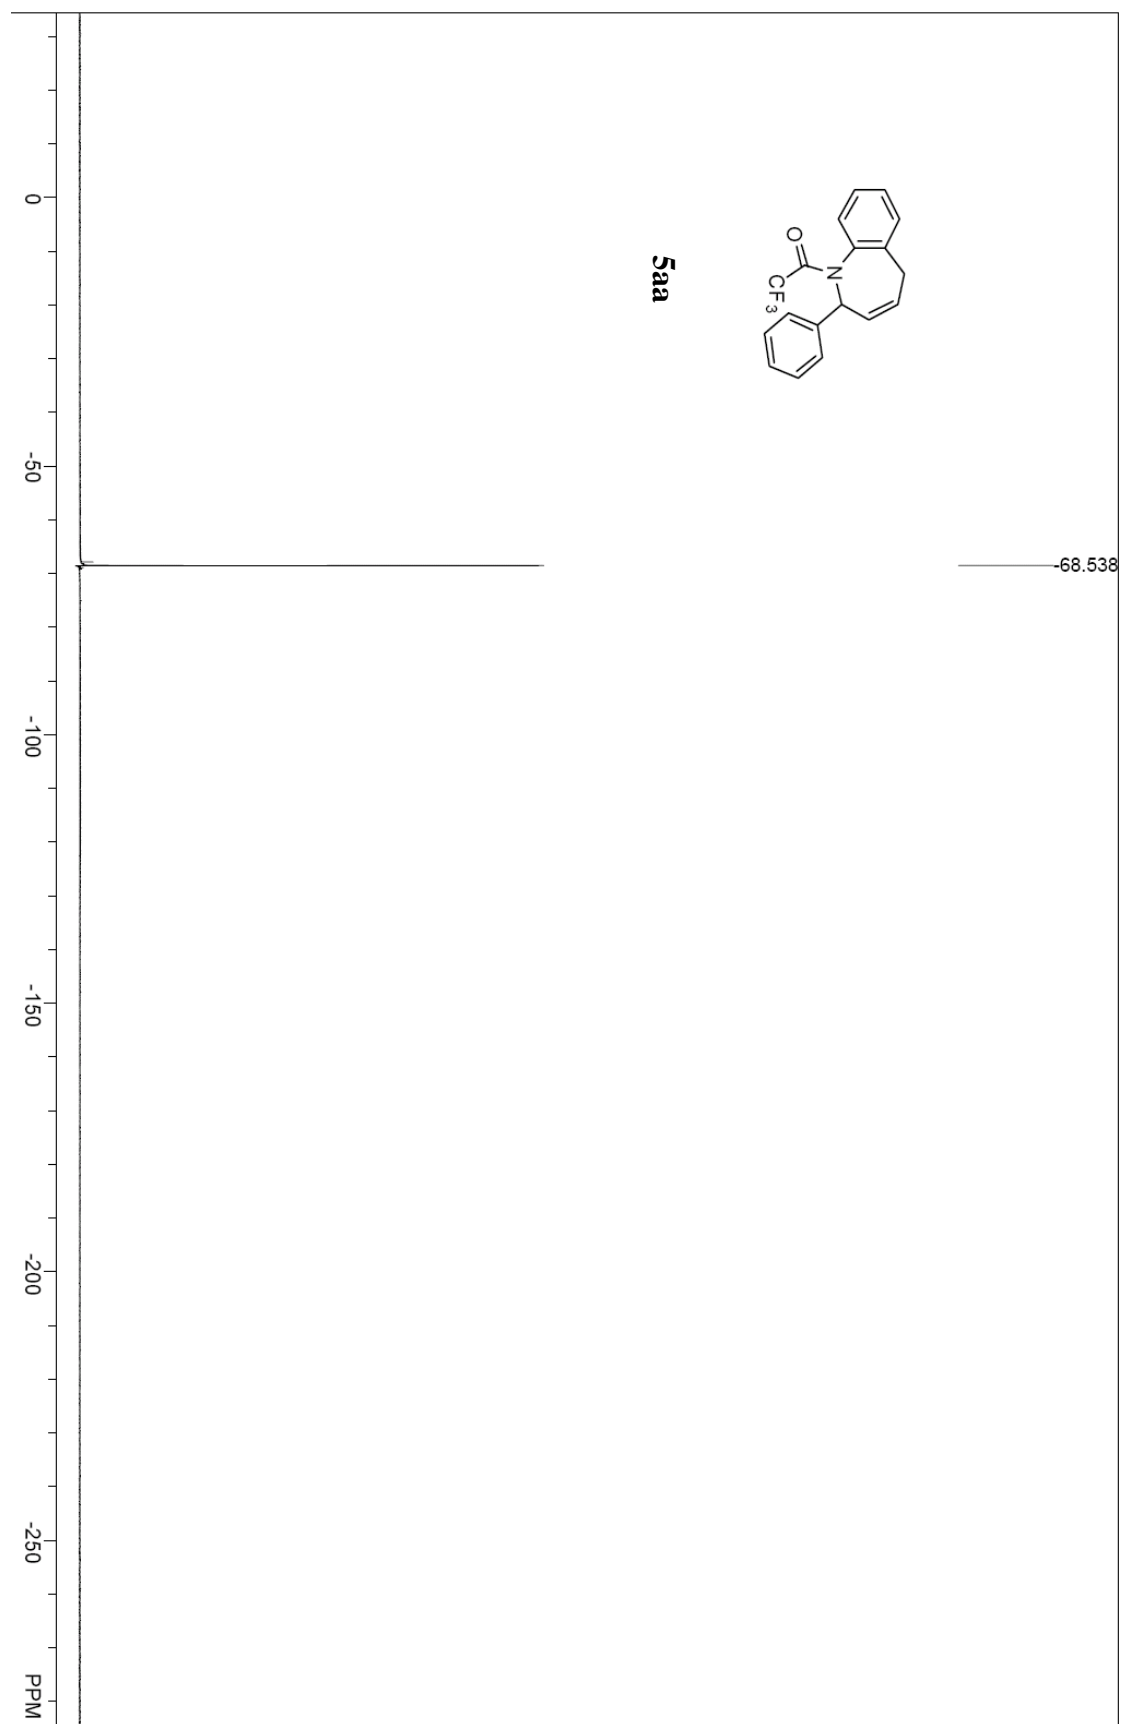

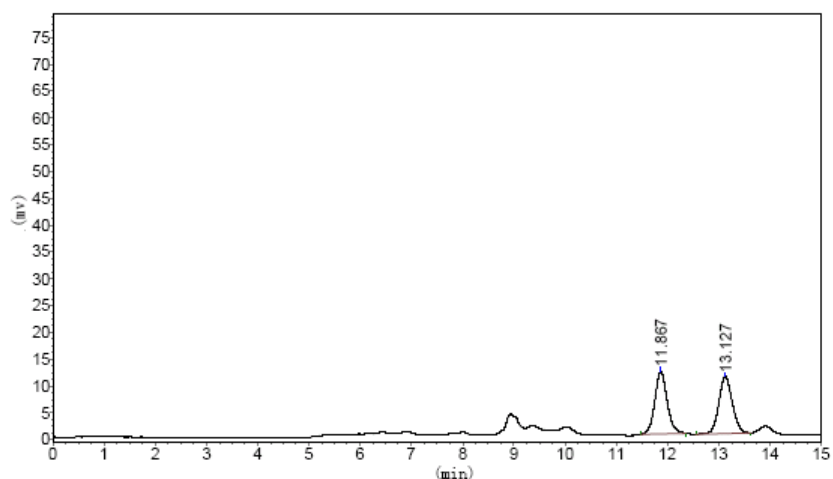

| Peak No.     | R. Time | Peak Height | Peak Area  | Percent  |
|--------------|---------|-------------|------------|----------|
| 1            | 11.867  | 11641.022   | 195216.031 | 50.1069  |
| 2            | 13.127  | 10604.977   | 194382.813 | 49.8931  |
| <b>Total</b> |         | 22245.999   | 389598.844 | 100.0000 |

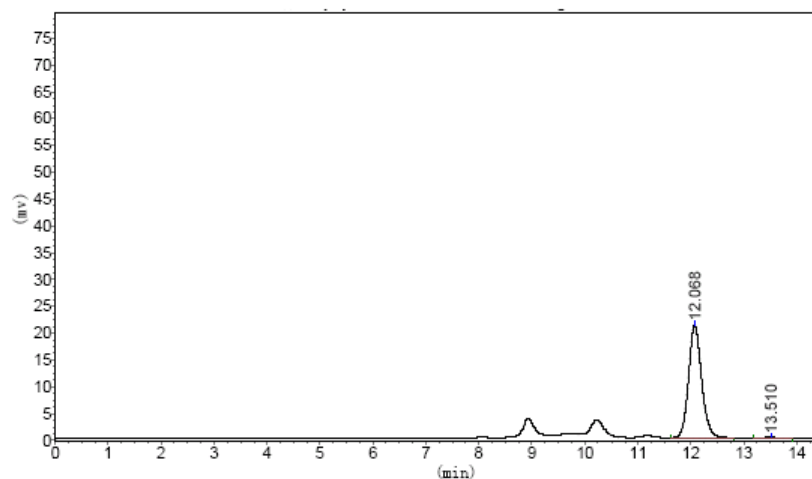

| Peak No.     | R. Time | Peak Height | Peak Area  | Percent  |
|--------------|---------|-------------|------------|----------|
| 1            | 12.068  | 20985.512   | 360599.625 | 99.2648  |
| 2            | 13.510  | 142.966     | 2670.801   | 0.7352   |
| <b>Total</b> |         | 21128.478   | 363270.426 | 100.0000 |

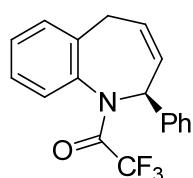

**5aa**

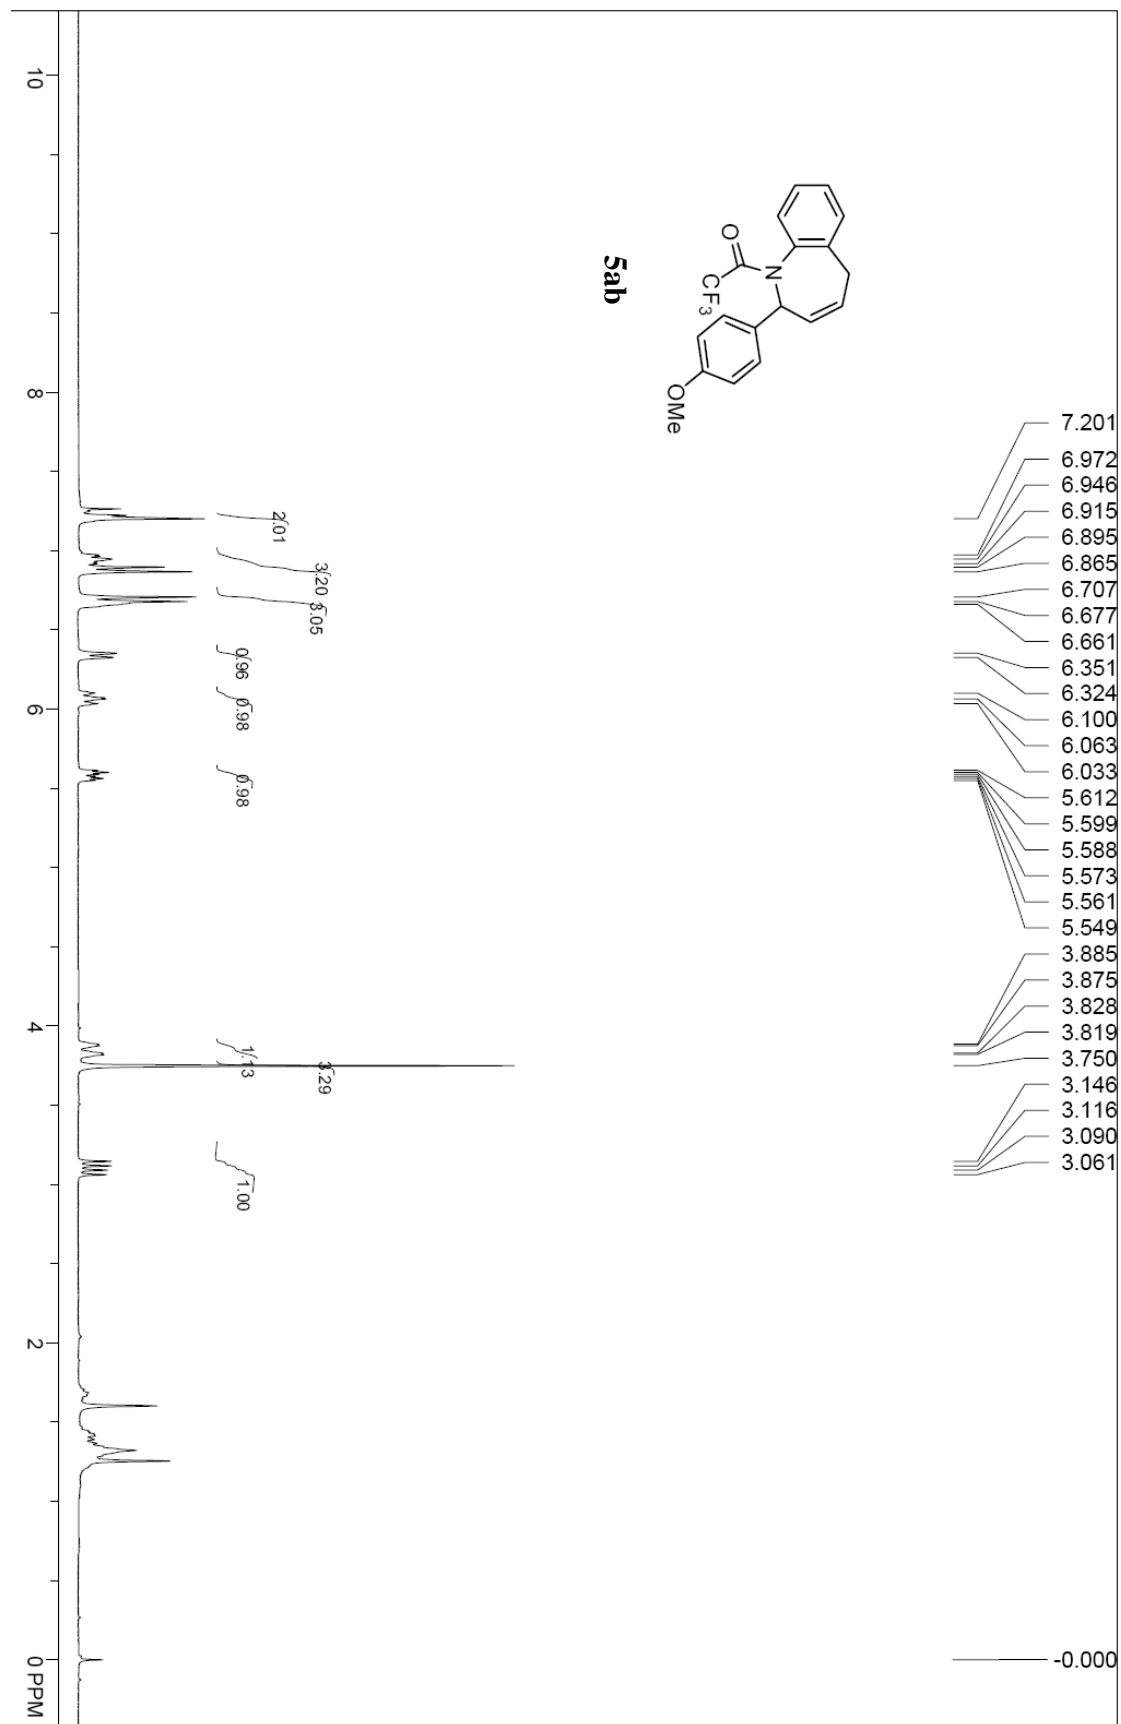

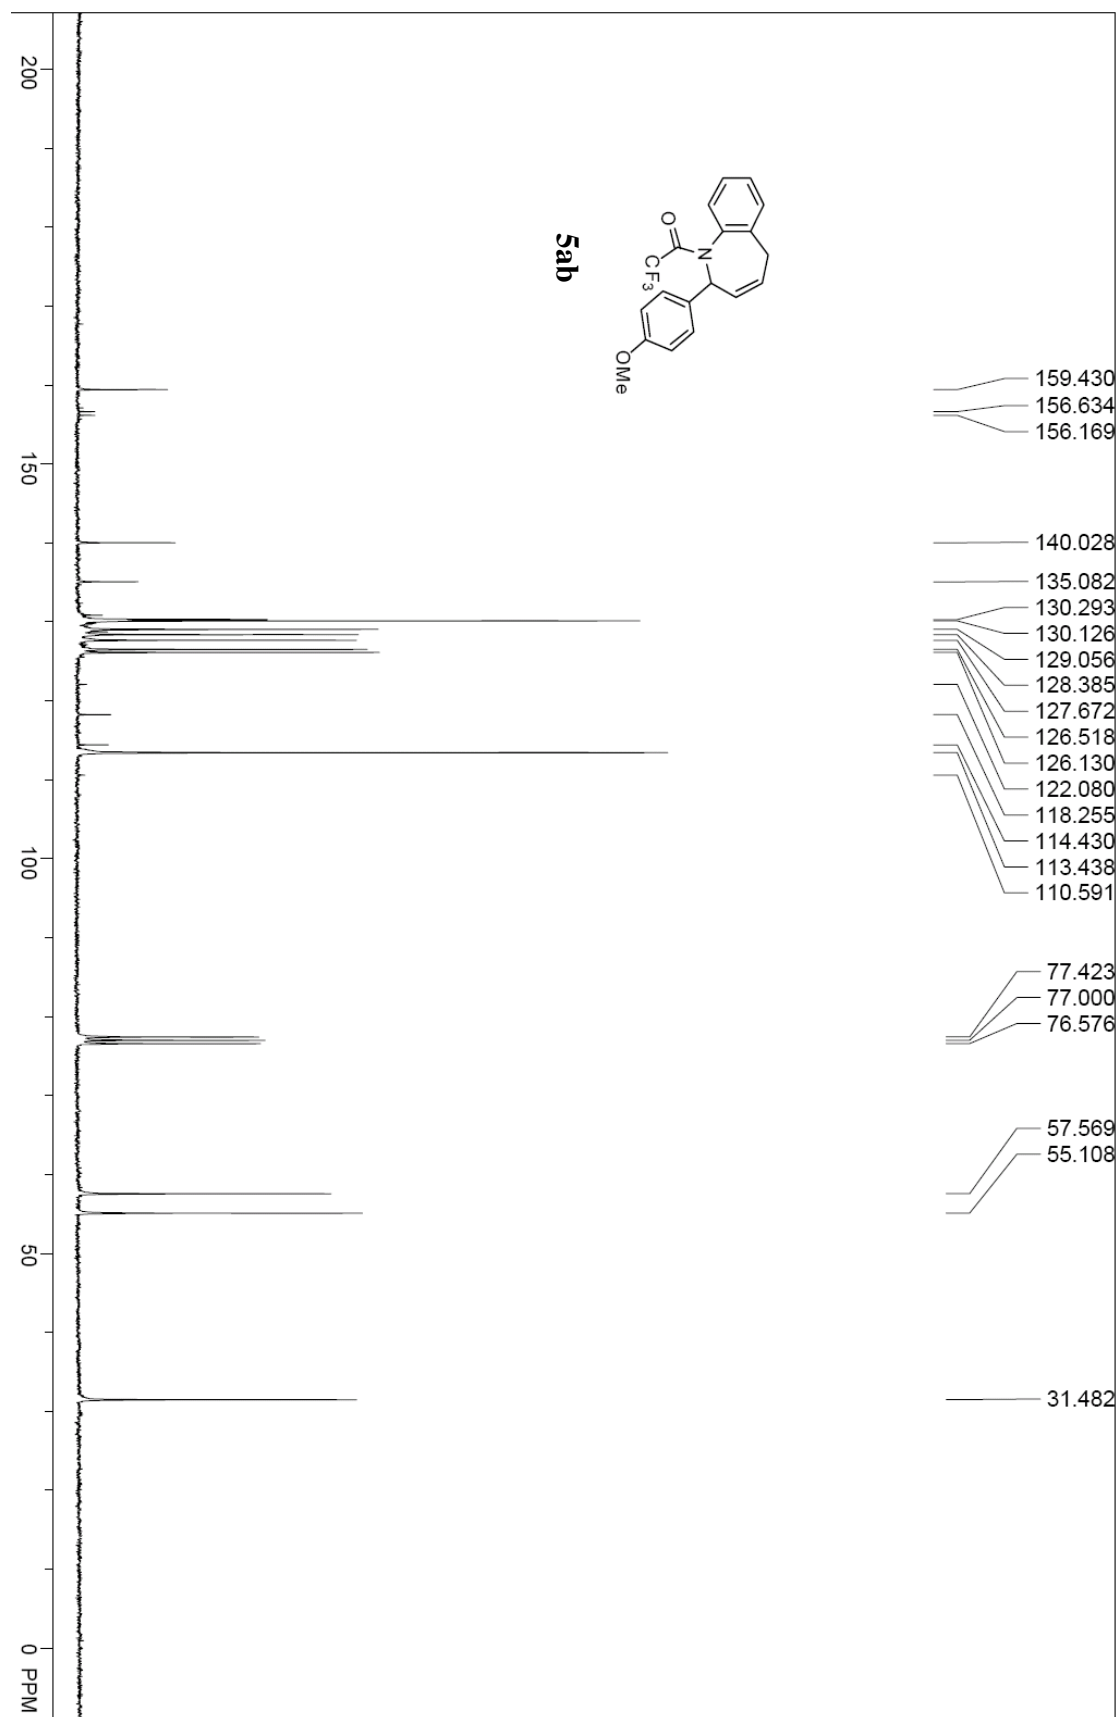

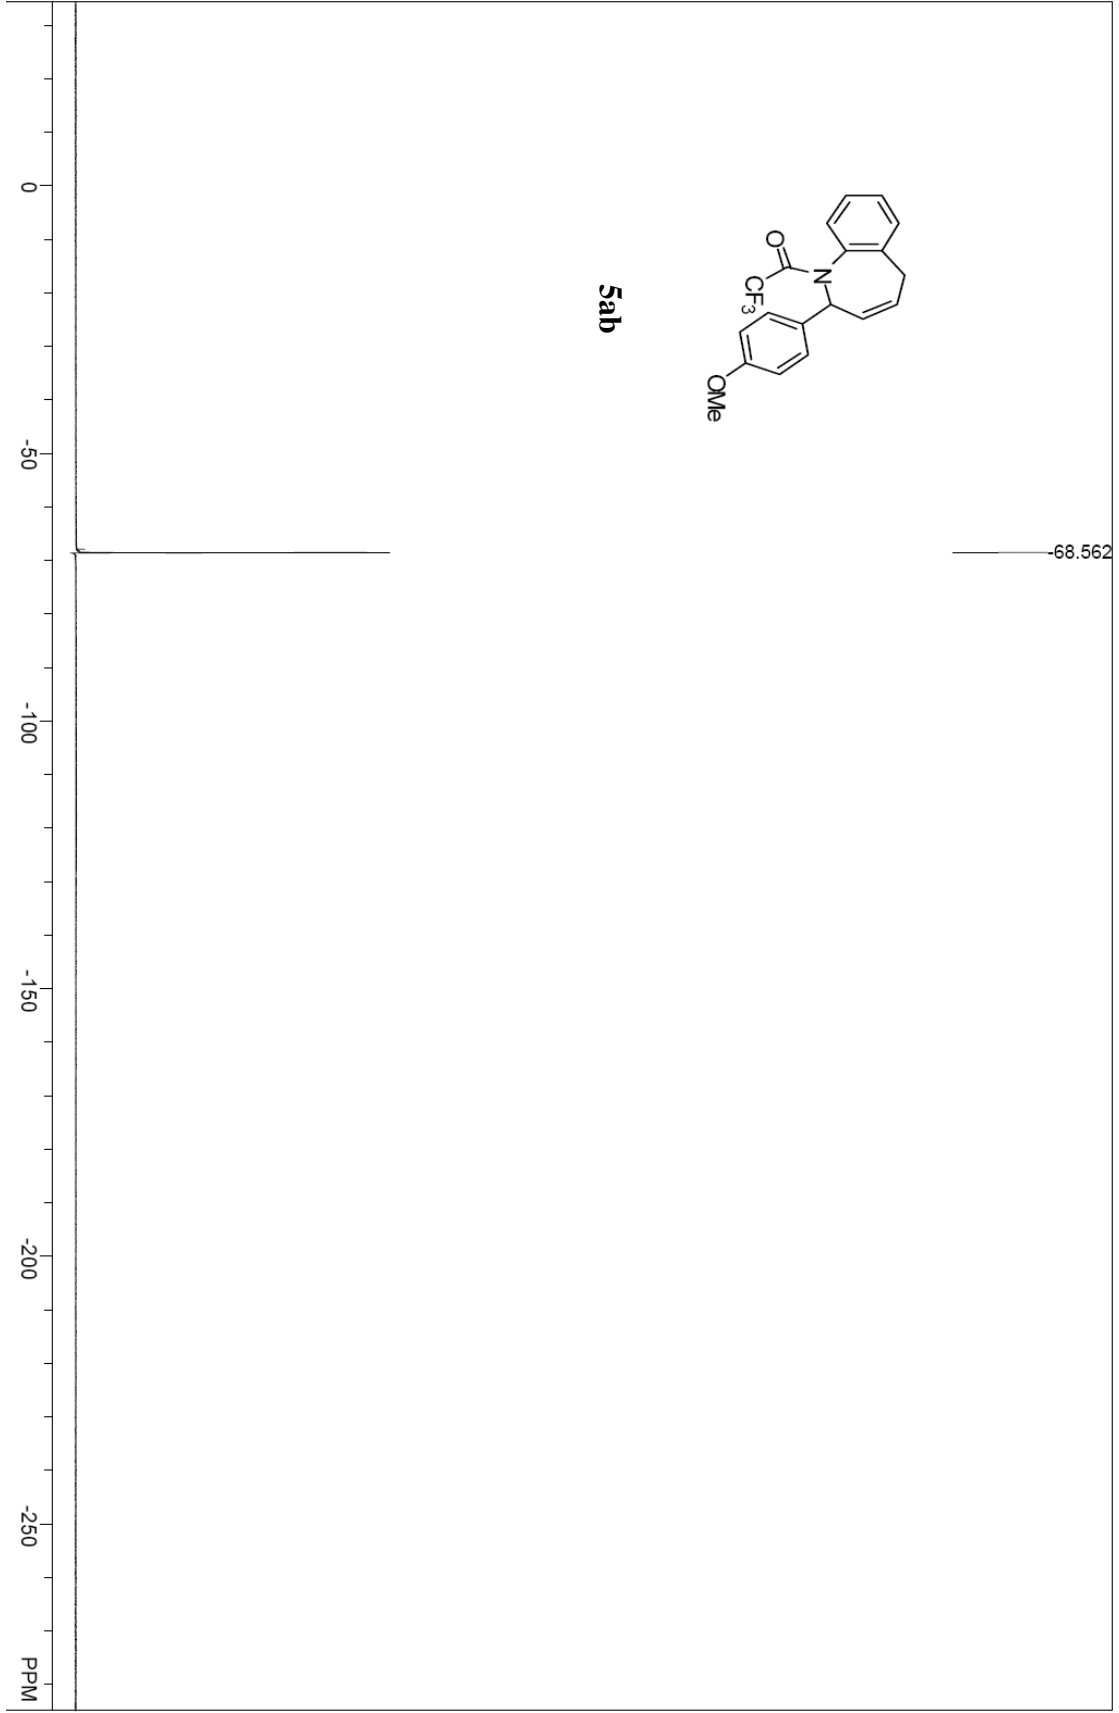

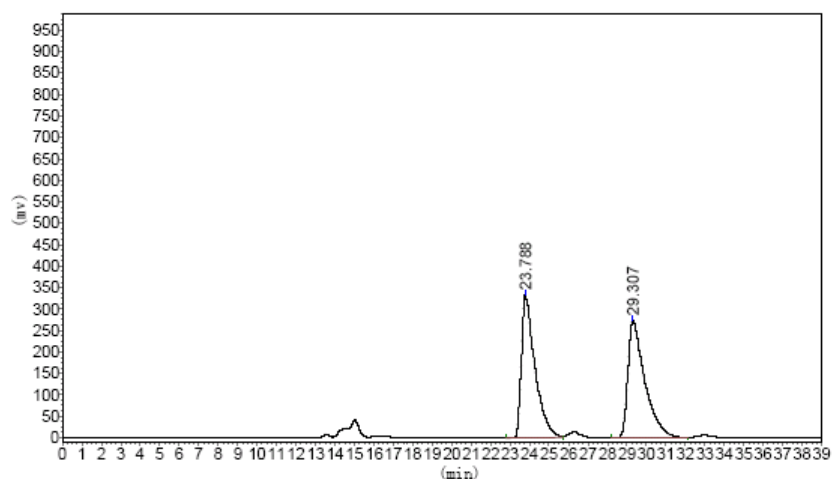

| Peak No.     | R. Time | Peak Height | Peak Area    | Percent  |
|--------------|---------|-------------|--------------|----------|
| 1            | 23.788  | 331863.688  | 16011273.000 | 49.6831  |
| 2            | 29.307  | 272951.500  | 16215536.000 | 50.3169  |
| <b>Total</b> |         | 604815.188  | 32226809.000 | 100.0000 |

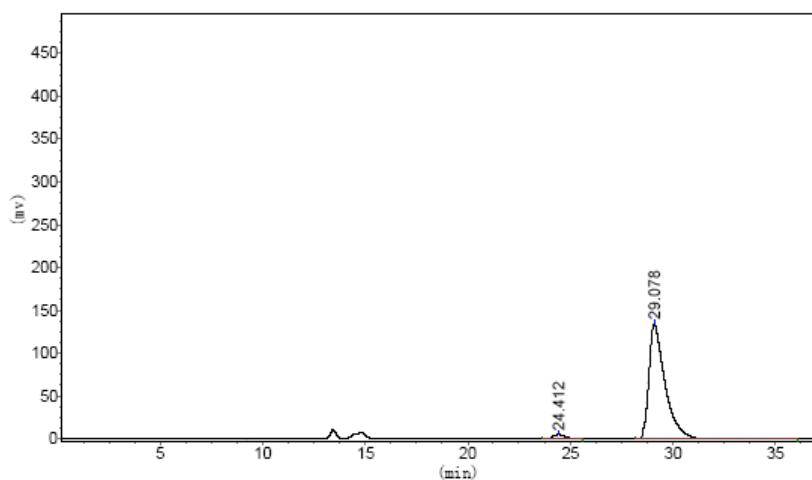

| Peak No.     | R. Time | Peak Height | Peak Area   | Percent  |
|--------------|---------|-------------|-------------|----------|
| 1            | 24.412  | 5295.873    | 210808.516  | 2.8044   |
| 2            | 29.078  | 134167.641  | 7306175.500 | 97.1956  |
| <b>Total</b> |         | 139463.514  | 7516984.016 | 100.0000 |

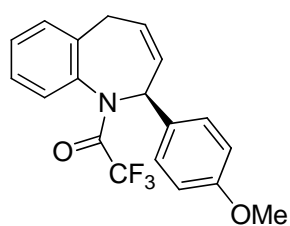

**5ab**

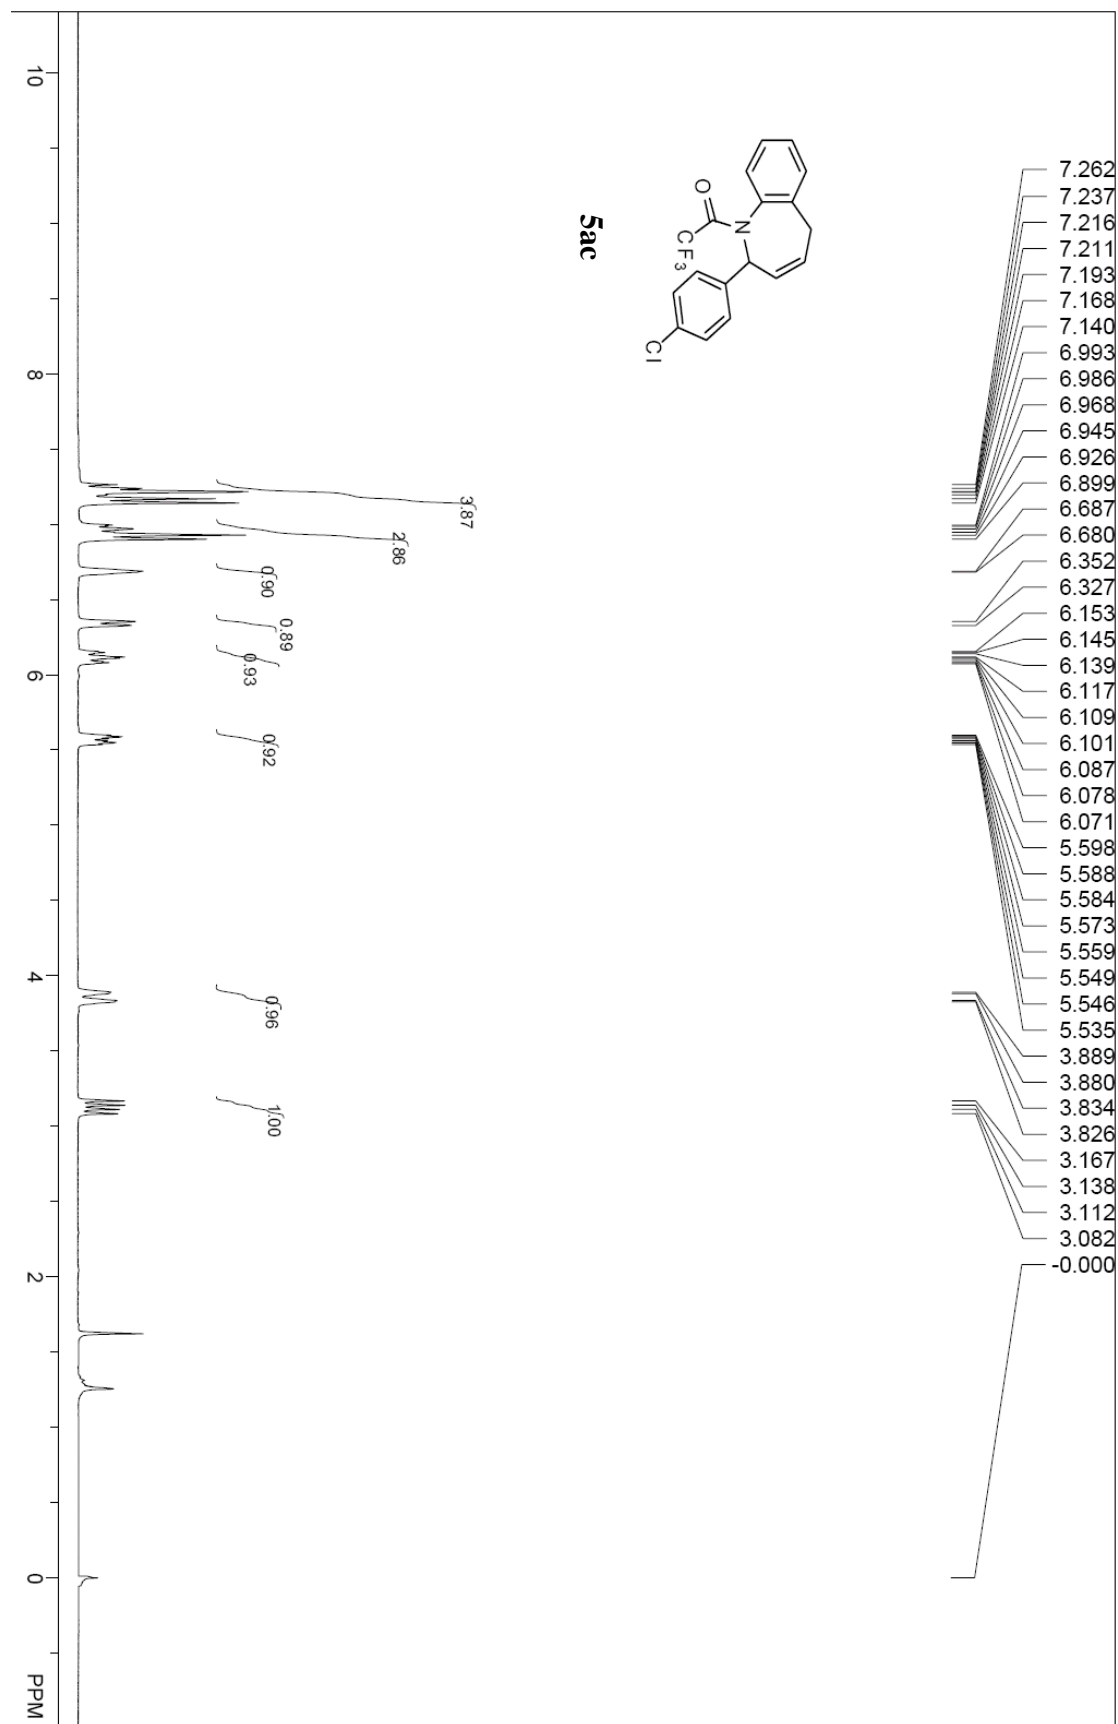

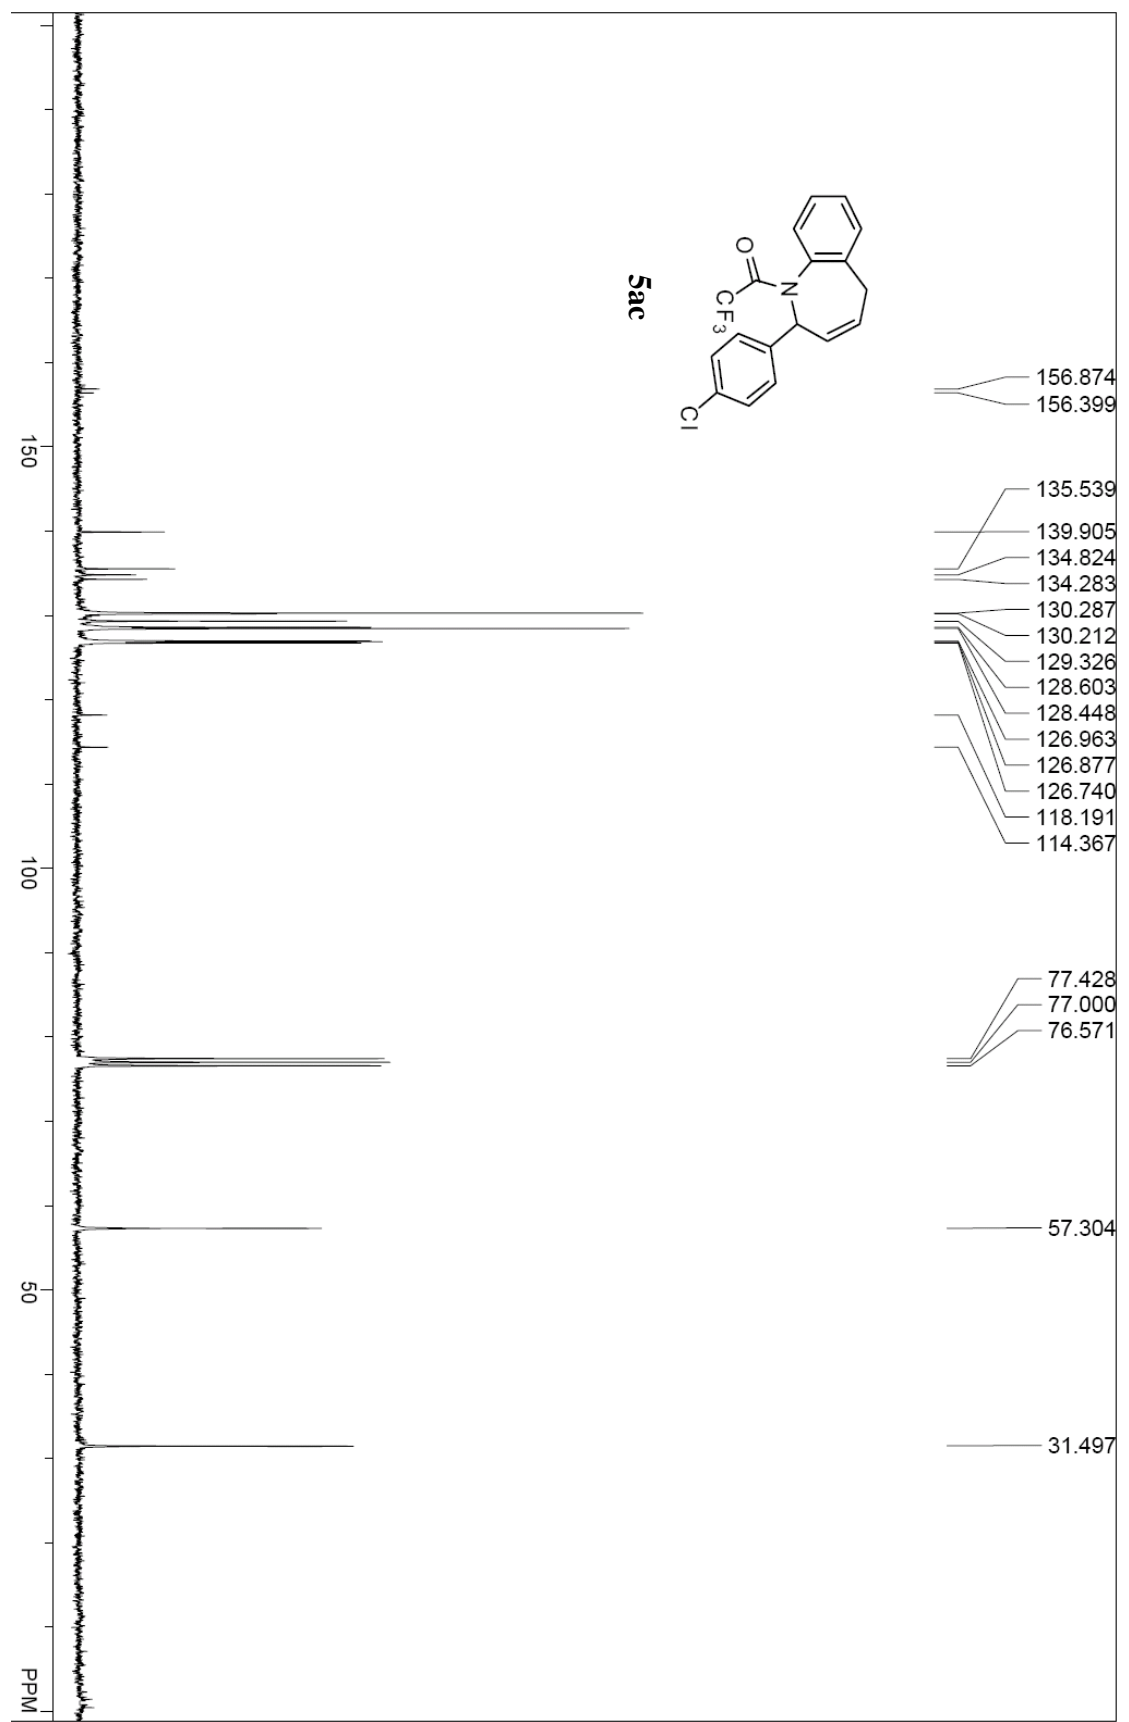



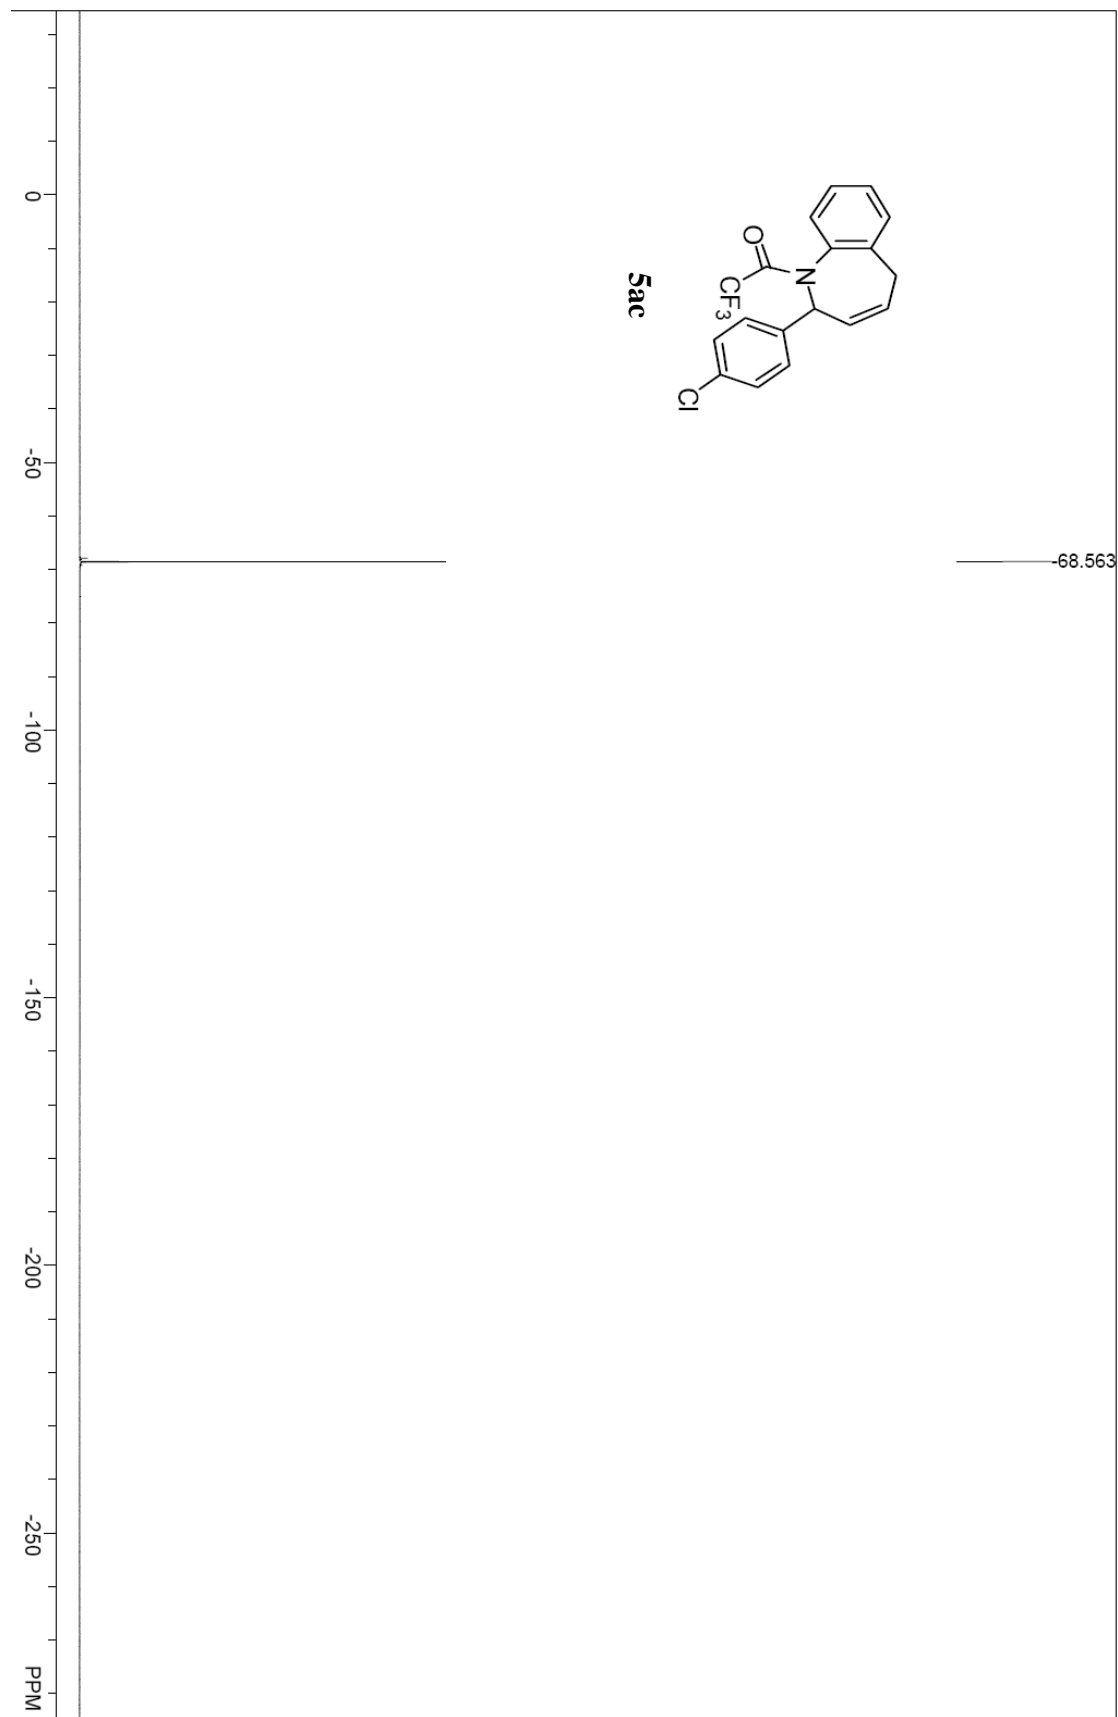

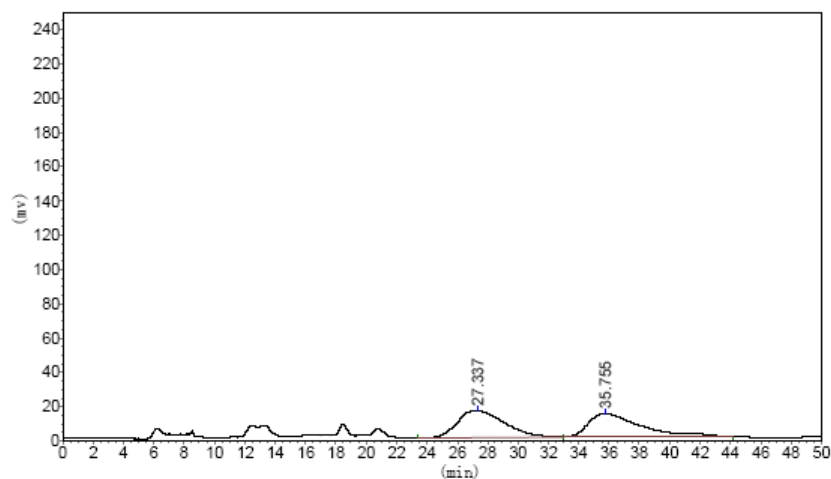

| Peak No. | R. Time | Peak Height | Peak Area   | Percent  |
|----------|---------|-------------|-------------|----------|
| 1        | 27.337  | 15430.995   | 3321529.250 | 50.2740  |
| 2        | 35.755  | 13475.431   | 3285324.250 | 49.7260  |
| Total    |         | 28906.426   | 6606853.500 | 100.0000 |

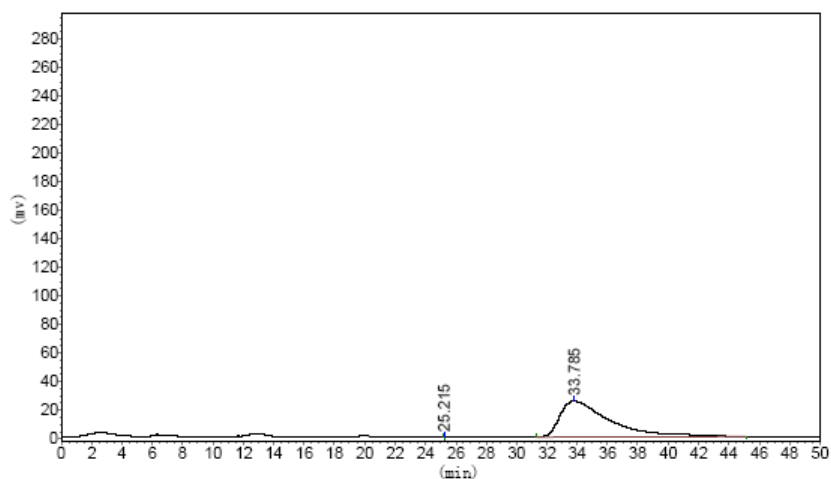

| Peak No. | R. Time | Peak Height | Peak Area   | Percent  |
|----------|---------|-------------|-------------|----------|
| 1        | 25.215  | 3.536       | 5.300       | 0.0001   |
| 2        | 33.785  | 24985.793   | 5648578.000 | 99.9999  |
| Total    |         | 24989.329   | 5648583.300 | 100.0000 |

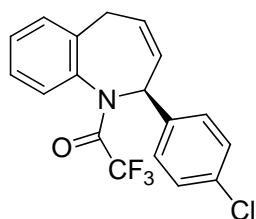

5ac

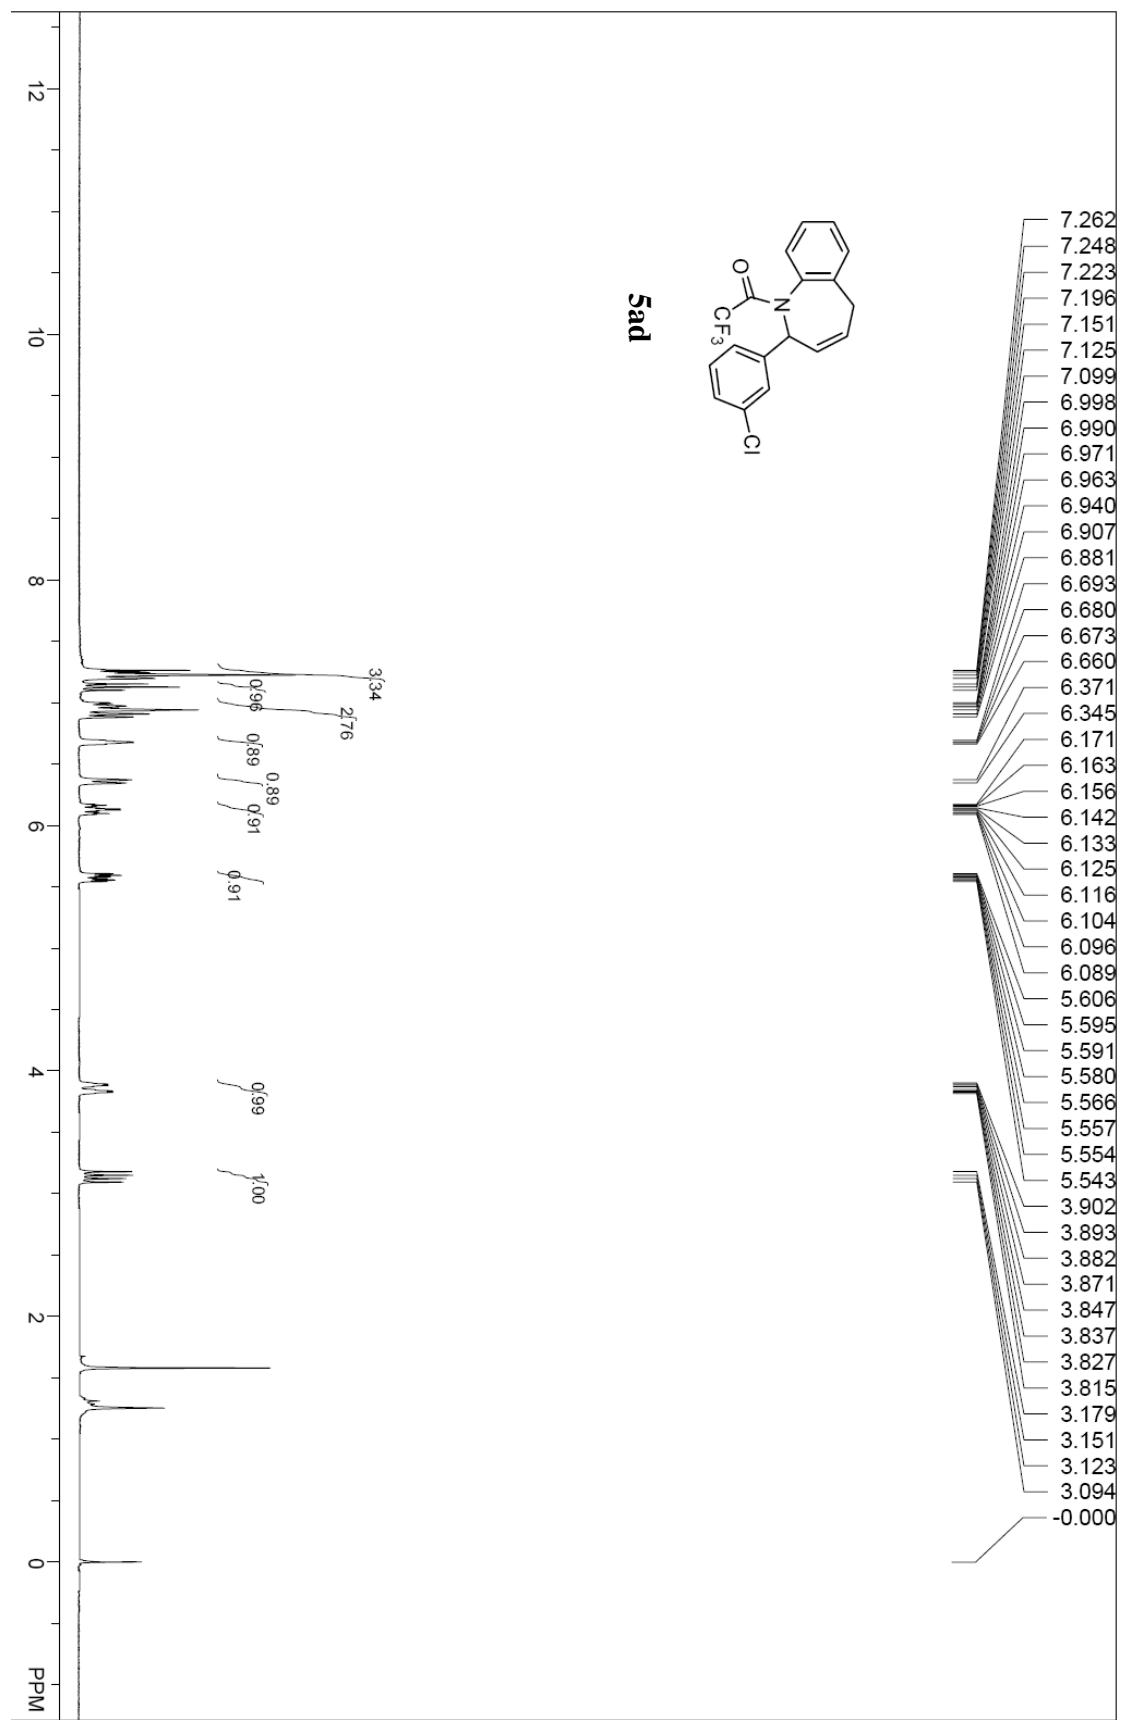

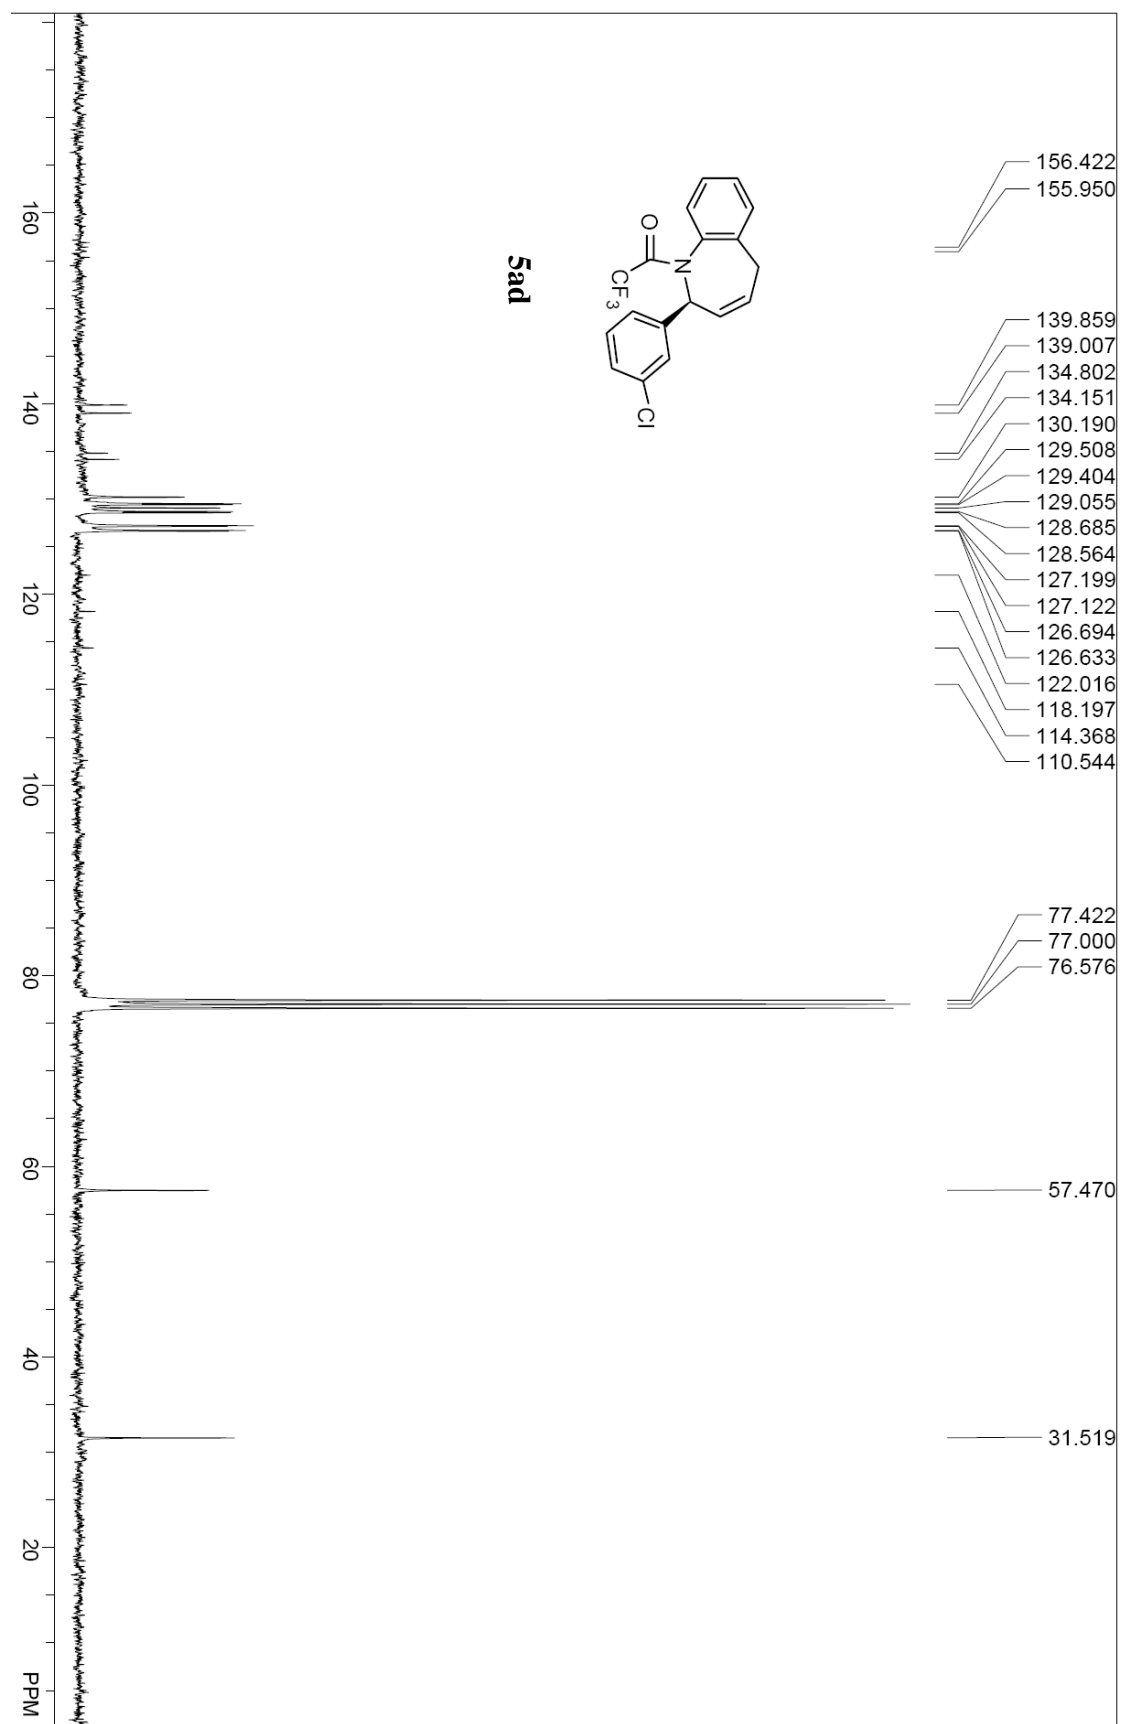

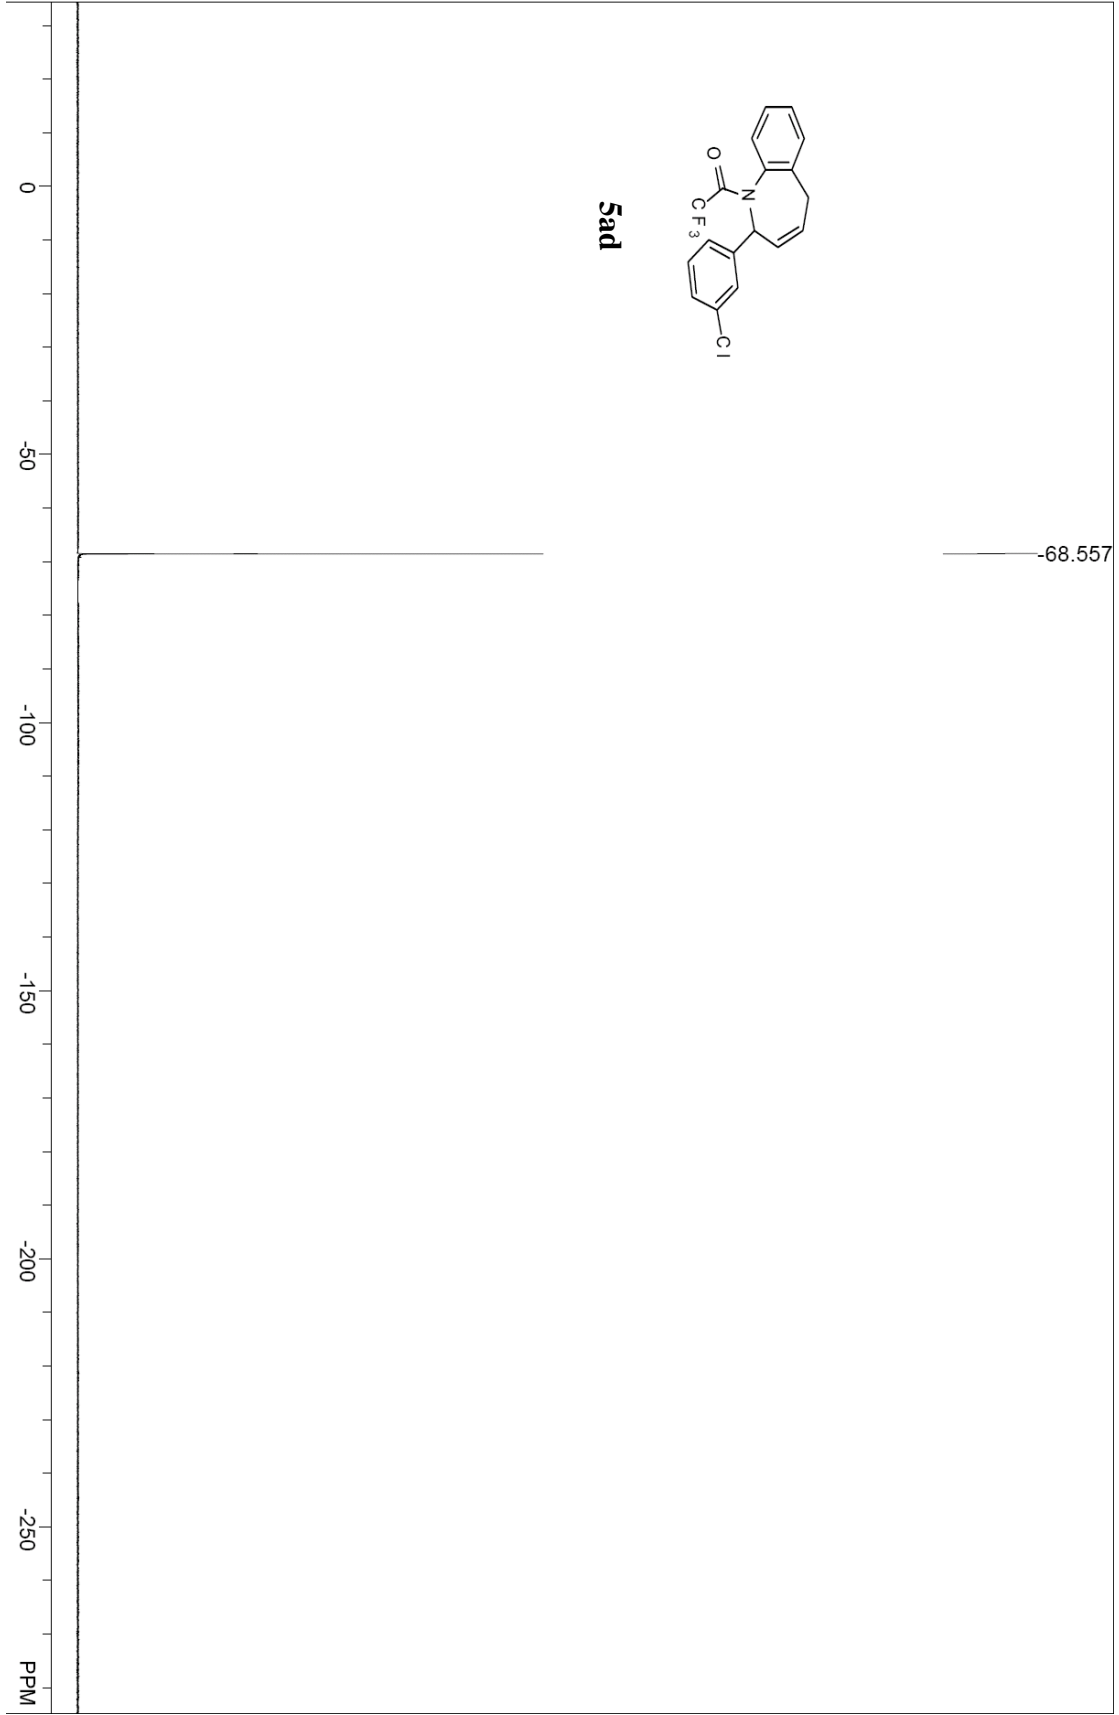

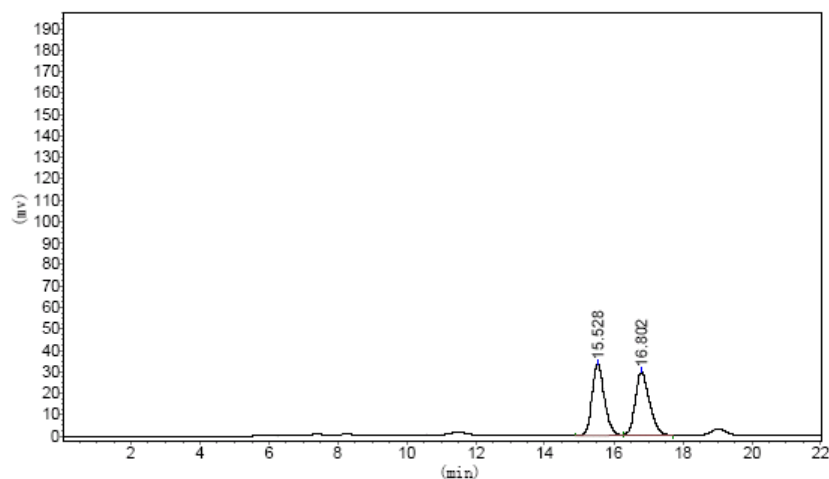

| Peak No.     | R. Time | Peak Height | Peak Area   | Percent  |
|--------------|---------|-------------|-------------|----------|
| 1            | 15.528  | 33271.367   | 830023.563  | 49.7740  |
| 2            | 16.802  | 29326.799   | 837560.313  | 50.2260  |
| <b>Total</b> |         | 62598.166   | 1667583.875 | 100.0000 |

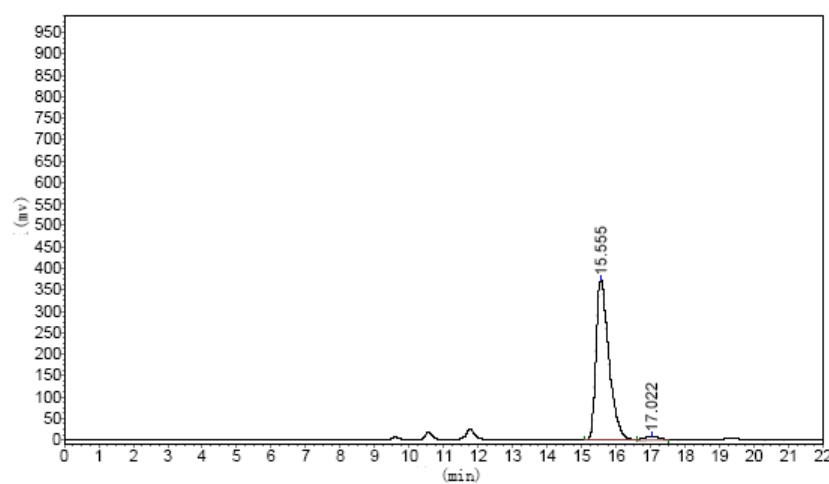

| Peak No.     | R. Time | Peak Height | Peak Area   | Percent  |
|--------------|---------|-------------|-------------|----------|
| 1            | 15.555  | 373401.938  | 9730737.000 | 97.5010  |
| 2            | 17.022  | 8559.526    | 249401.438  | 2.4990   |
| <b>Total</b> |         | 381961.464  | 9980138.438 | 100.0000 |

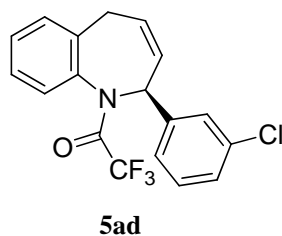

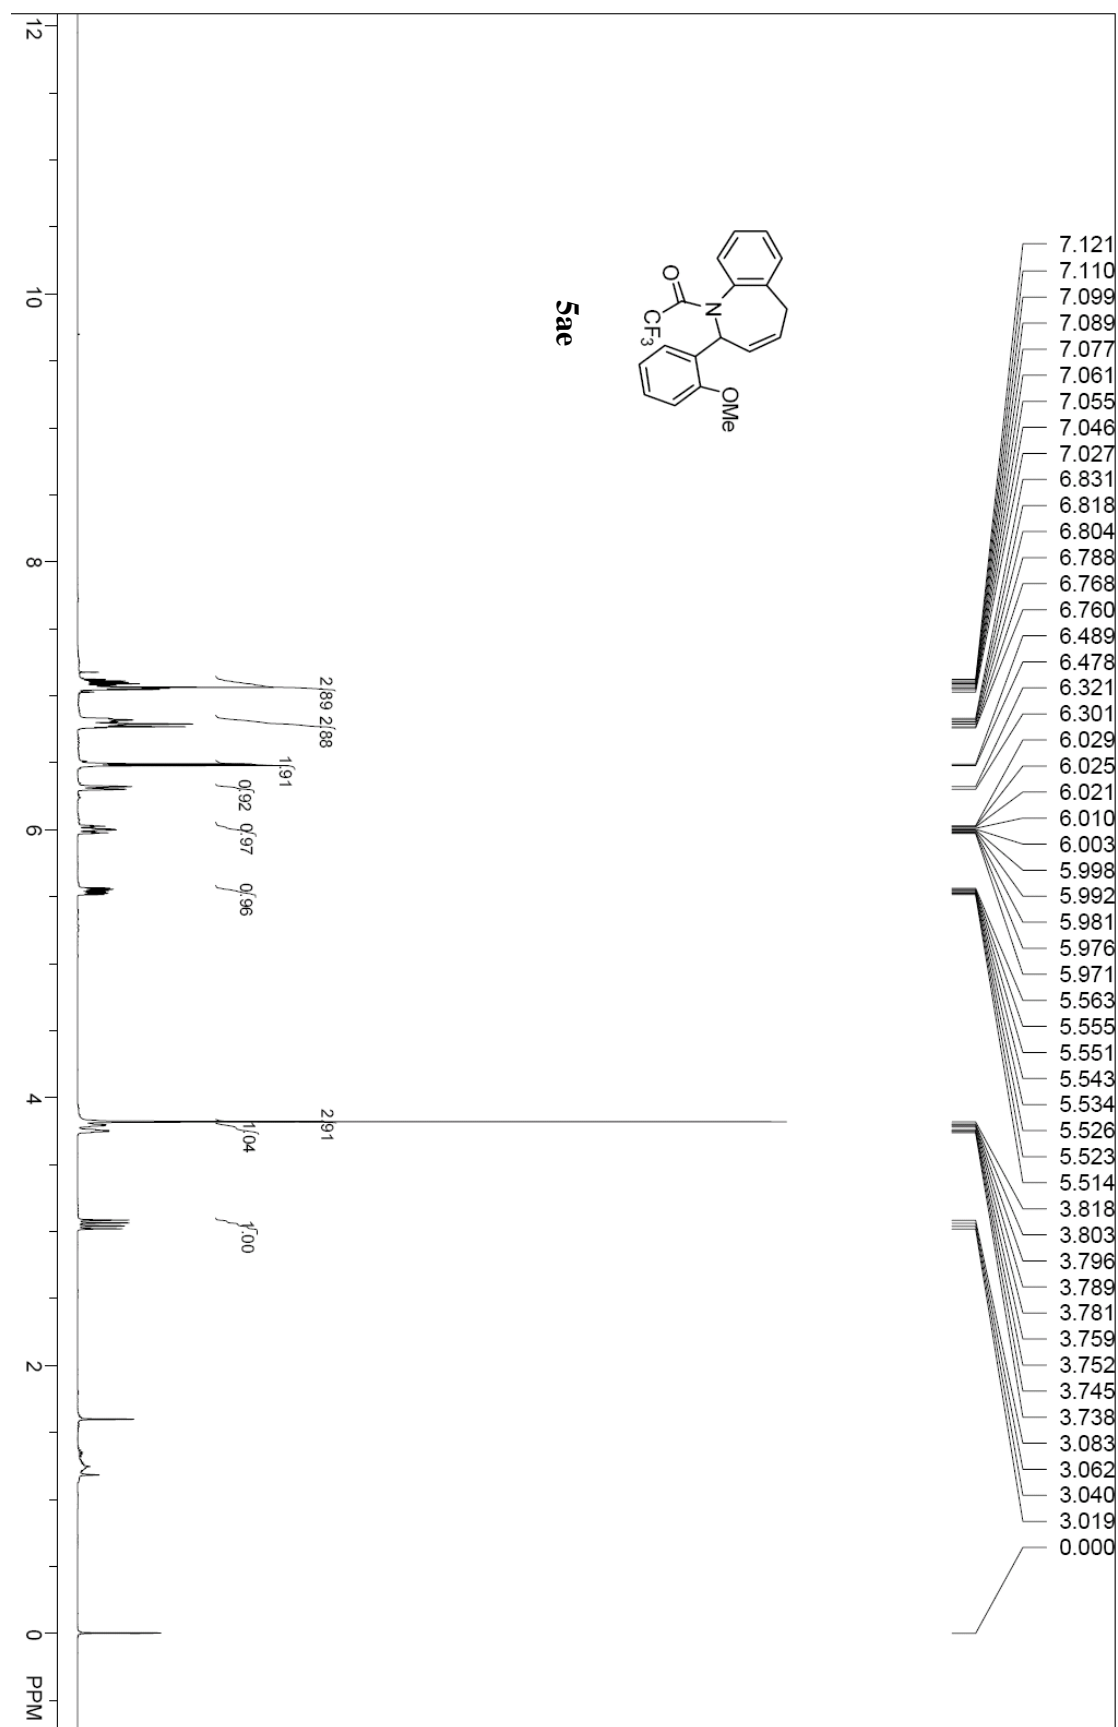

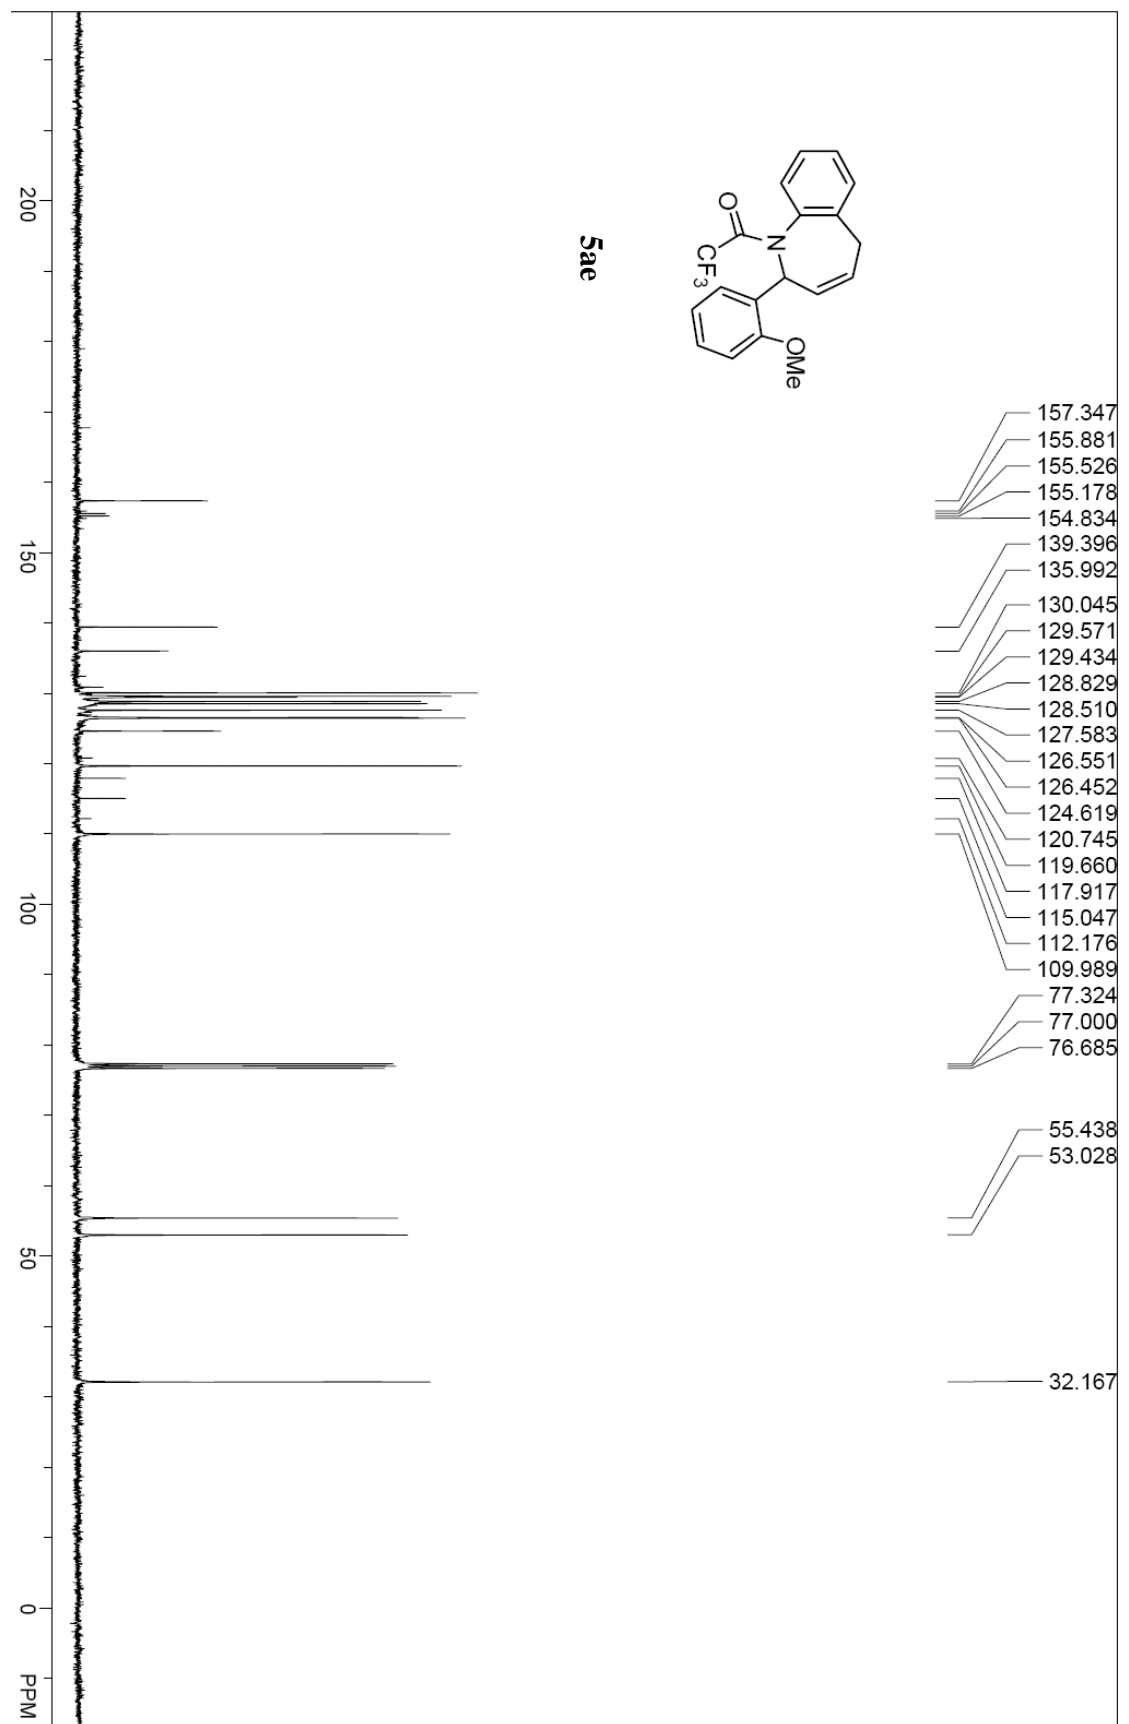



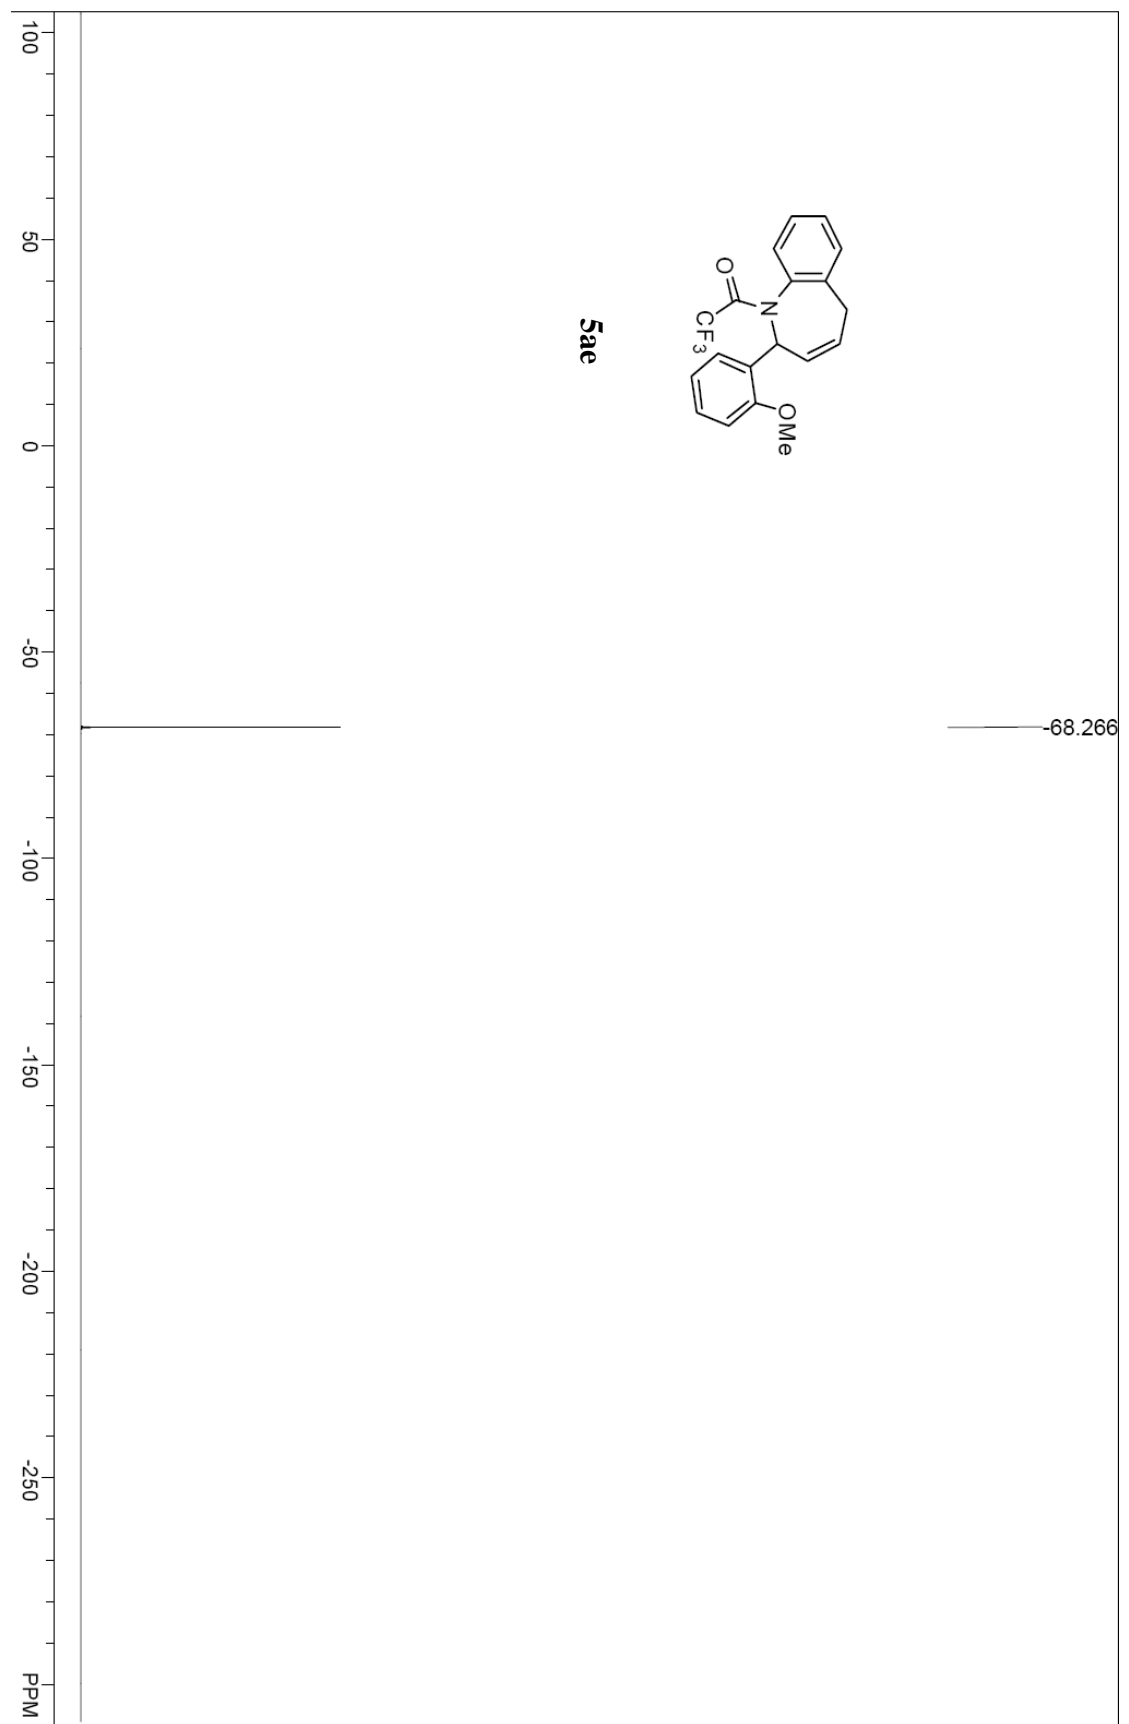

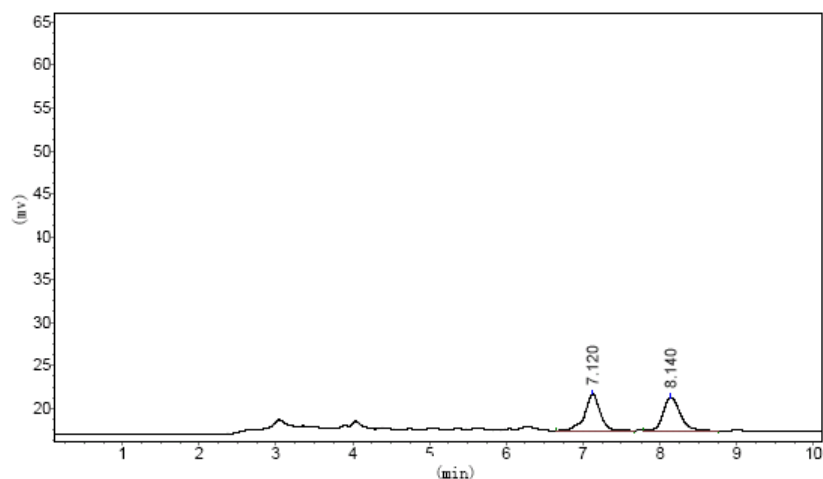

| Peak No.     | R. Time | Peak Height | Peak Area  | Percent  |
|--------------|---------|-------------|------------|----------|
| 1            | 7.120   | 4243.009    | 58932.770  | 49.5709  |
| 2            | 8.140   | 3871.097    | 59953.141  | 50.4291  |
| <b>Total</b> |         | 8114.107    | 118885.910 | 100.0000 |

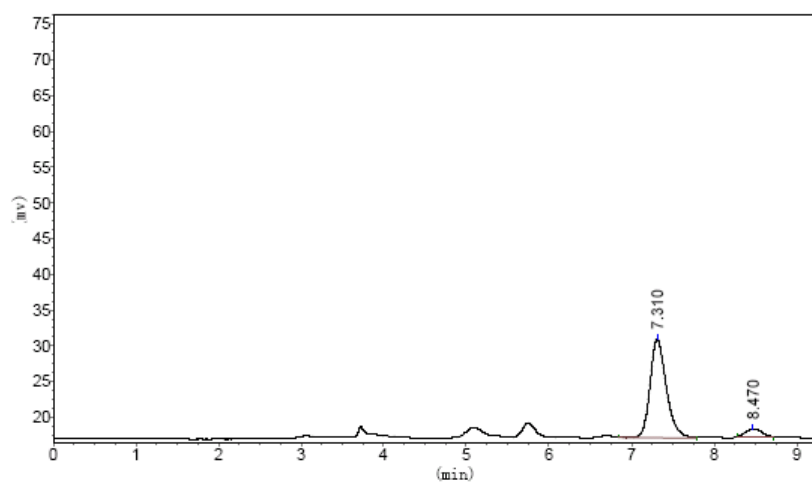

| Peak No.     | R. Time | Peak Height | Peak Area  | Percent  |
|--------------|---------|-------------|------------|----------|
| 1            | 7.310   | 13829.887   | 187826.266 | 92.3047  |
| 2            | 8.470   | 1130.246    | 15658.754  | 7.6953   |
| <b>Total</b> |         | 14960.132   | 203485.020 | 100.0000 |

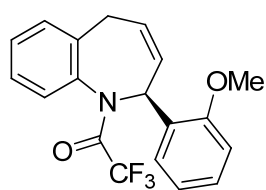

**5ae**

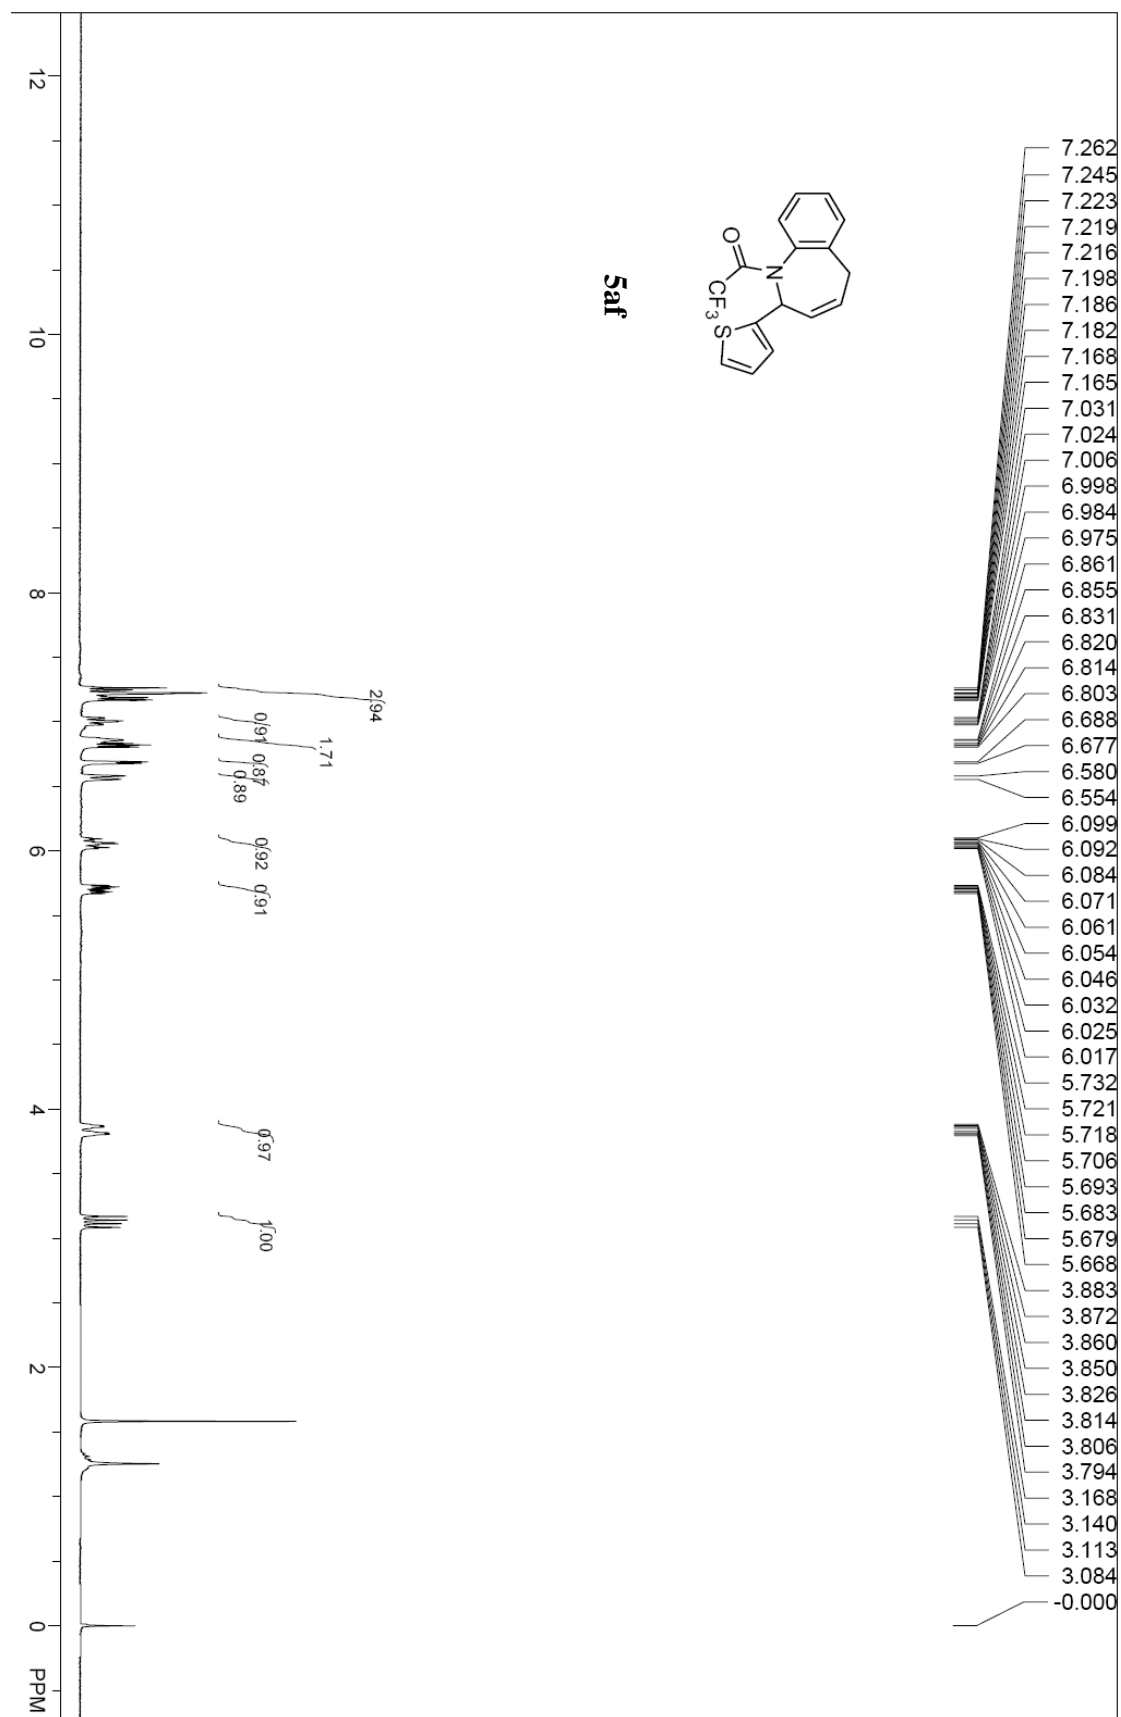

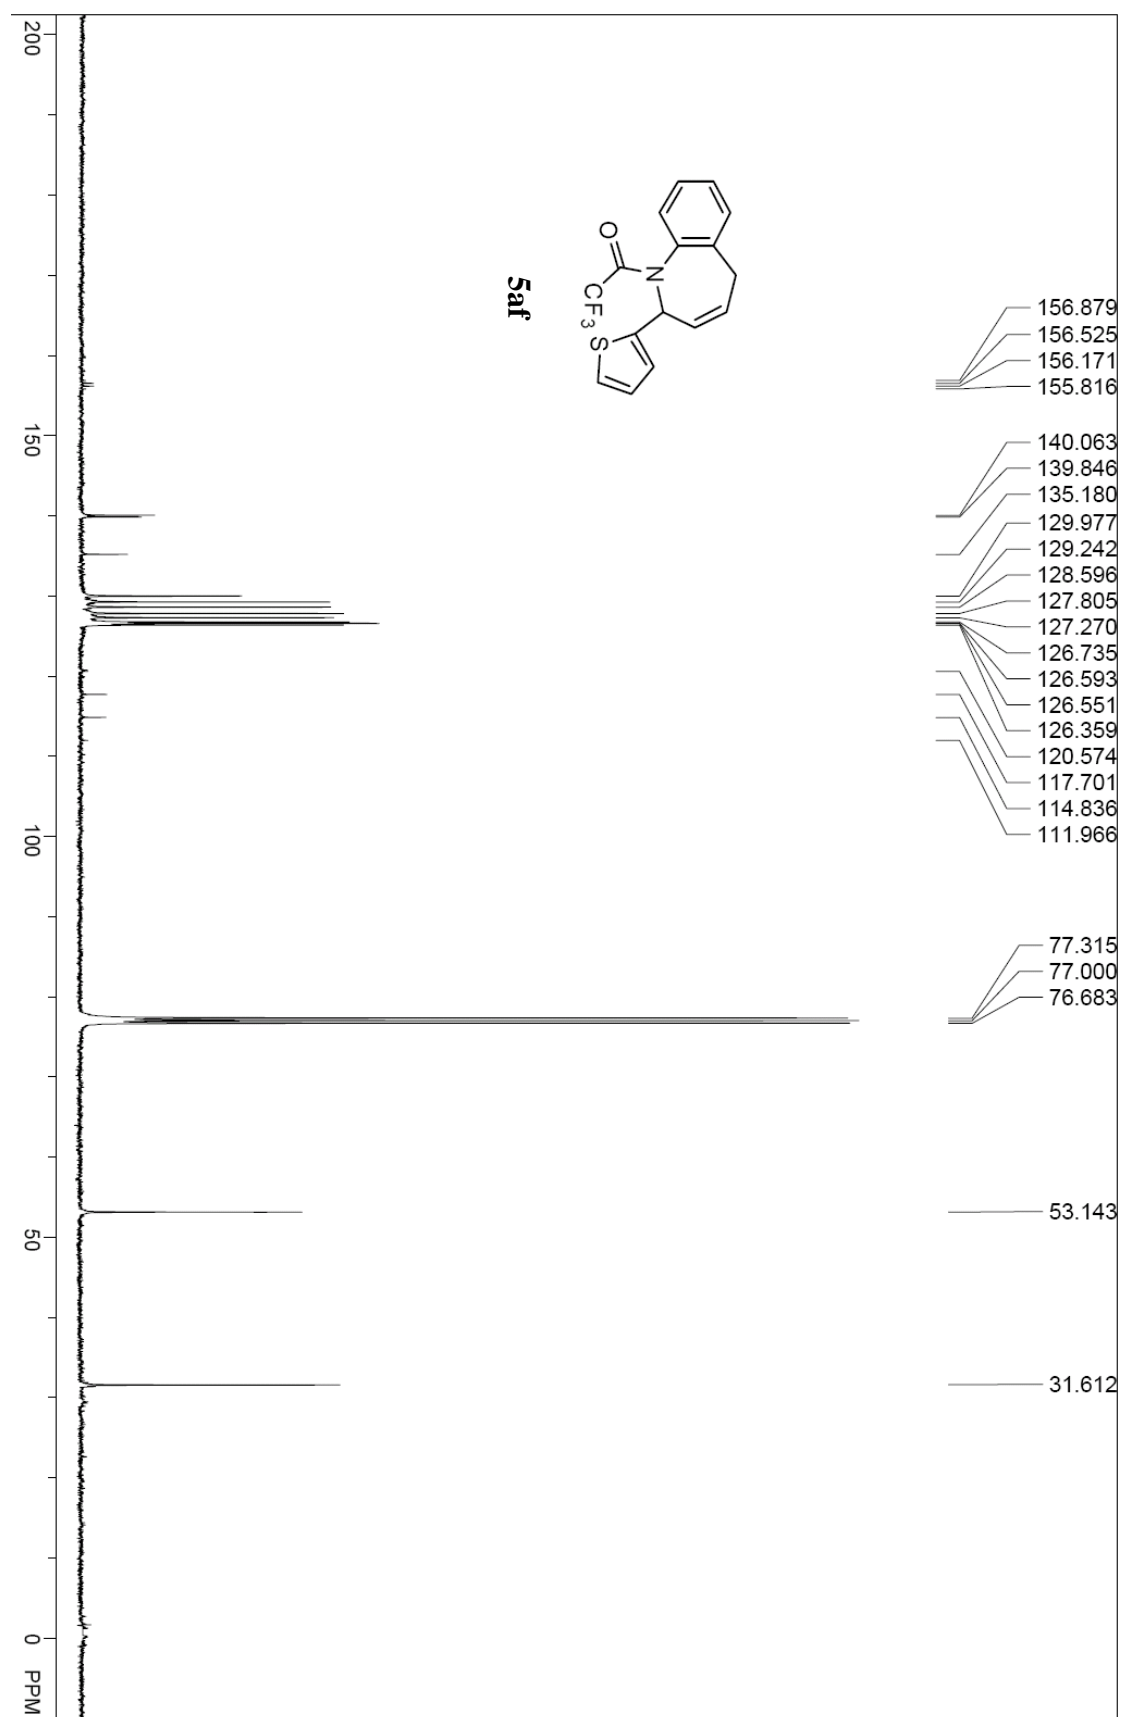

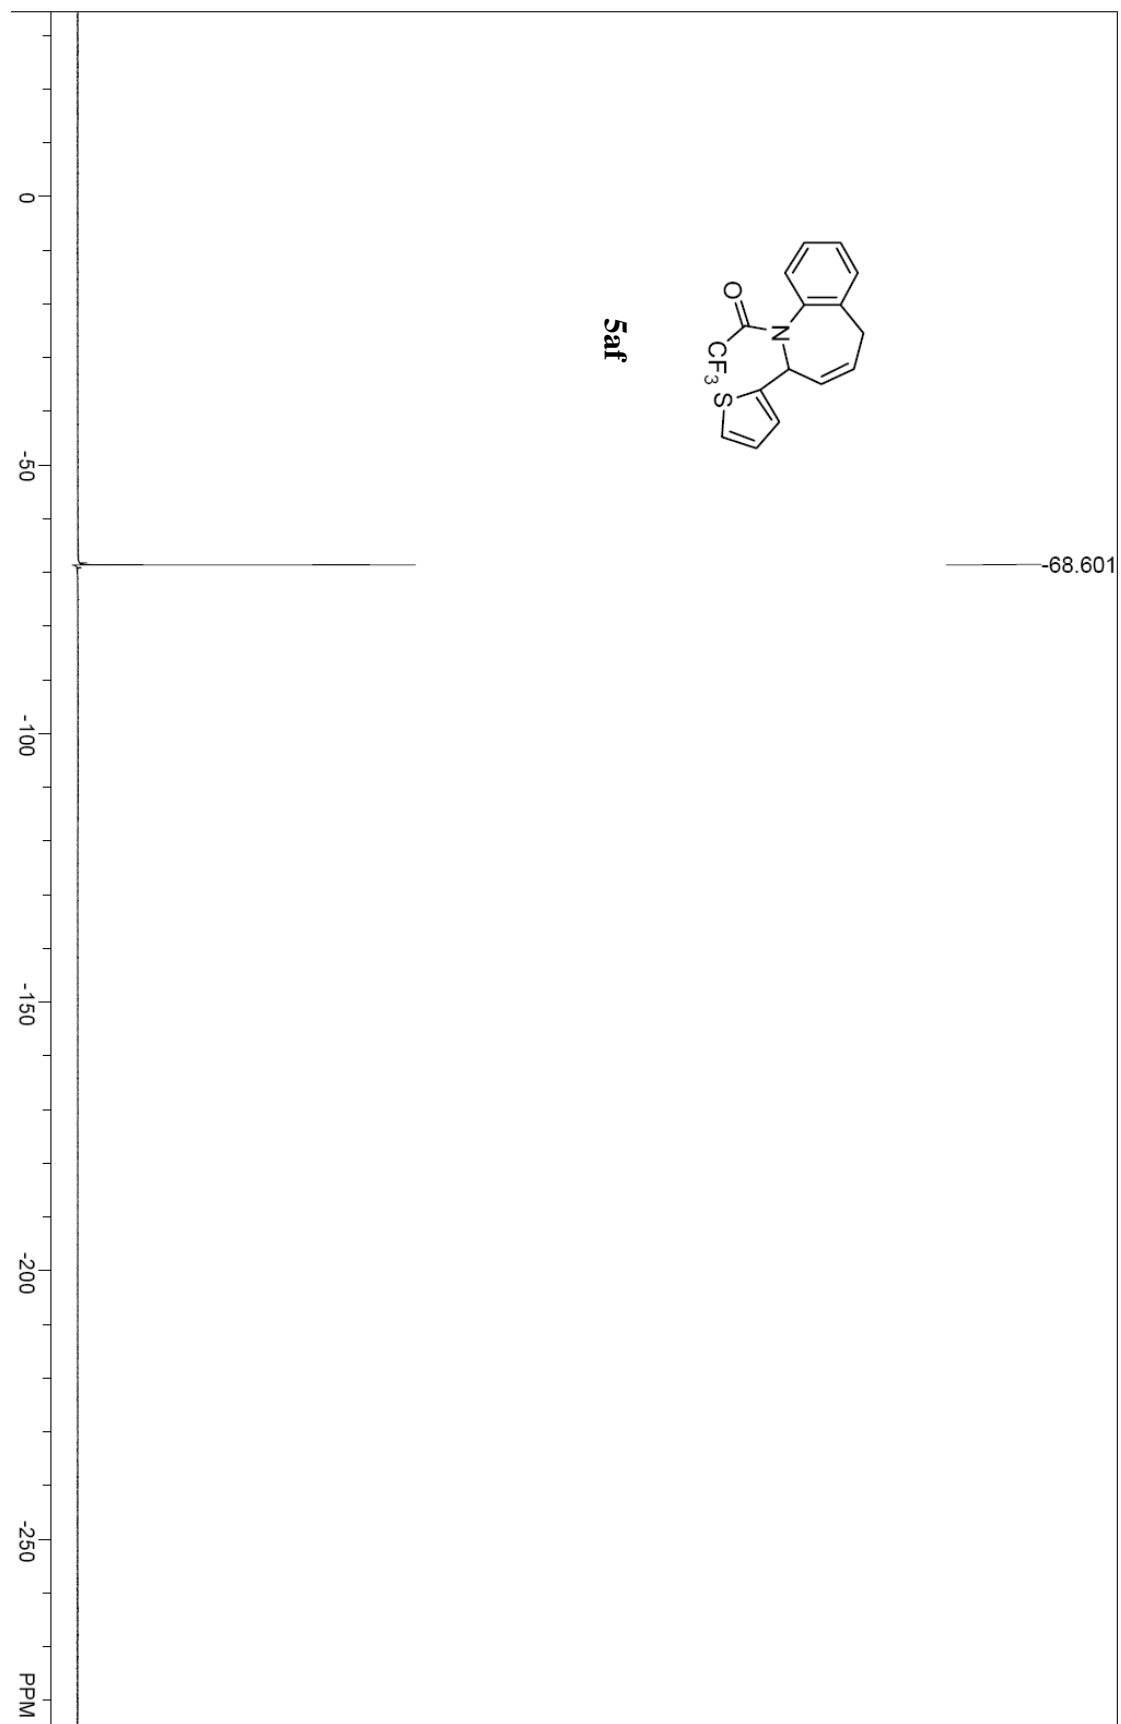

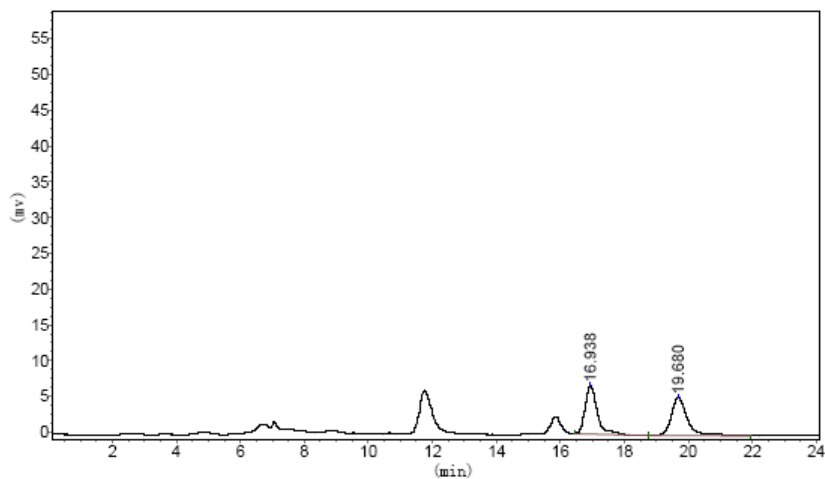

| Peak No. | R. Time | Peak Height | Peak Area  | Percent  |
|----------|---------|-------------|------------|----------|
| 1        | 16.938  | 6731.577    | 180746.656 | 49.5487  |
| 2        | 19.680  | 5231.145    | 184039.000 | 50.4513  |
| Total    |         | 11962.722   | 364785.656 | 100.0000 |

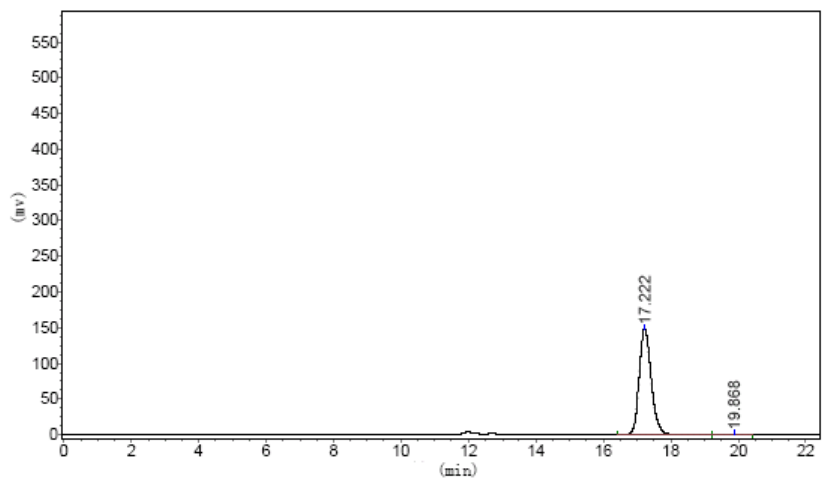

| Peak No. | R. Time | Peak Height | Peak Area   | Percent  |
|----------|---------|-------------|-------------|----------|
| 1        | 17.222  | 148243.609  | 3678706.500 | 99.0384  |
| 2        | 19.868  | 1080.624    | 35716.863   | 0.9616   |
| Total    |         | 149324.233  | 3714423.363 | 100.0000 |

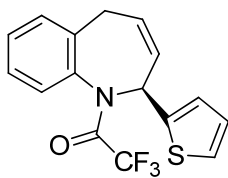

5af

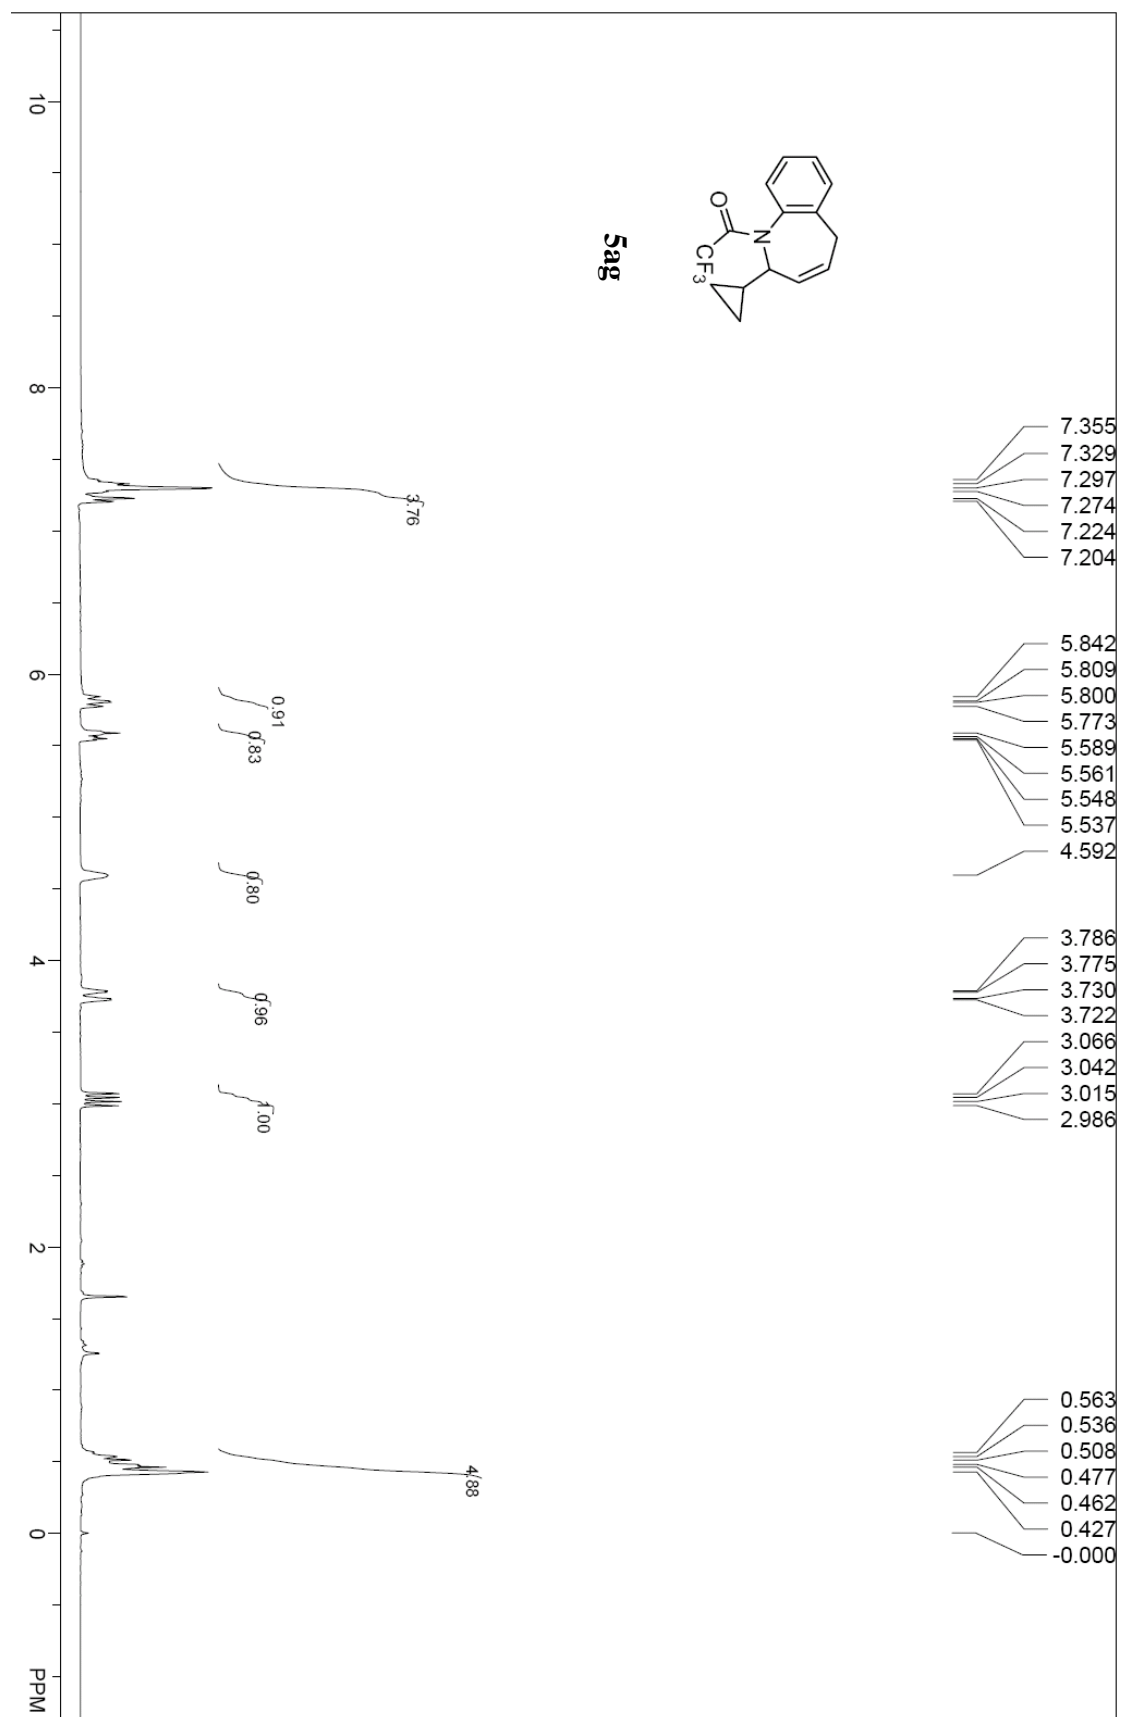

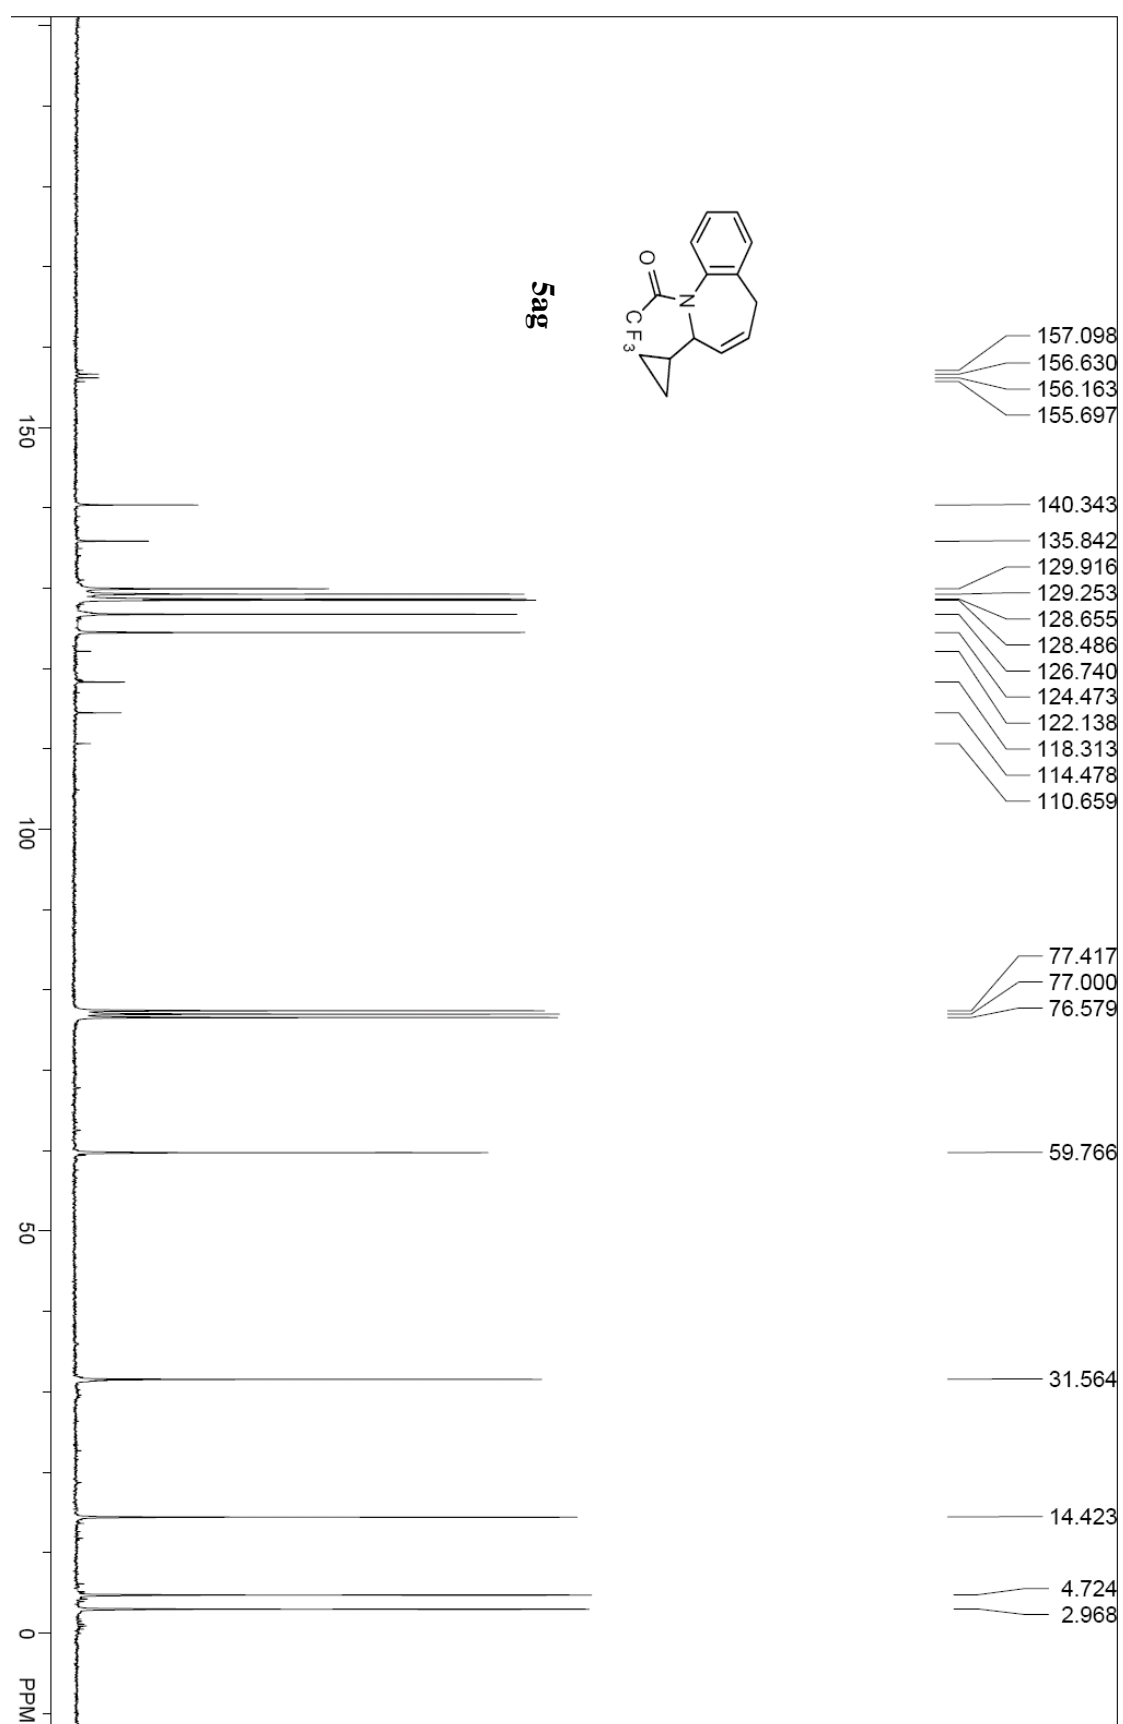



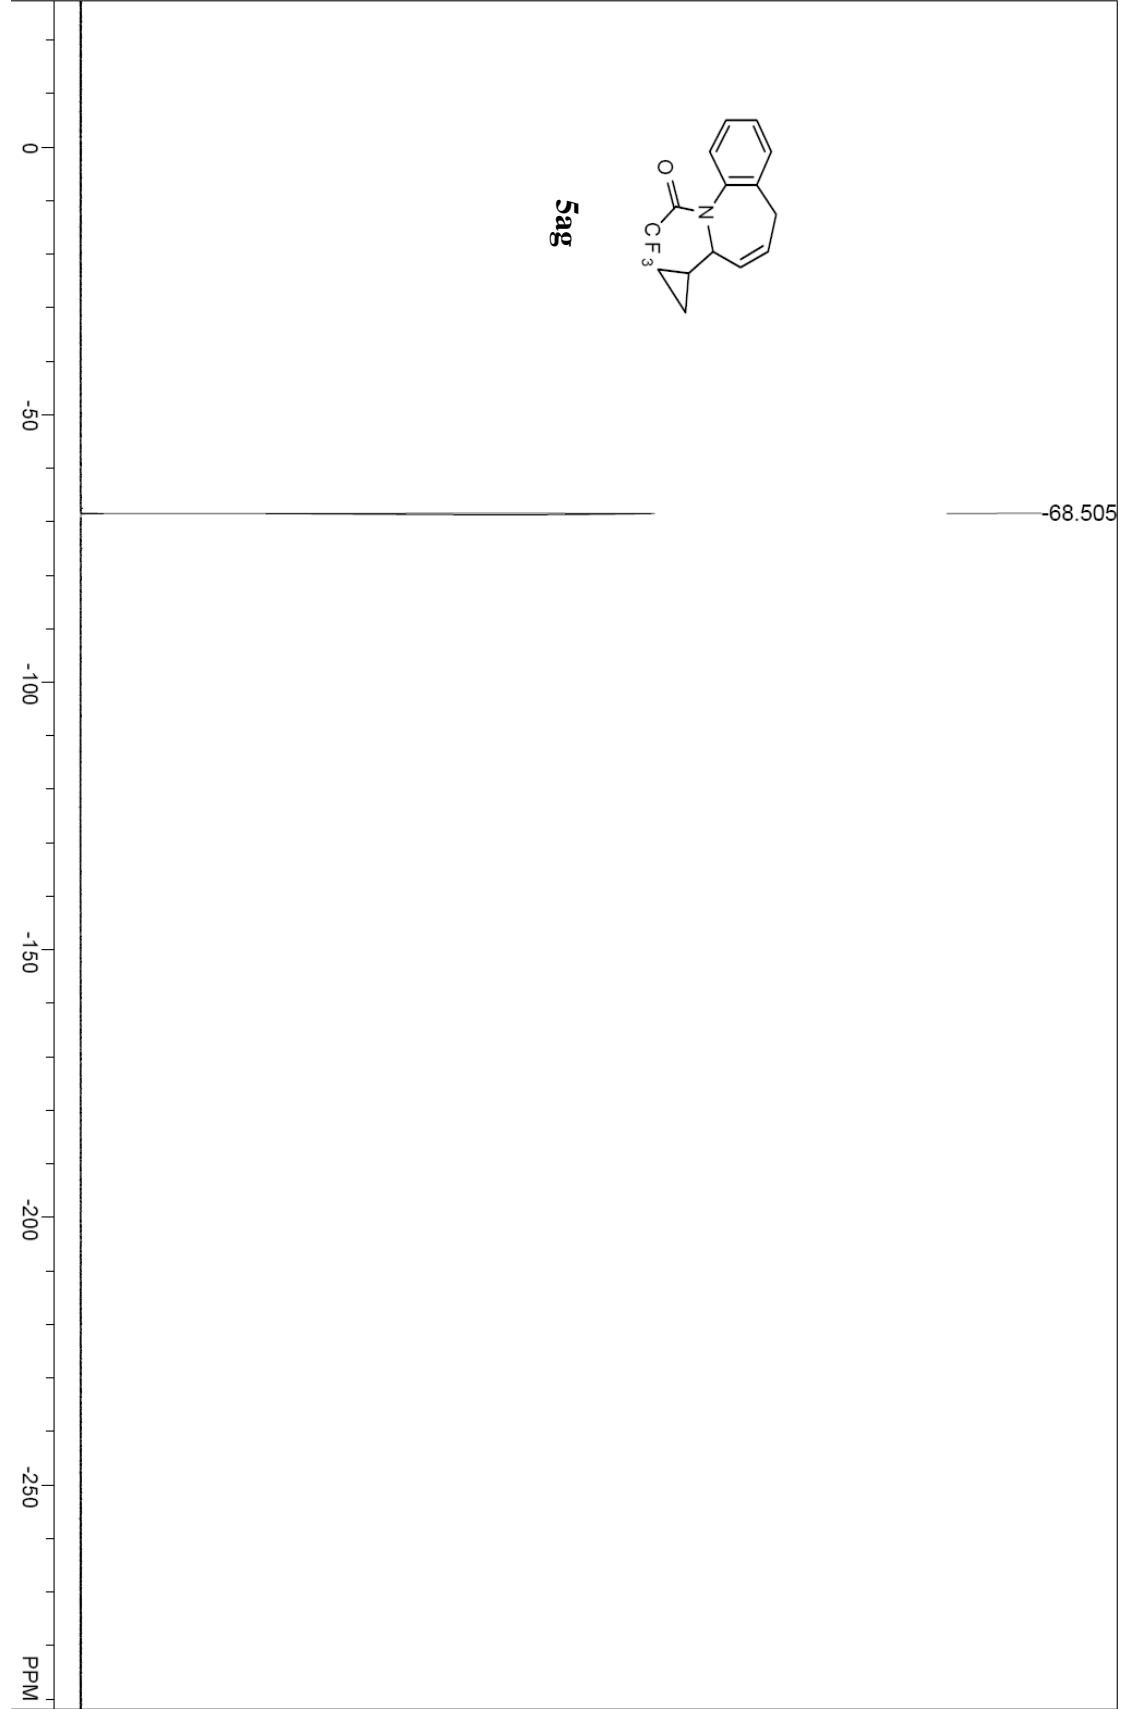

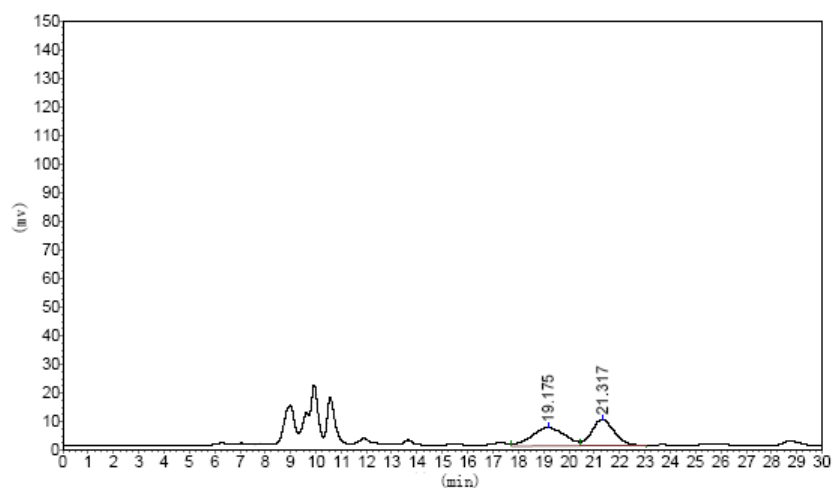

| Peak No.     | R. Time | Peak Height | Peak Area   | Percent  |
|--------------|---------|-------------|-------------|----------|
| 1            | 19.175  | 6374.385    | 571938.438  | 49.9952  |
| 2            | 21.317  | 9244.735    | 572047.375  | 50.0048  |
| <b>Total</b> |         | 15619.120   | 1143985.813 | 100.0000 |

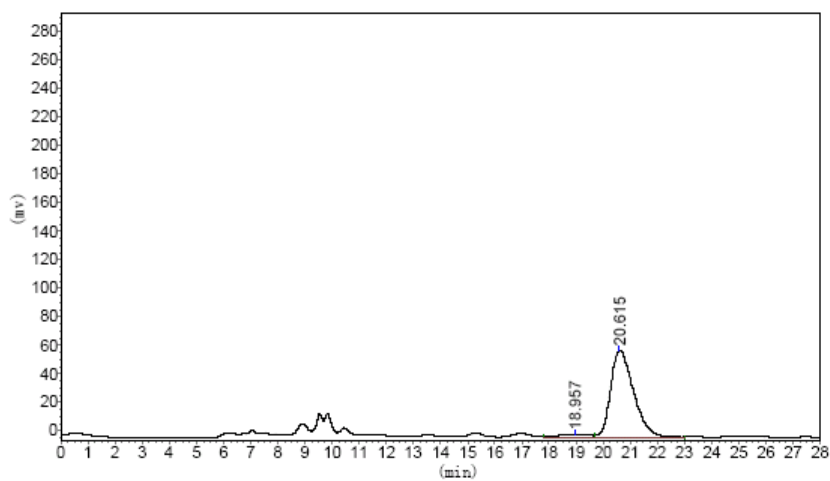

| Peak No.     | R. Time | Peak Height | Peak Area   | Percent  |
|--------------|---------|-------------|-------------|----------|
| 1            | 18.957  | 2103.497    | 150087.969  | 4.0359   |
| 2            | 20.615  | 60875.430   | 3568704.250 | 95.9641  |
| <b>Total</b> |         | 62978.926   | 3718792.219 | 100.0000 |

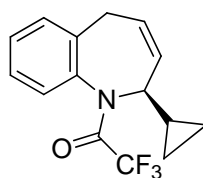

**5ag**

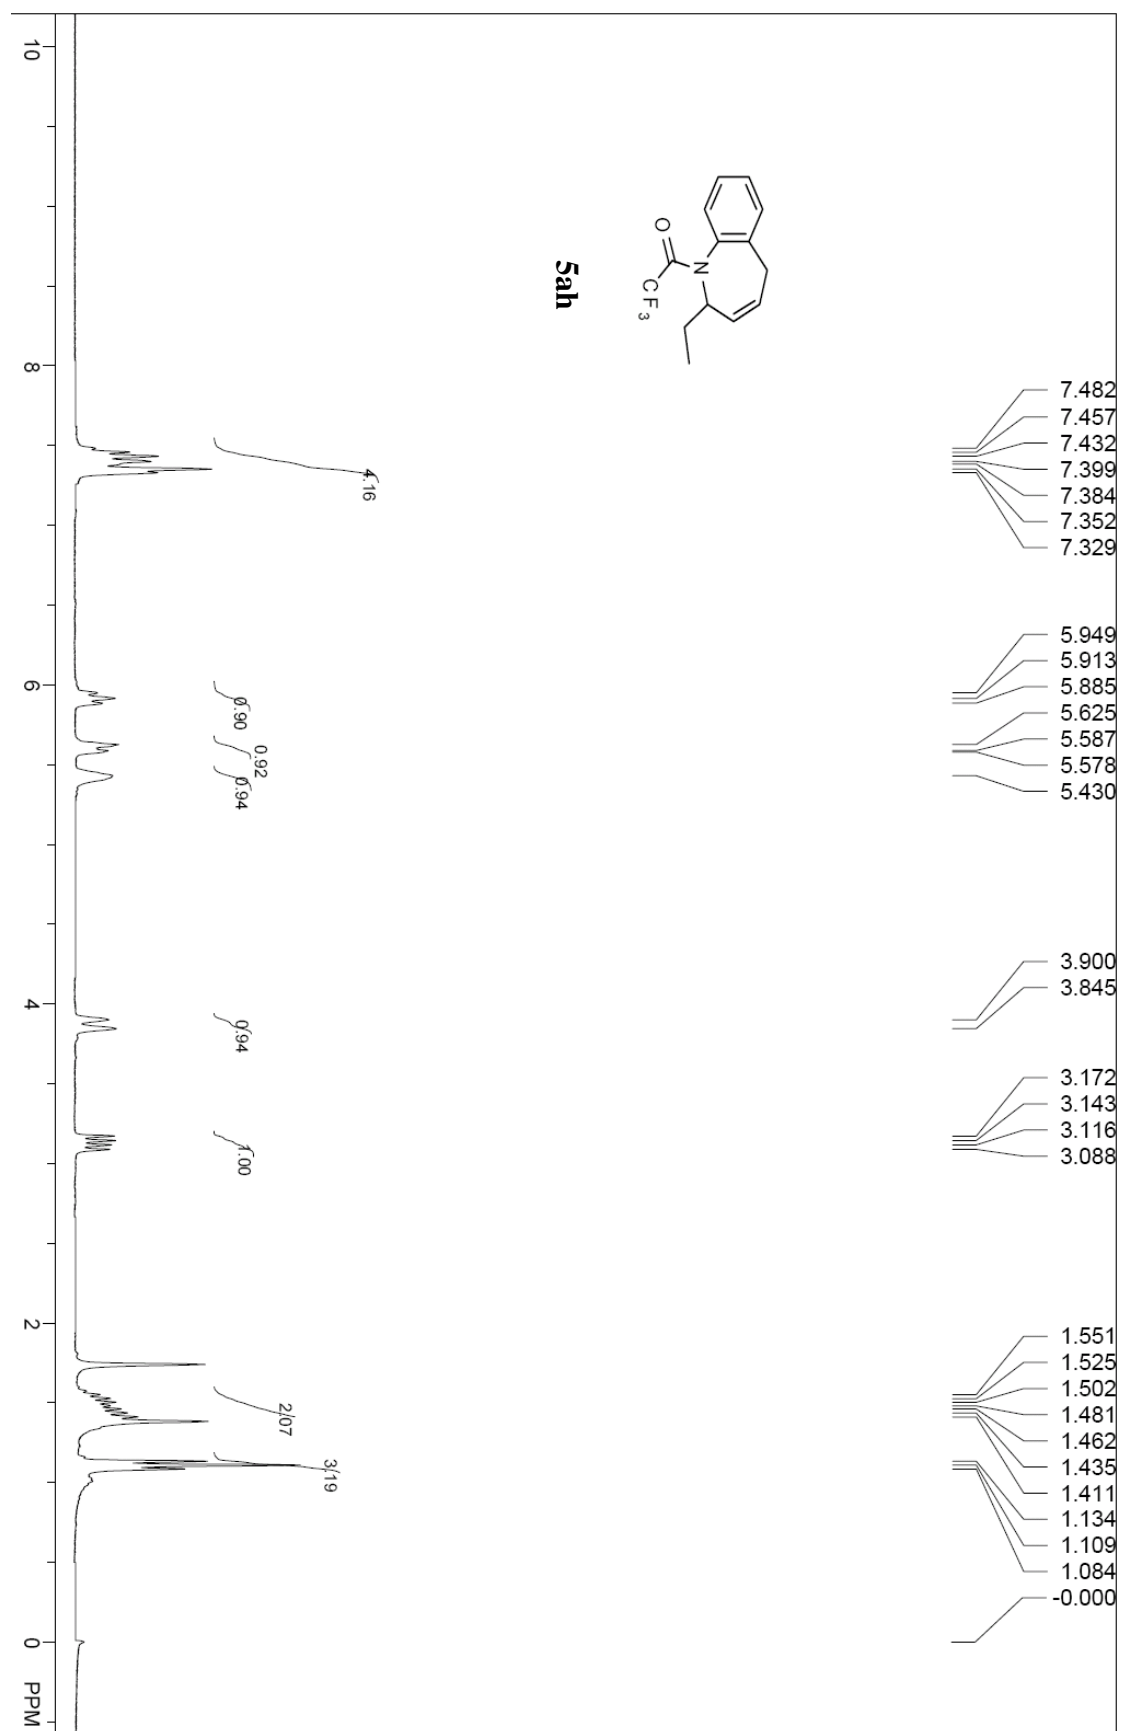

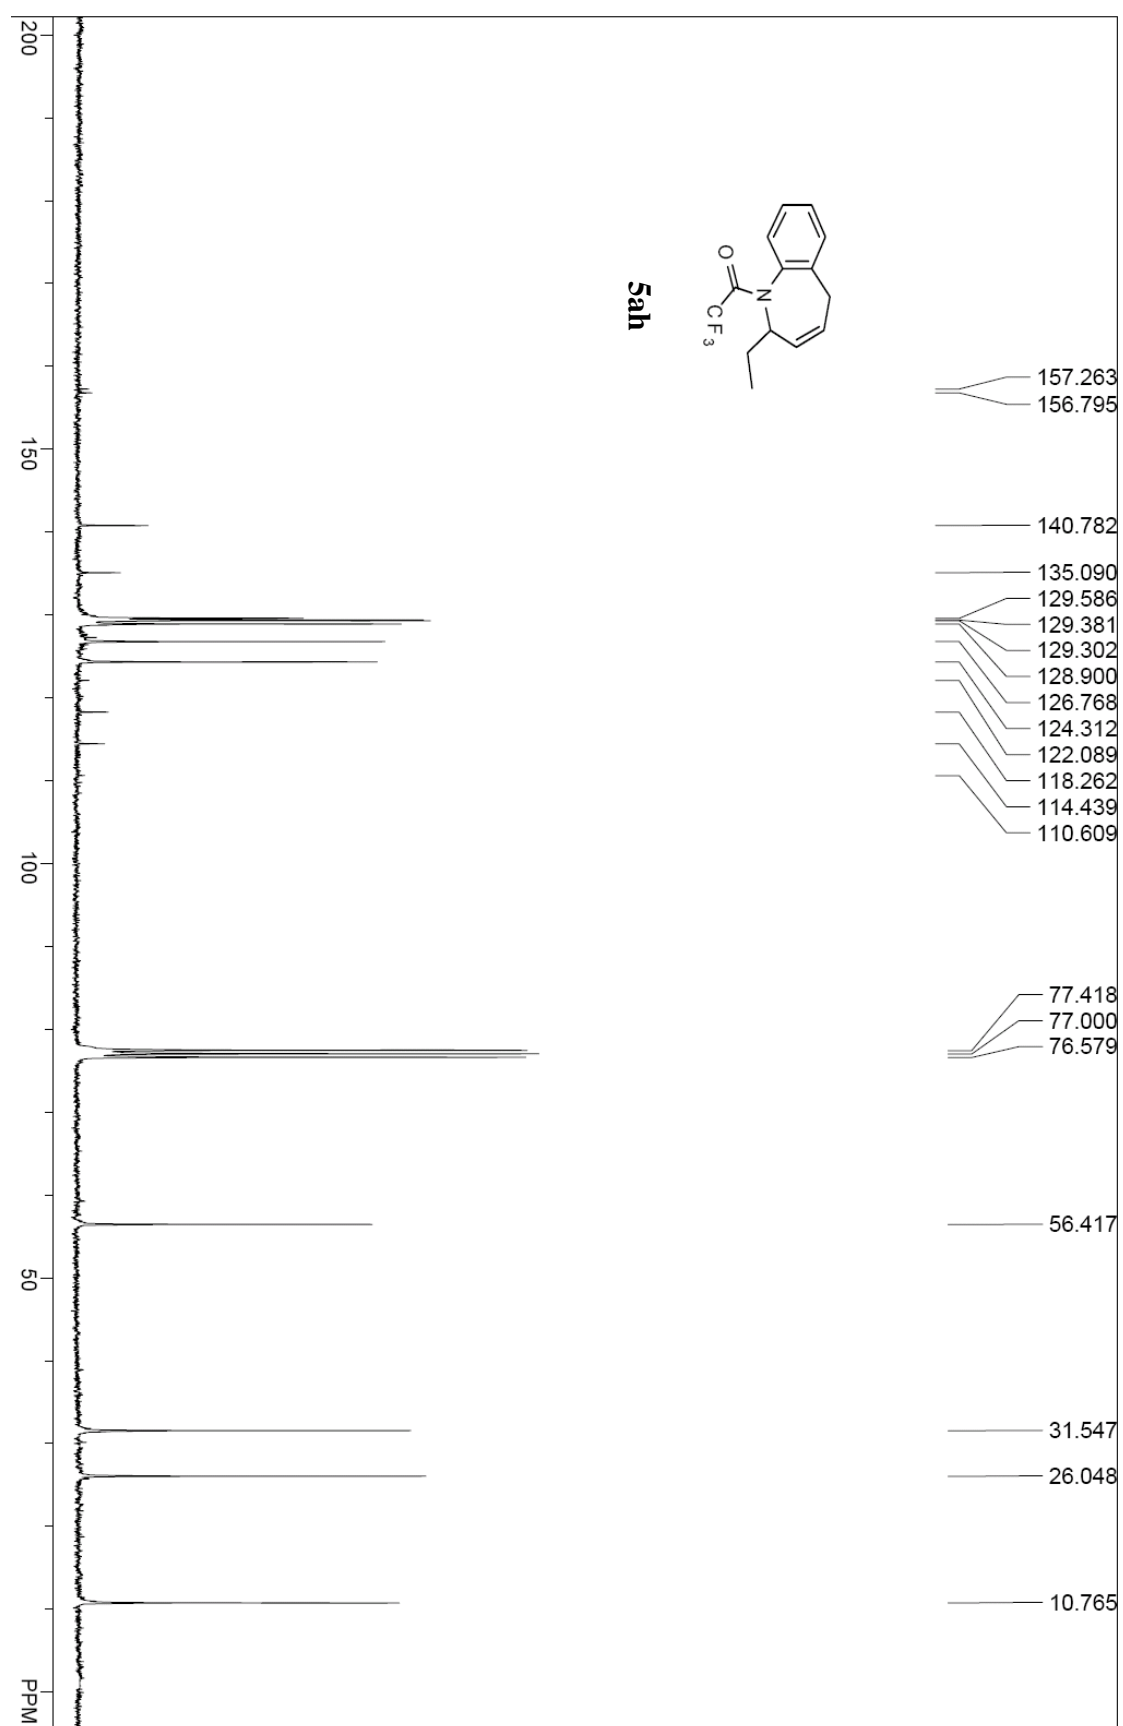

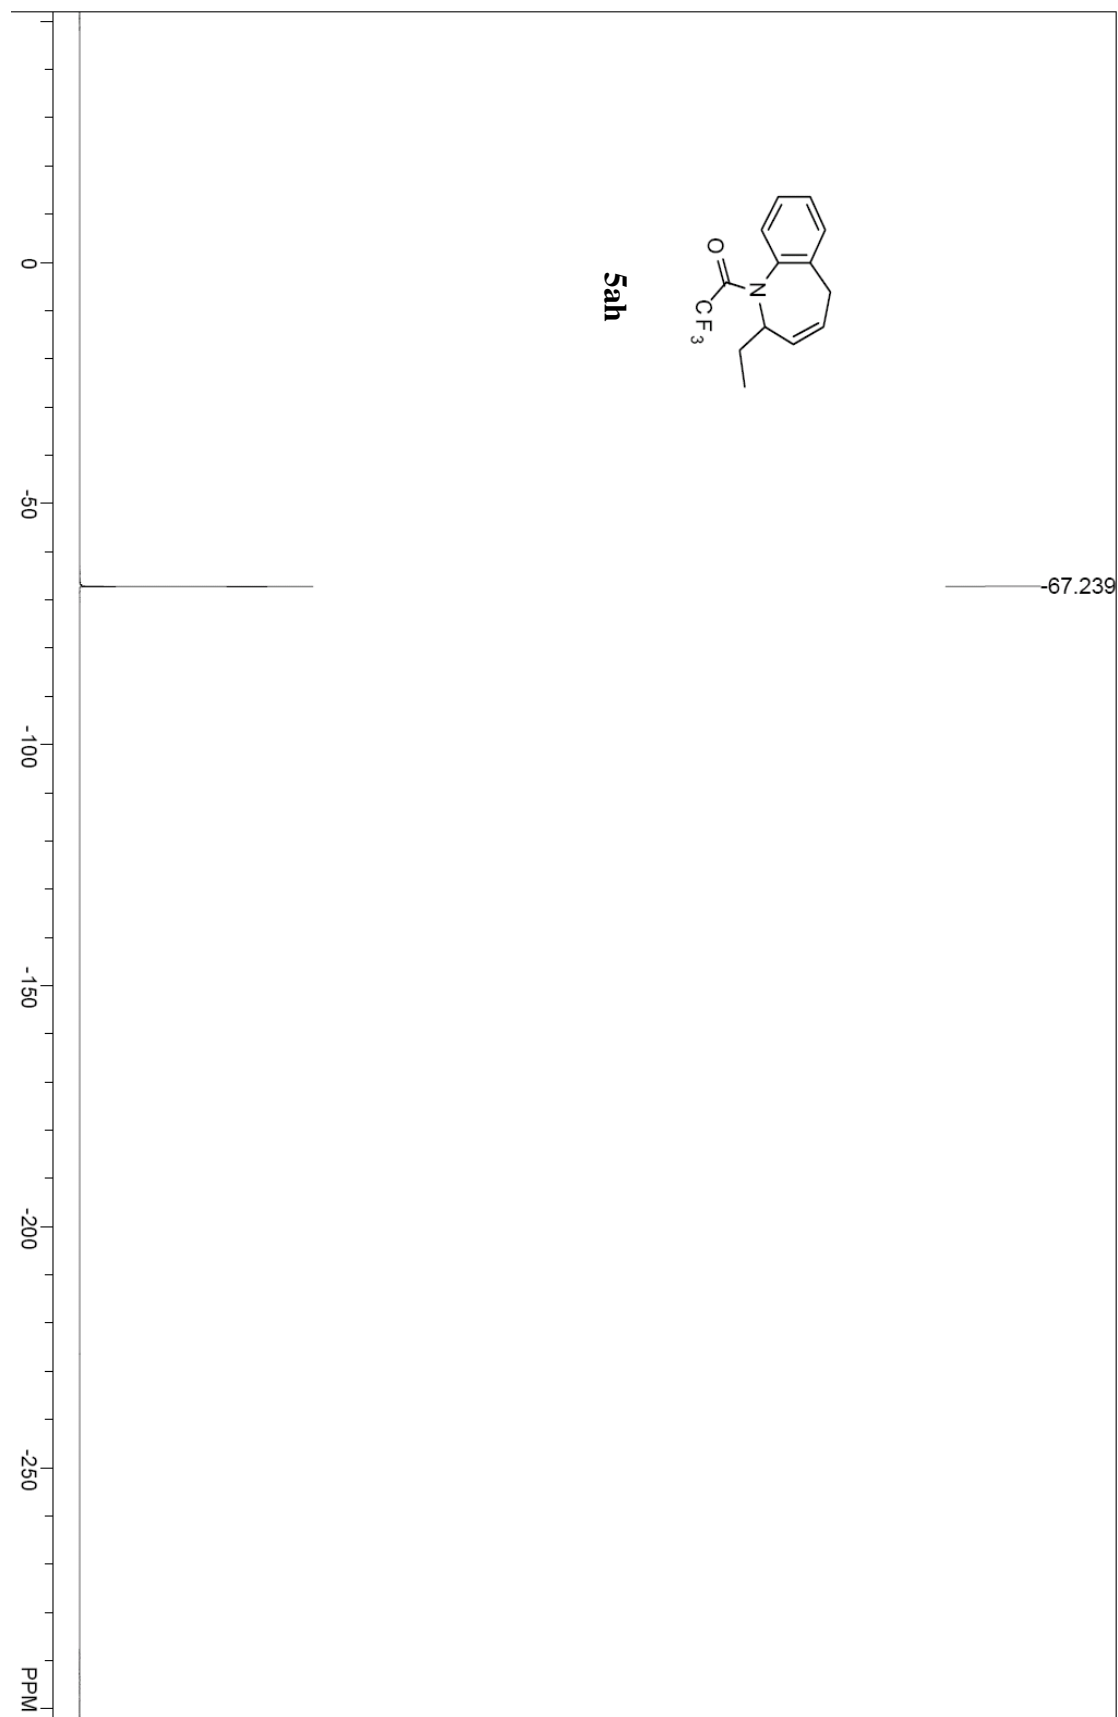

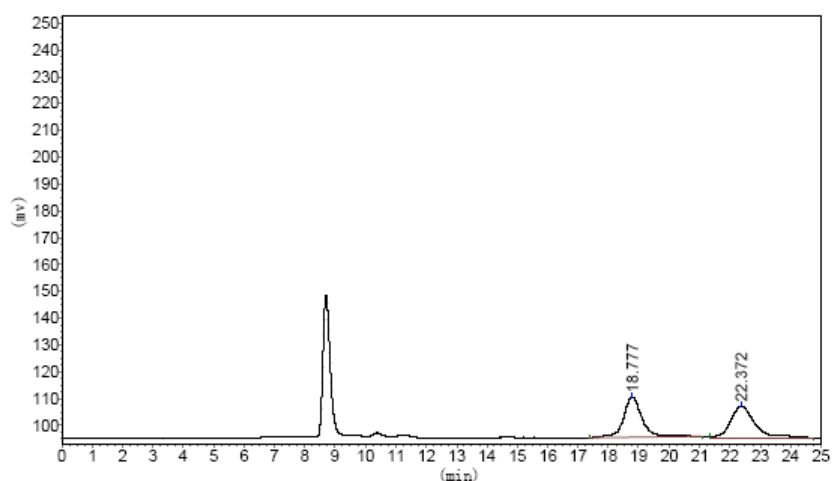

| Peak No.     | R. Time | Peak Height | Peak Area   | Percent  |
|--------------|---------|-------------|-------------|----------|
| 1            | 18.777  | 14906.413   | 637398.188  | 49.2962  |
| 2            | 22.372  | 11757.163   | 655597.938  | 50.7038  |
| <b>Total</b> |         | 26663.576   | 1292996.125 | 100.0000 |

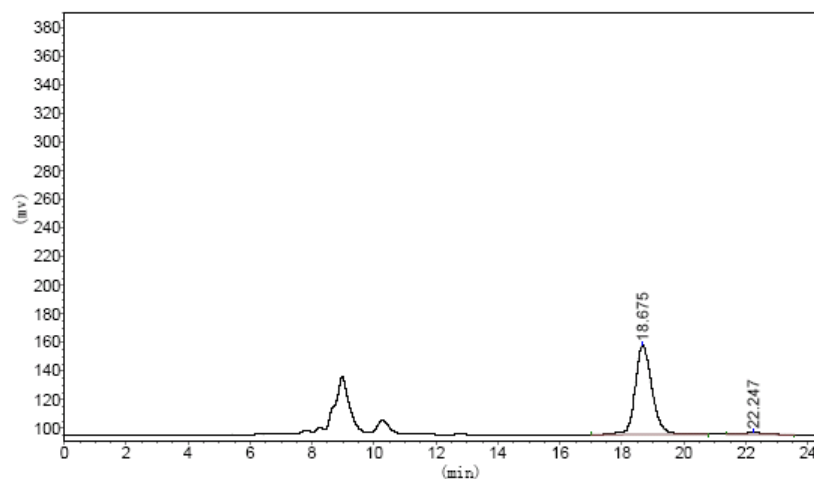

| Peak No.     | R. Time | Peak Height | Peak Area   | Percent  |
|--------------|---------|-------------|-------------|----------|
| 1            | 18.675  | 62381.570   | 2346107.750 | 97.3678  |
| 2            | 22.247  | 1275.824    | 63423.055   | 2.6322   |
| <b>Total</b> |         | 63657.394   | 2409530.805 | 100.0000 |
|              |         | 26663.576   | 1292996.125 | 100.0000 |

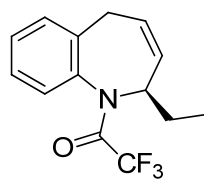

**5ah**

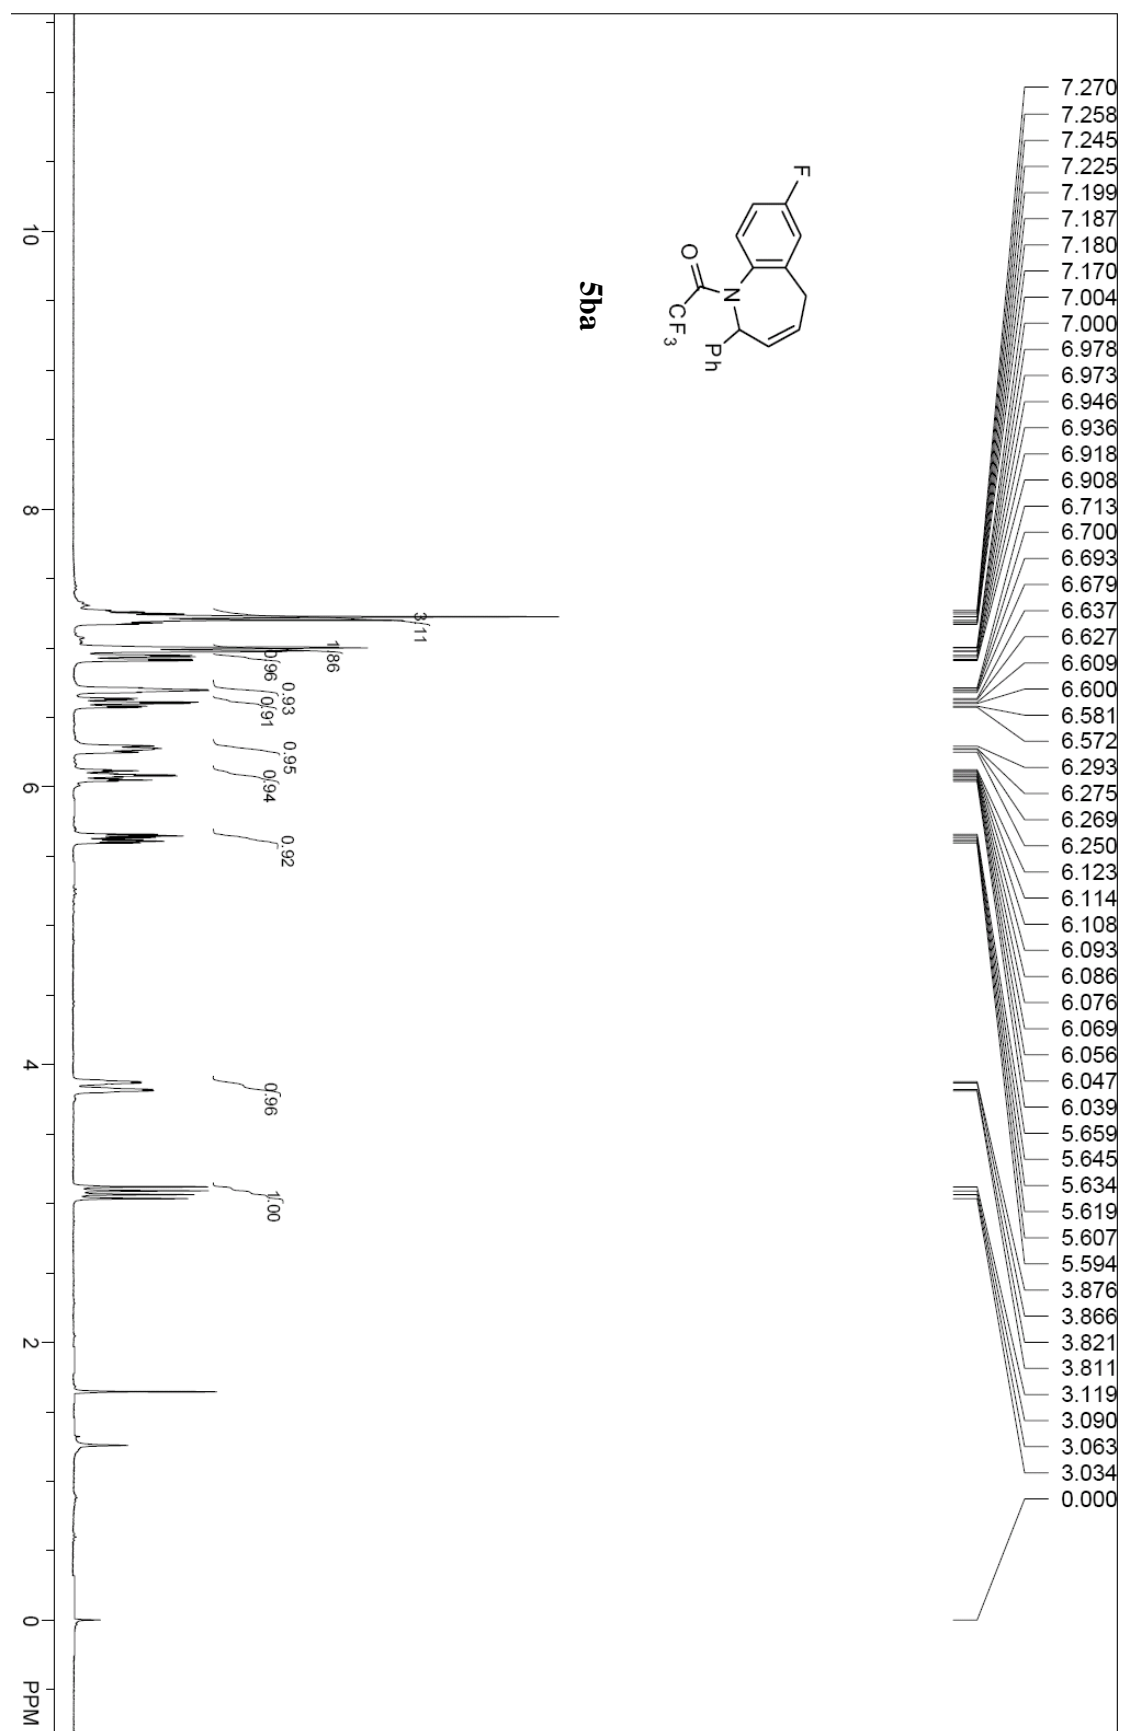

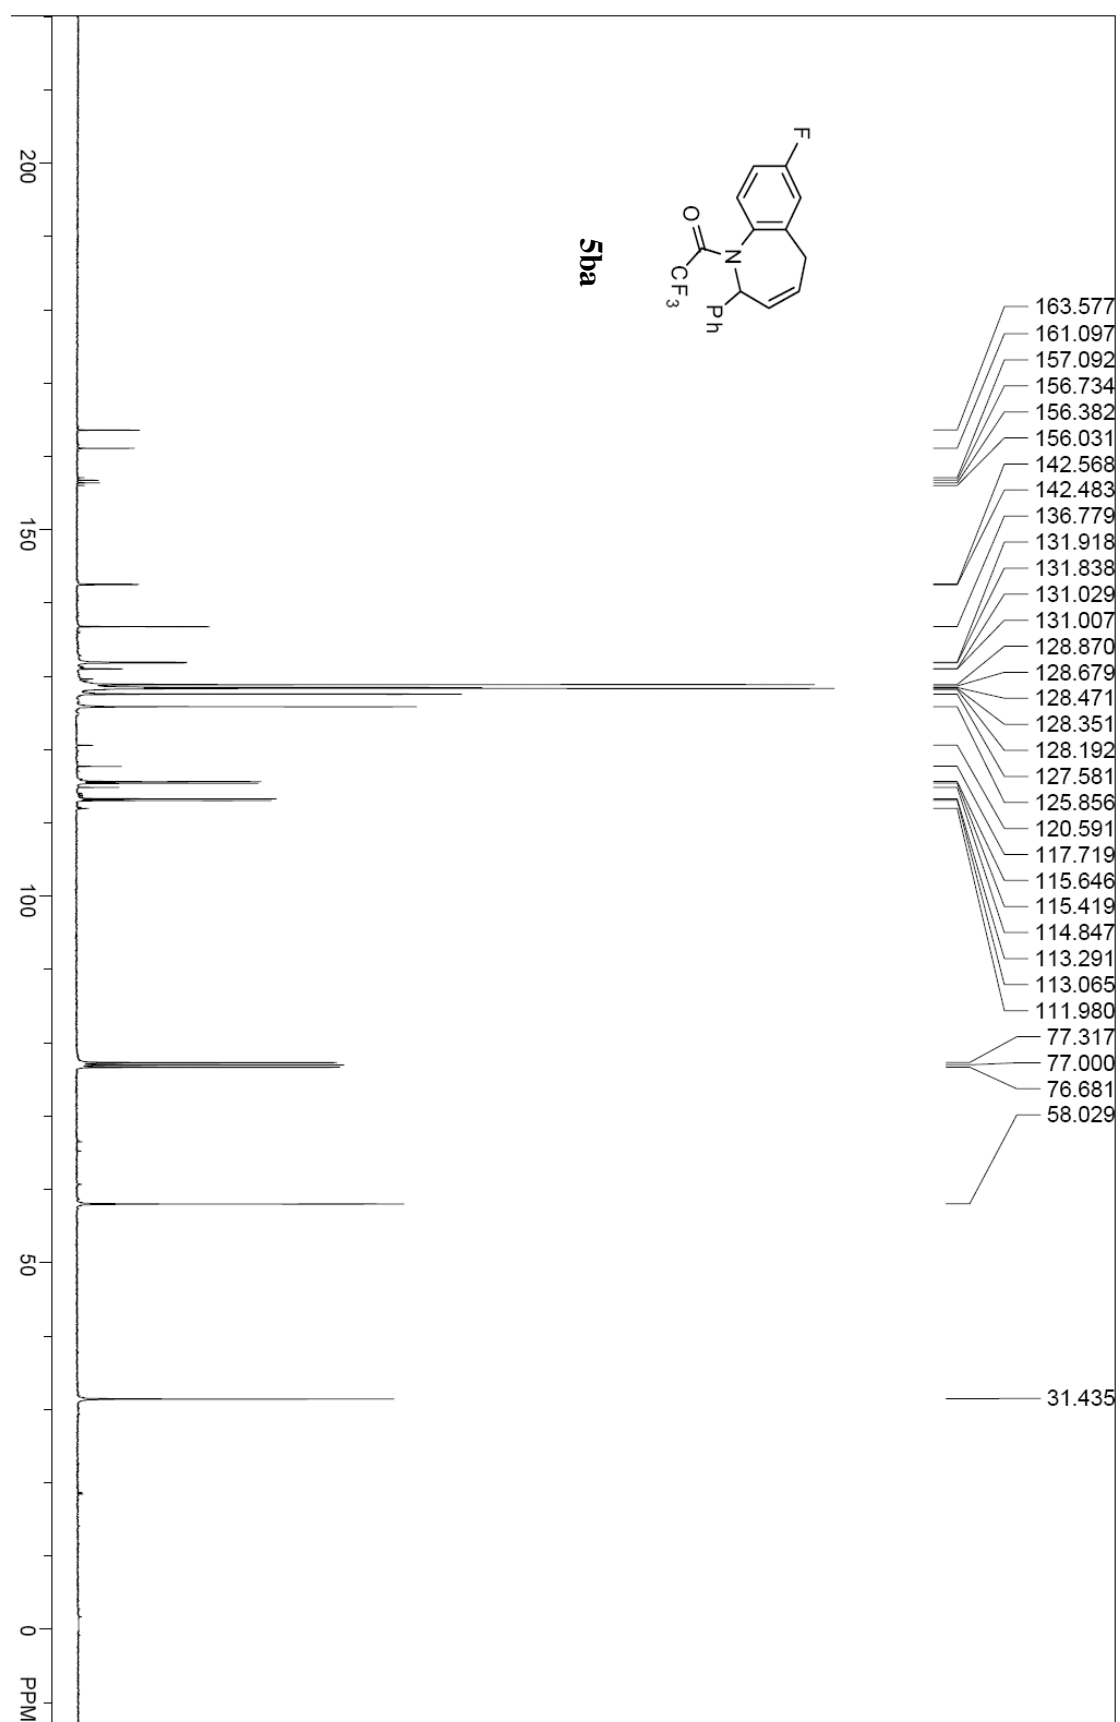



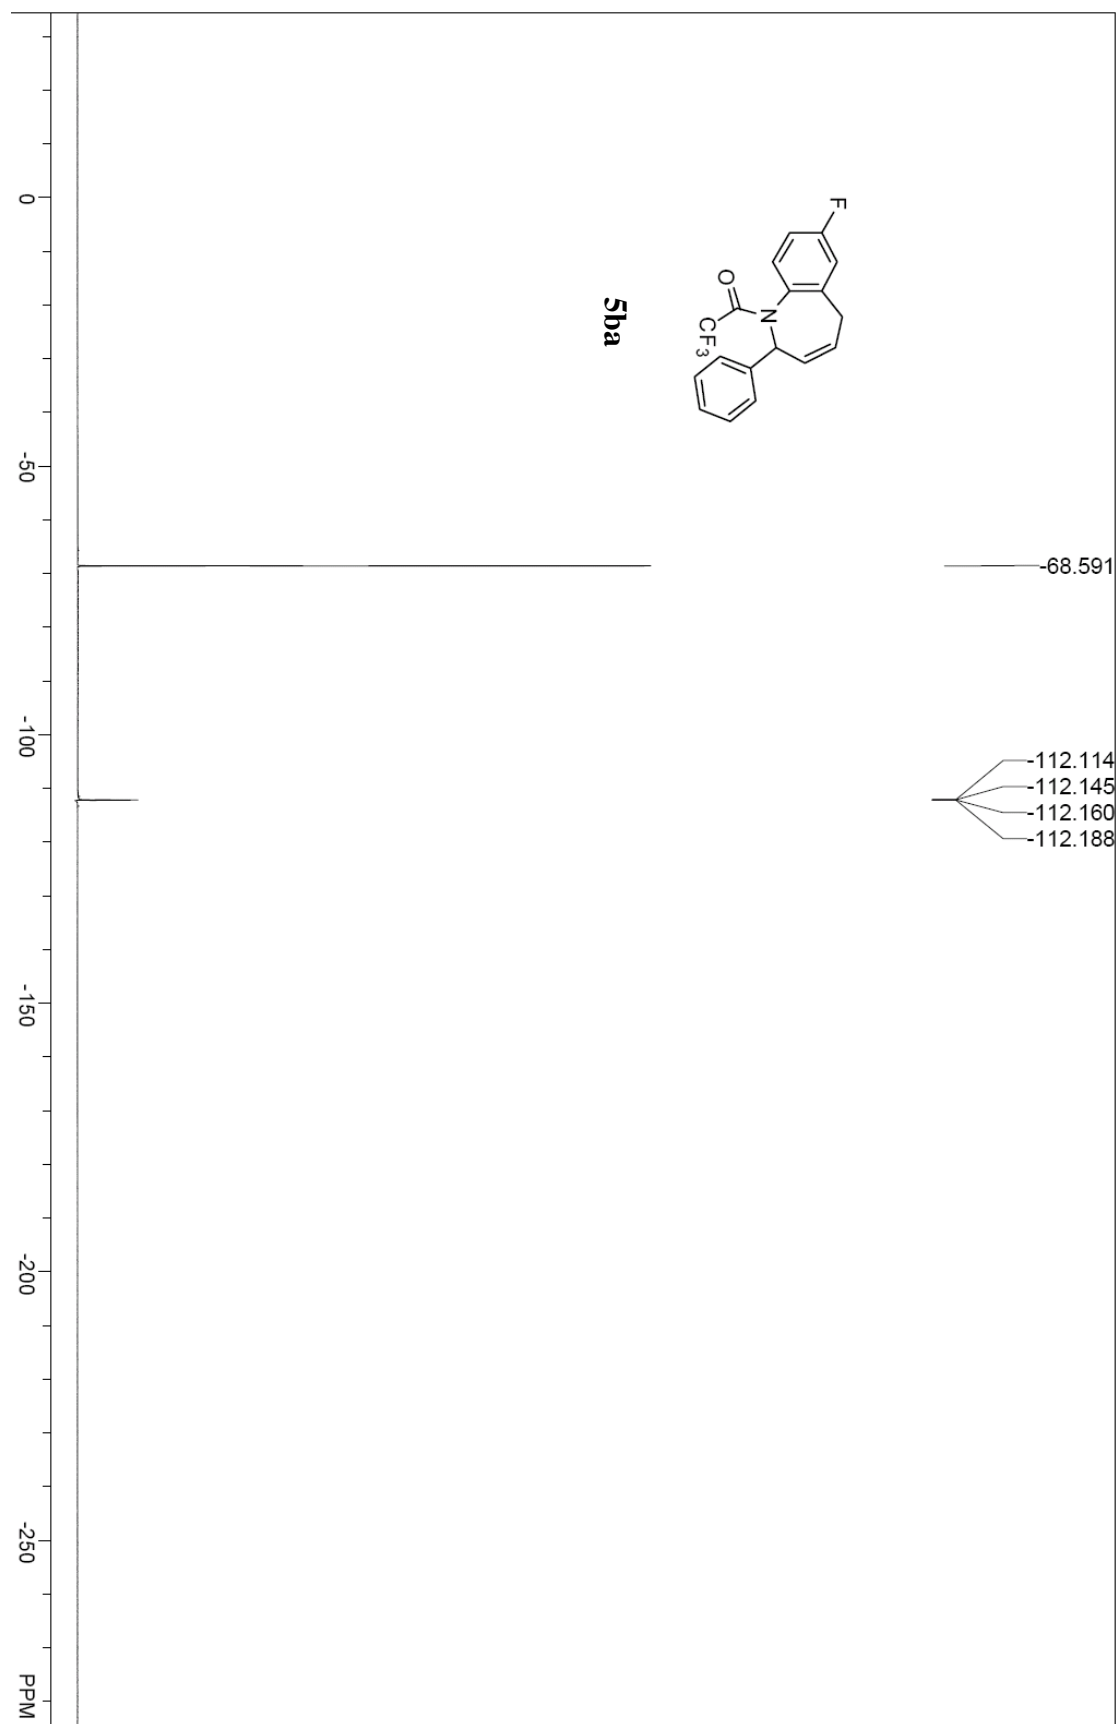

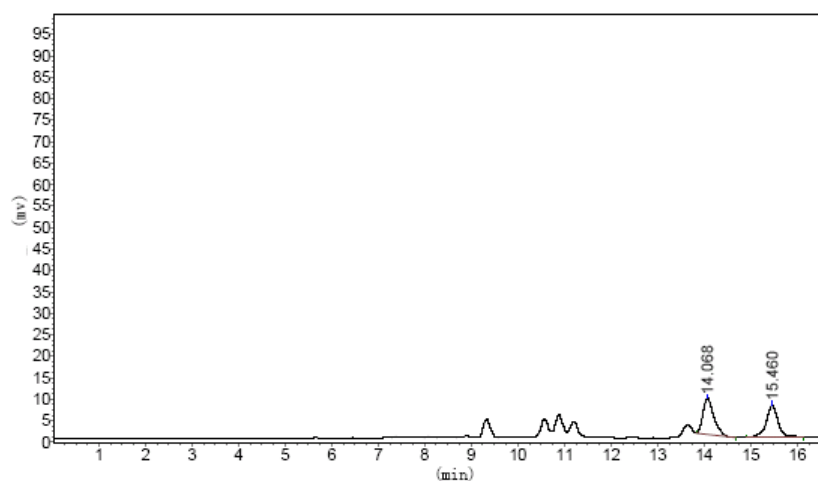

| Peak No.     | R. Time | Peak Height | Peak Area  | Percent  |
|--------------|---------|-------------|------------|----------|
| 1            | 14.068  | 8404.836    | 135836.344 | 49.2466  |
| 2            | 15.460  | 7514.309    | 139992.797 | 50.7534  |
| <b>Total</b> |         | 15919.145   | 275829.141 | 100.0000 |

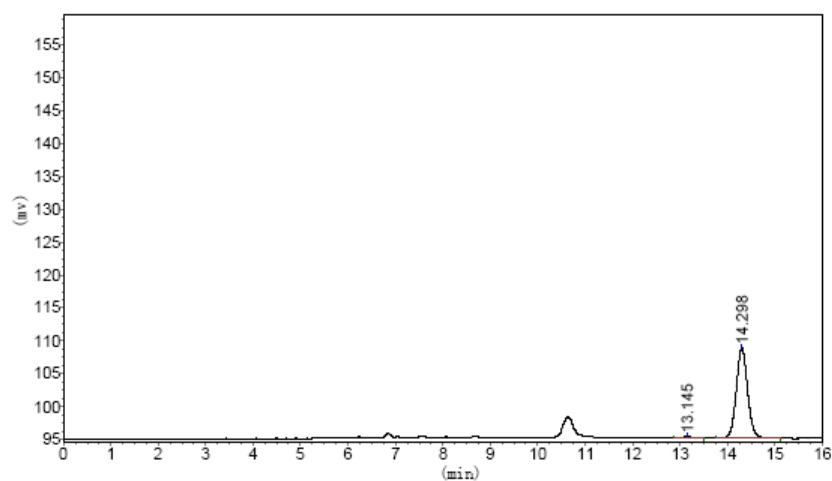

| Peak No.     | R. Time | Peak Height | Peak Area  | Percent  |
|--------------|---------|-------------|------------|----------|
| 1            | 13.145  | 263.153     | 3746.624   | 1.6139   |
| 2            | 14.298  | 13697.196   | 228402.406 | 98.3861  |
| <b>Total</b> |         | 13960.349   | 232149.030 | 100.0000 |

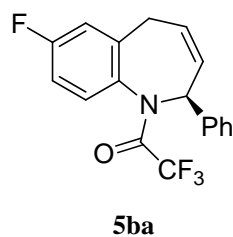

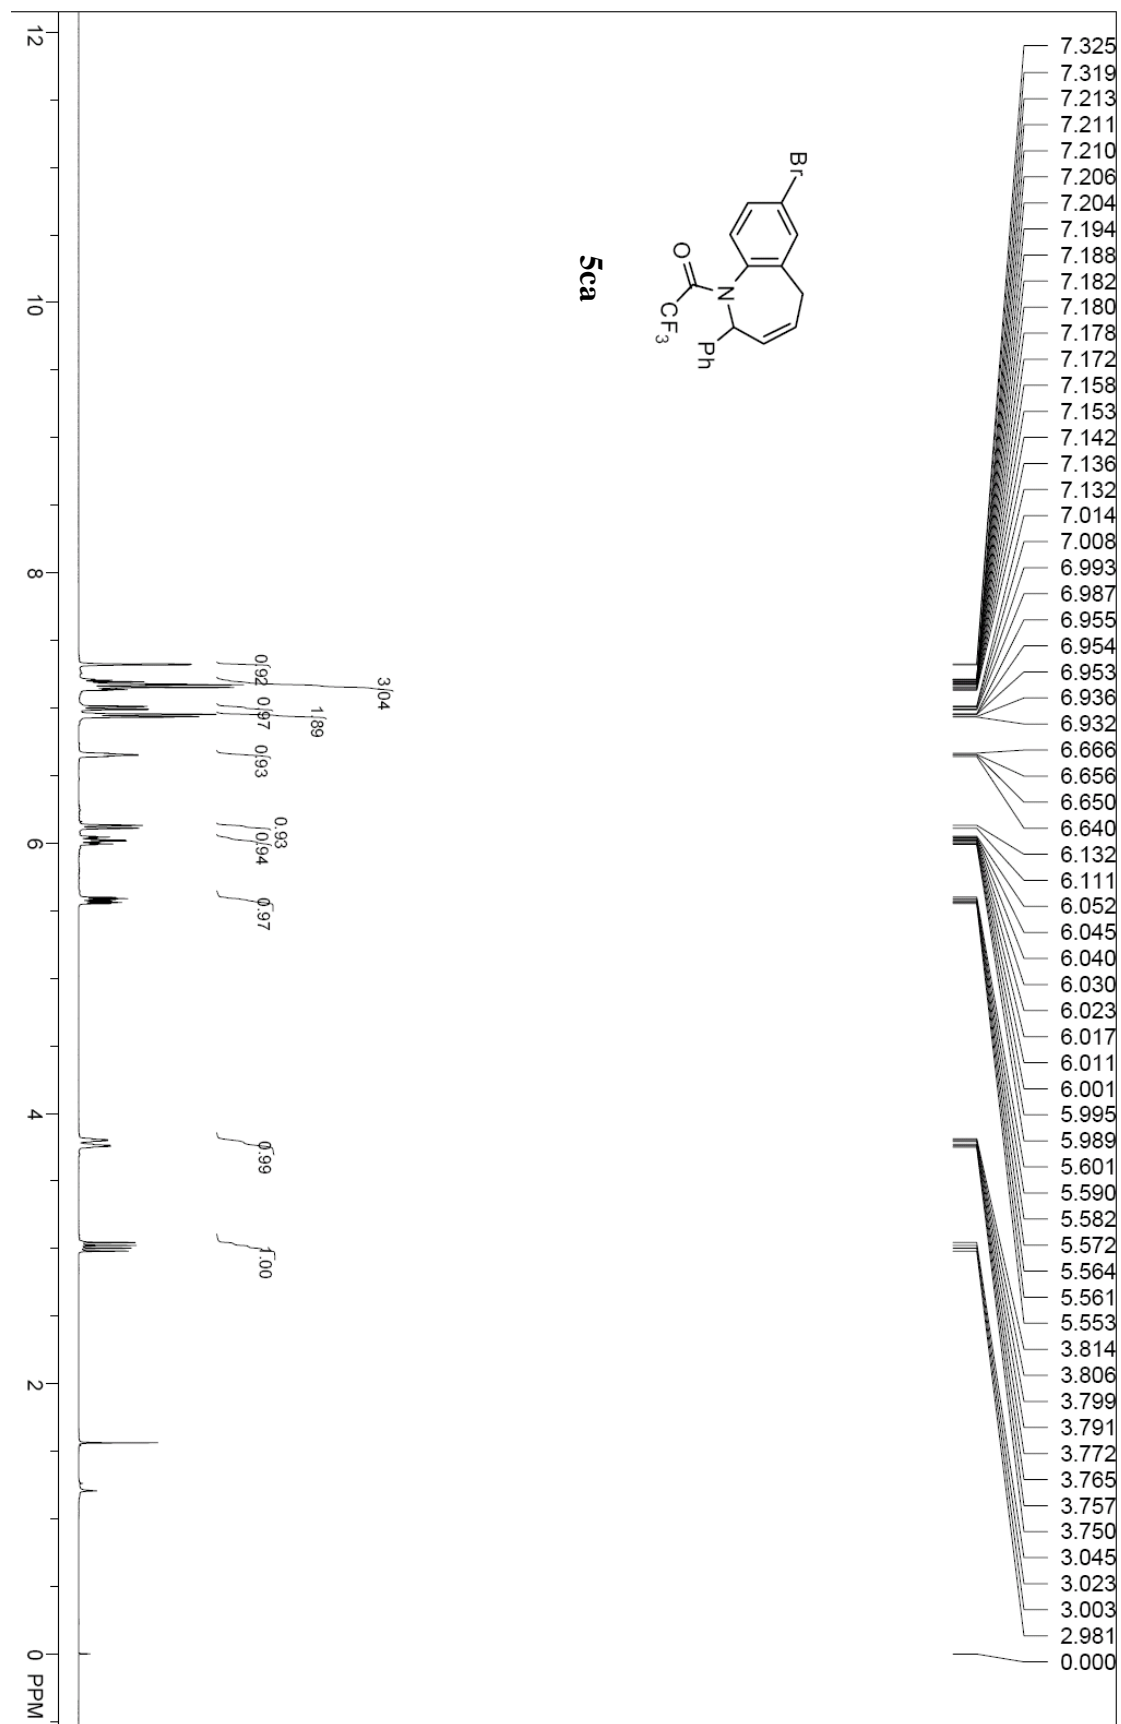

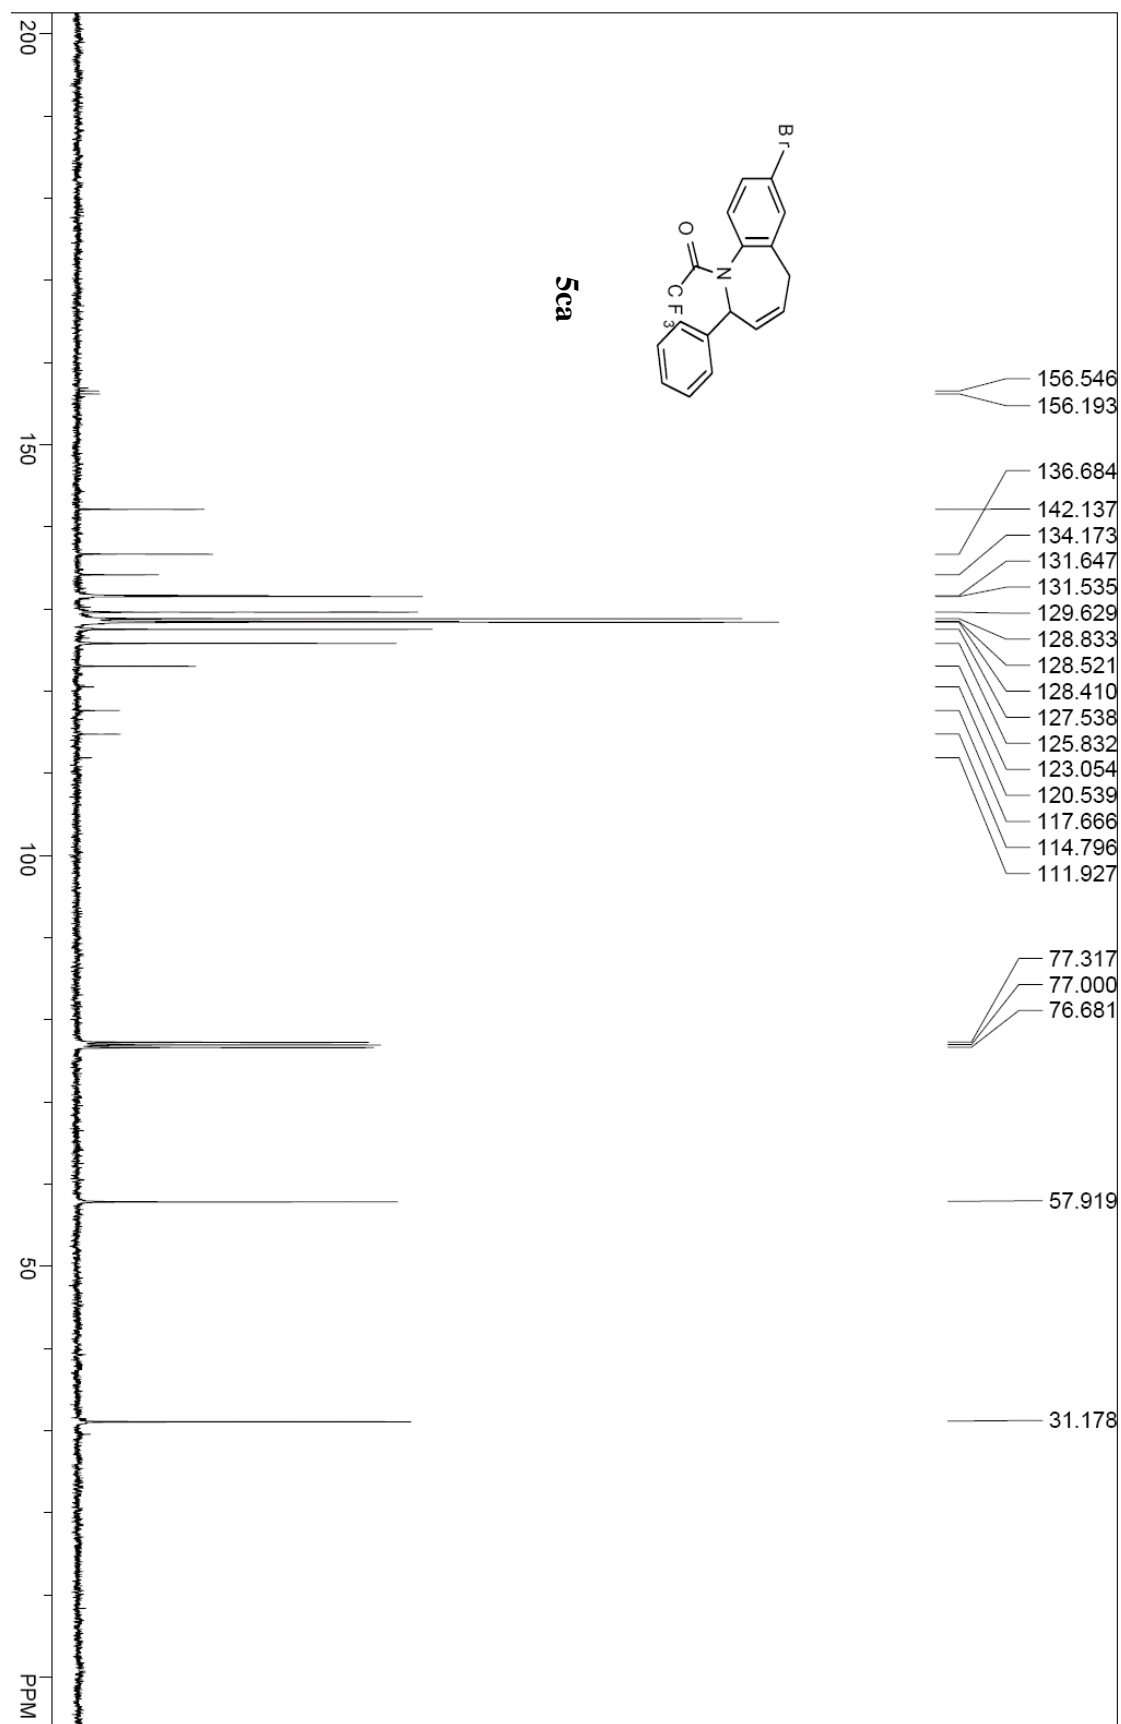

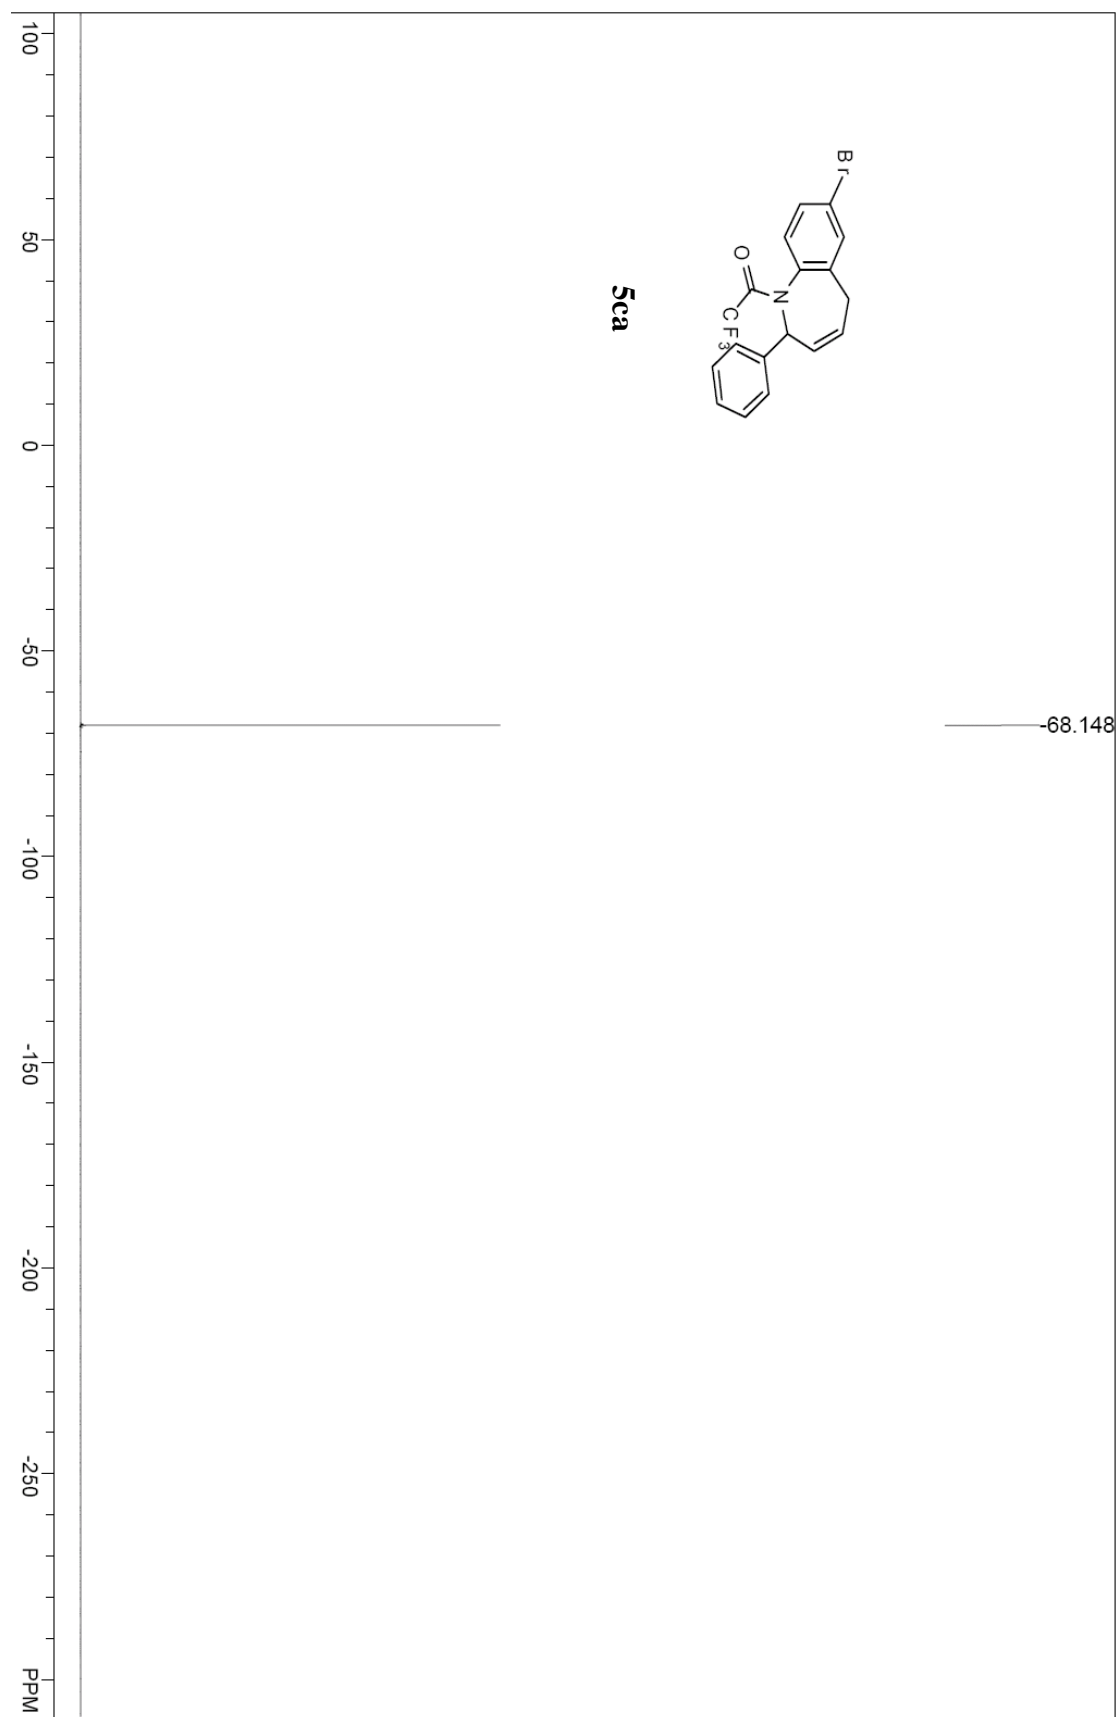

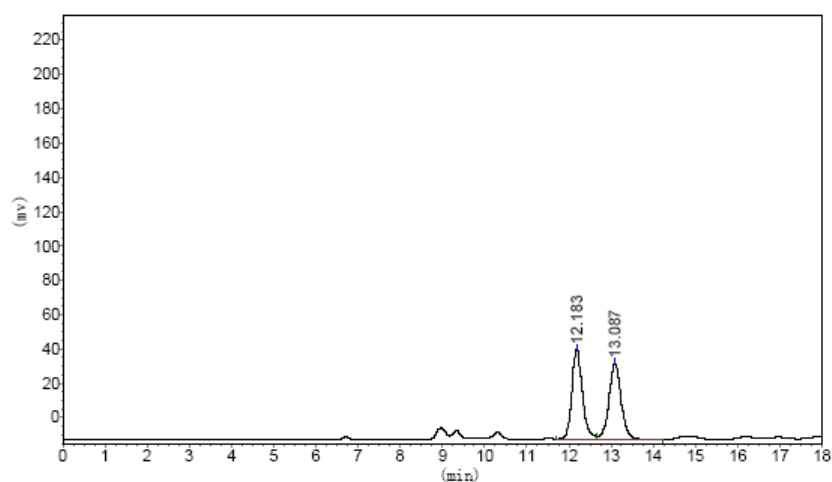

| Peak No. | R. Time | Peak Height | Peak Area   | Percent  |
|----------|---------|-------------|-------------|----------|
| 1        | 12.183  | 52729.680   | 922707.563  | 50.7469  |
| 2        | 13.087  | 44555.078   | 895546.125  | 49.2531  |
| Total    |         | 97284.758   | 1818253.688 | 100.0000 |

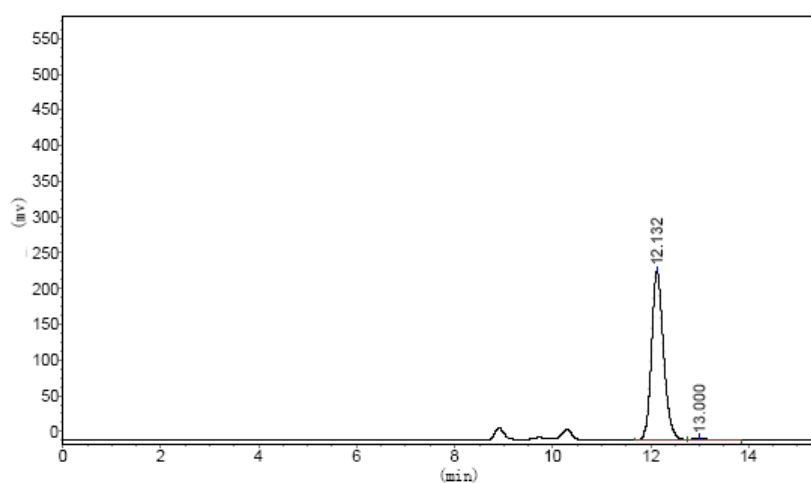

| Peak No. | R. Time | Peak Height | Peak Area   | Percent  |
|----------|---------|-------------|-------------|----------|
| 1        | 12.132  | 237533.656  | 4067913.500 | 98.3538  |
| 2        | 13.000  | 3348.846    | 68087.547   | 1.6462   |
| Total    |         | 240882.502  | 4136001.047 | 100.0000 |

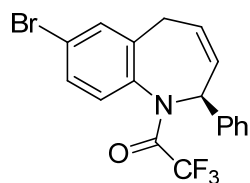

**5ca**

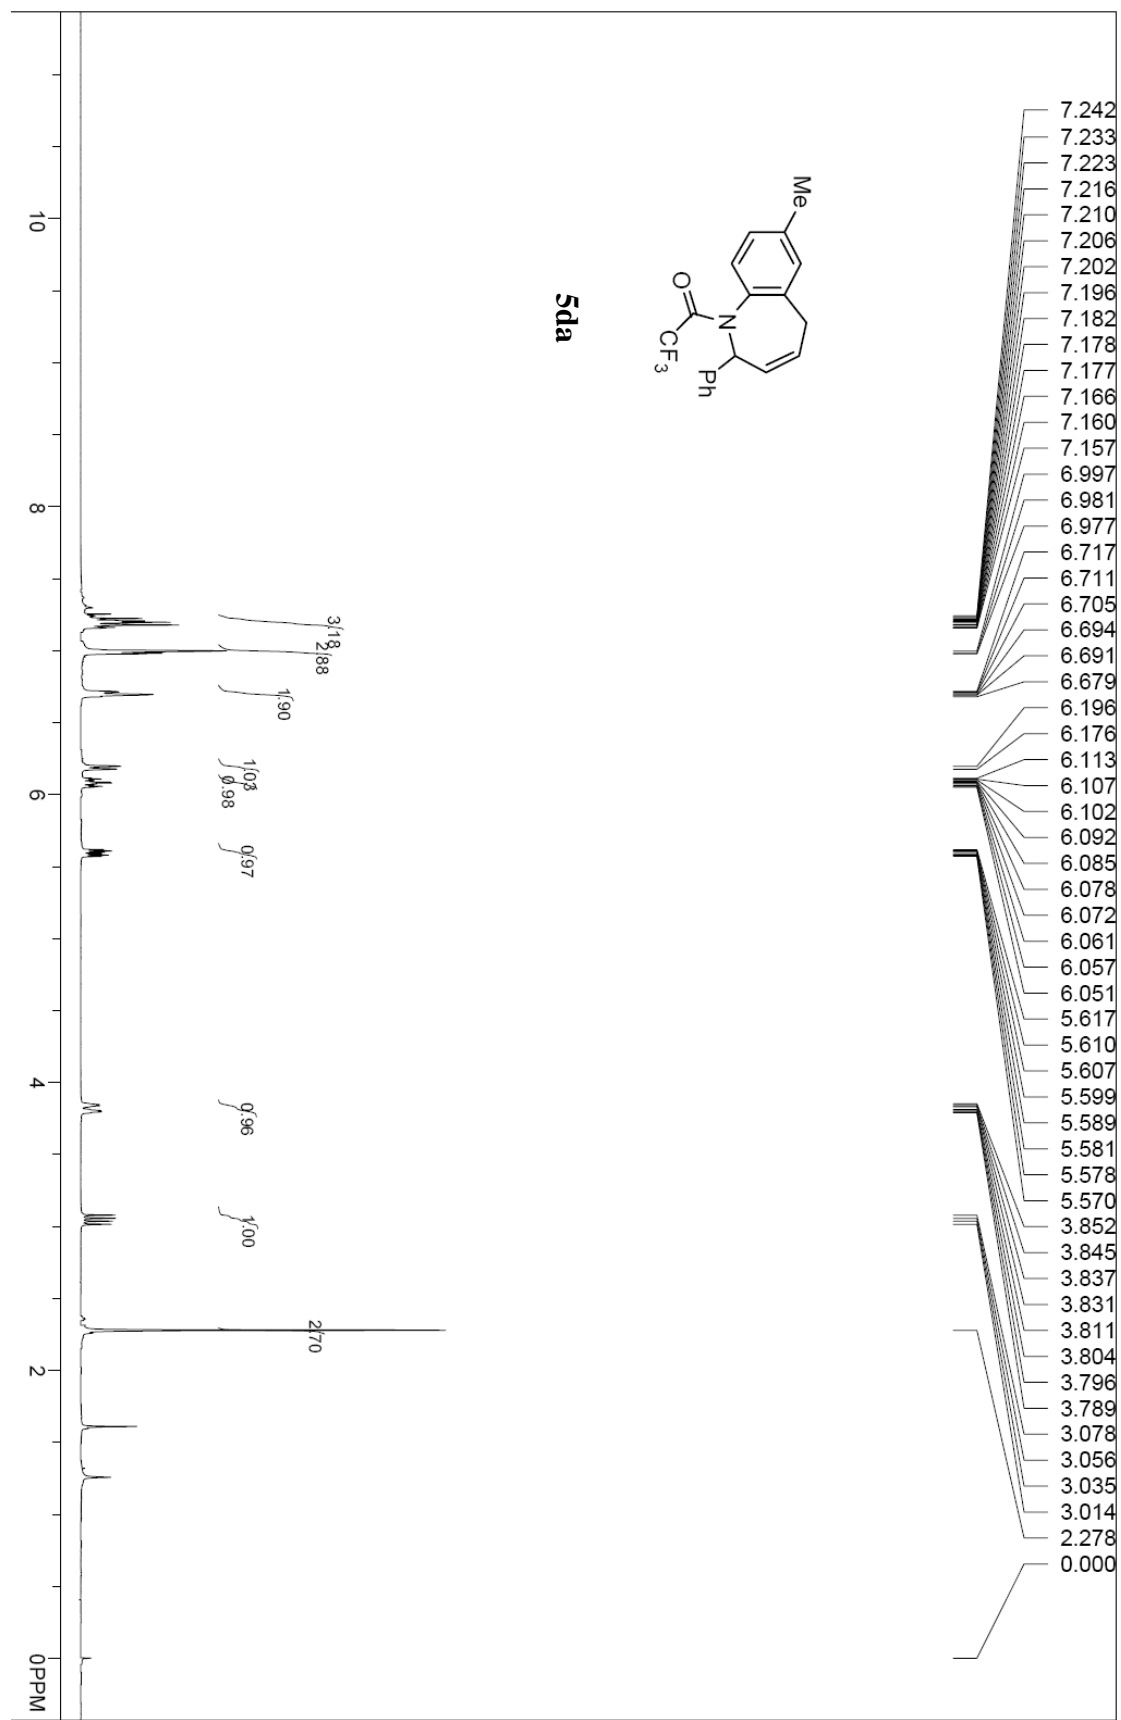

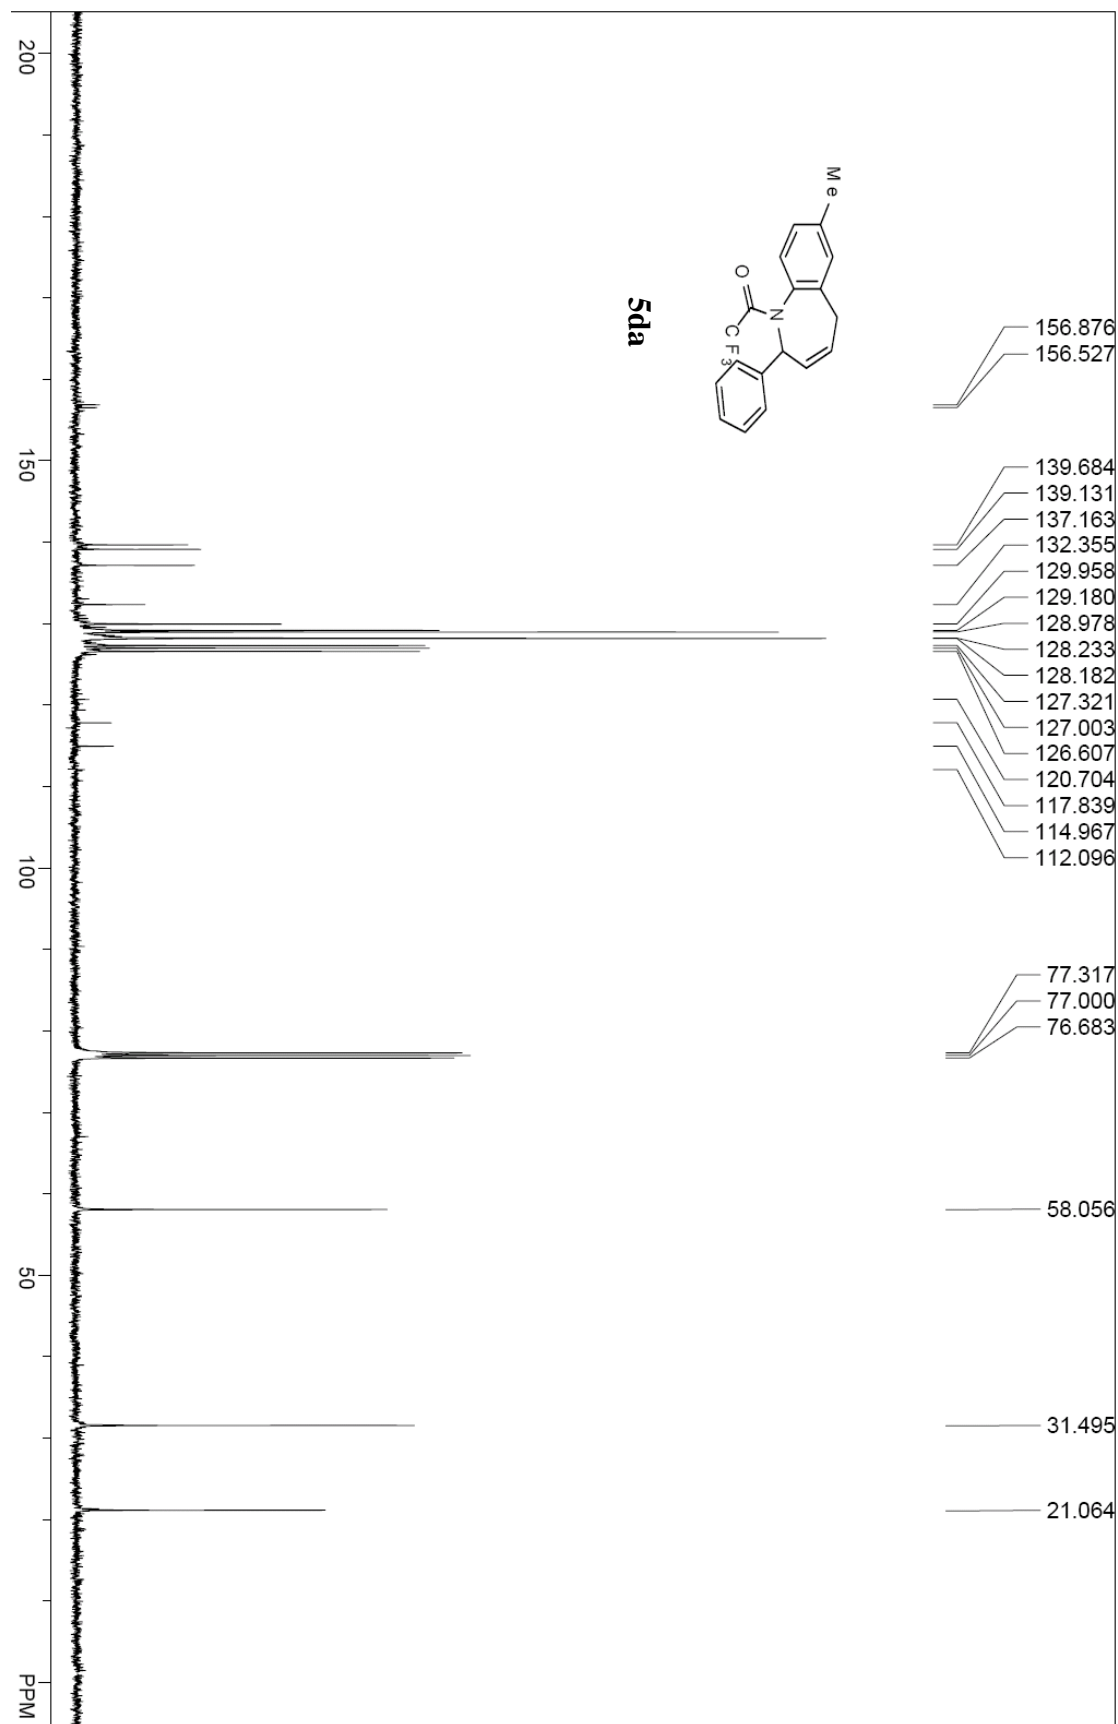



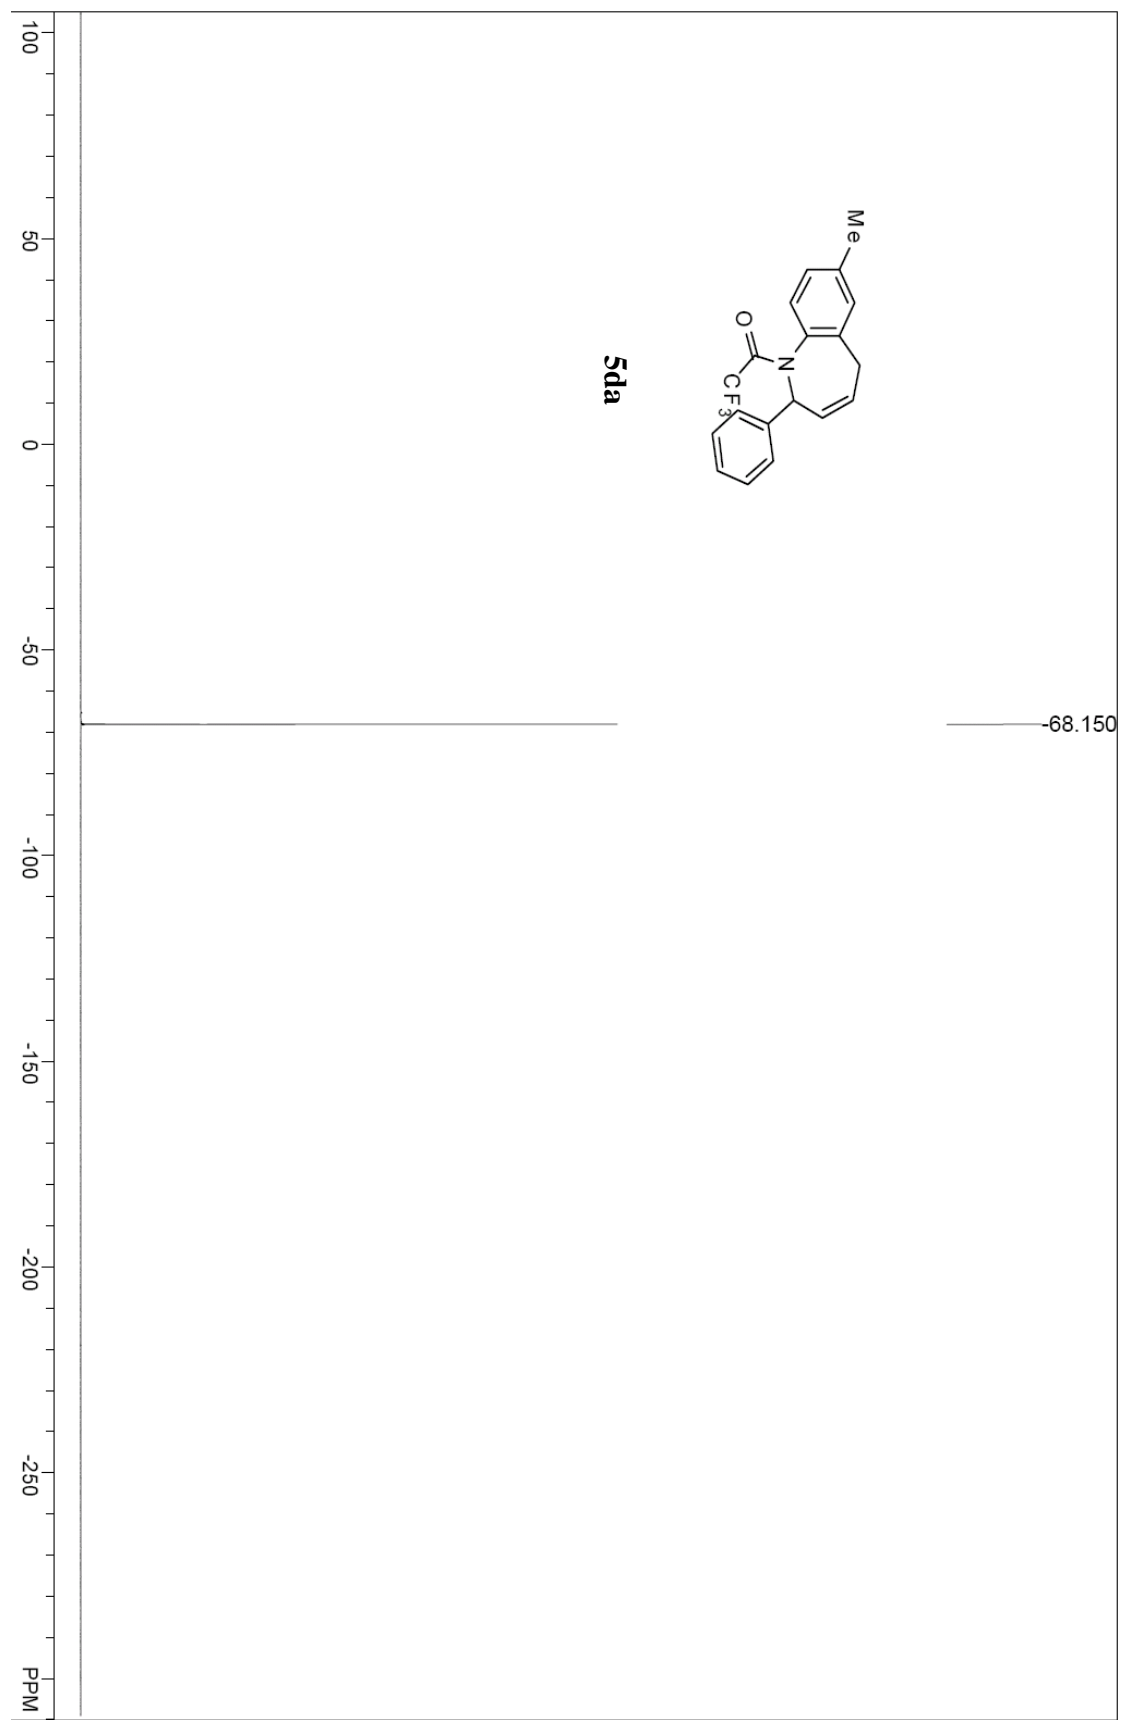

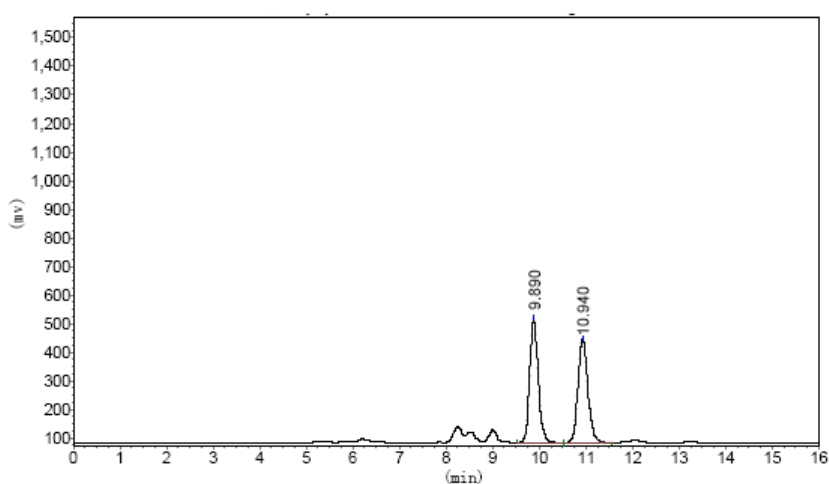

| Peak No.     | R. Time | Peak Height | Peak Area    | Percent  |
|--------------|---------|-------------|--------------|----------|
| 1            | 9.890   | 436080.188  | 5653919.000  | 50.6839  |
| 2            | 10.940  | 363155.188  | 5501343.000  | 49.3161  |
| <b>Total</b> |         | 799235.375  | 11155262.000 | 100.0000 |

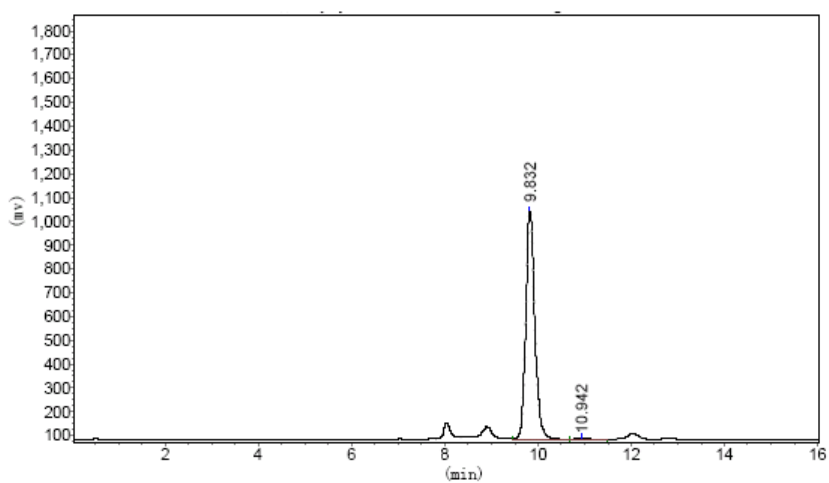

| Peak No.     | R. Time | Peak Height | Peak Area    | Percent  |
|--------------|---------|-------------|--------------|----------|
| 1            | 9.832   | 961566.938  | 13082614.000 | 98.7814  |
| 2            | 10.942  | 8498.422    | 161395.188   | 1.2186   |
| <b>Total</b> |         | 970065.359  | 13244009.188 | 100.0000 |

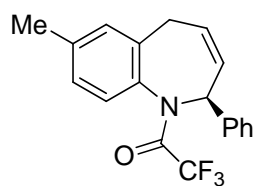

**5da**

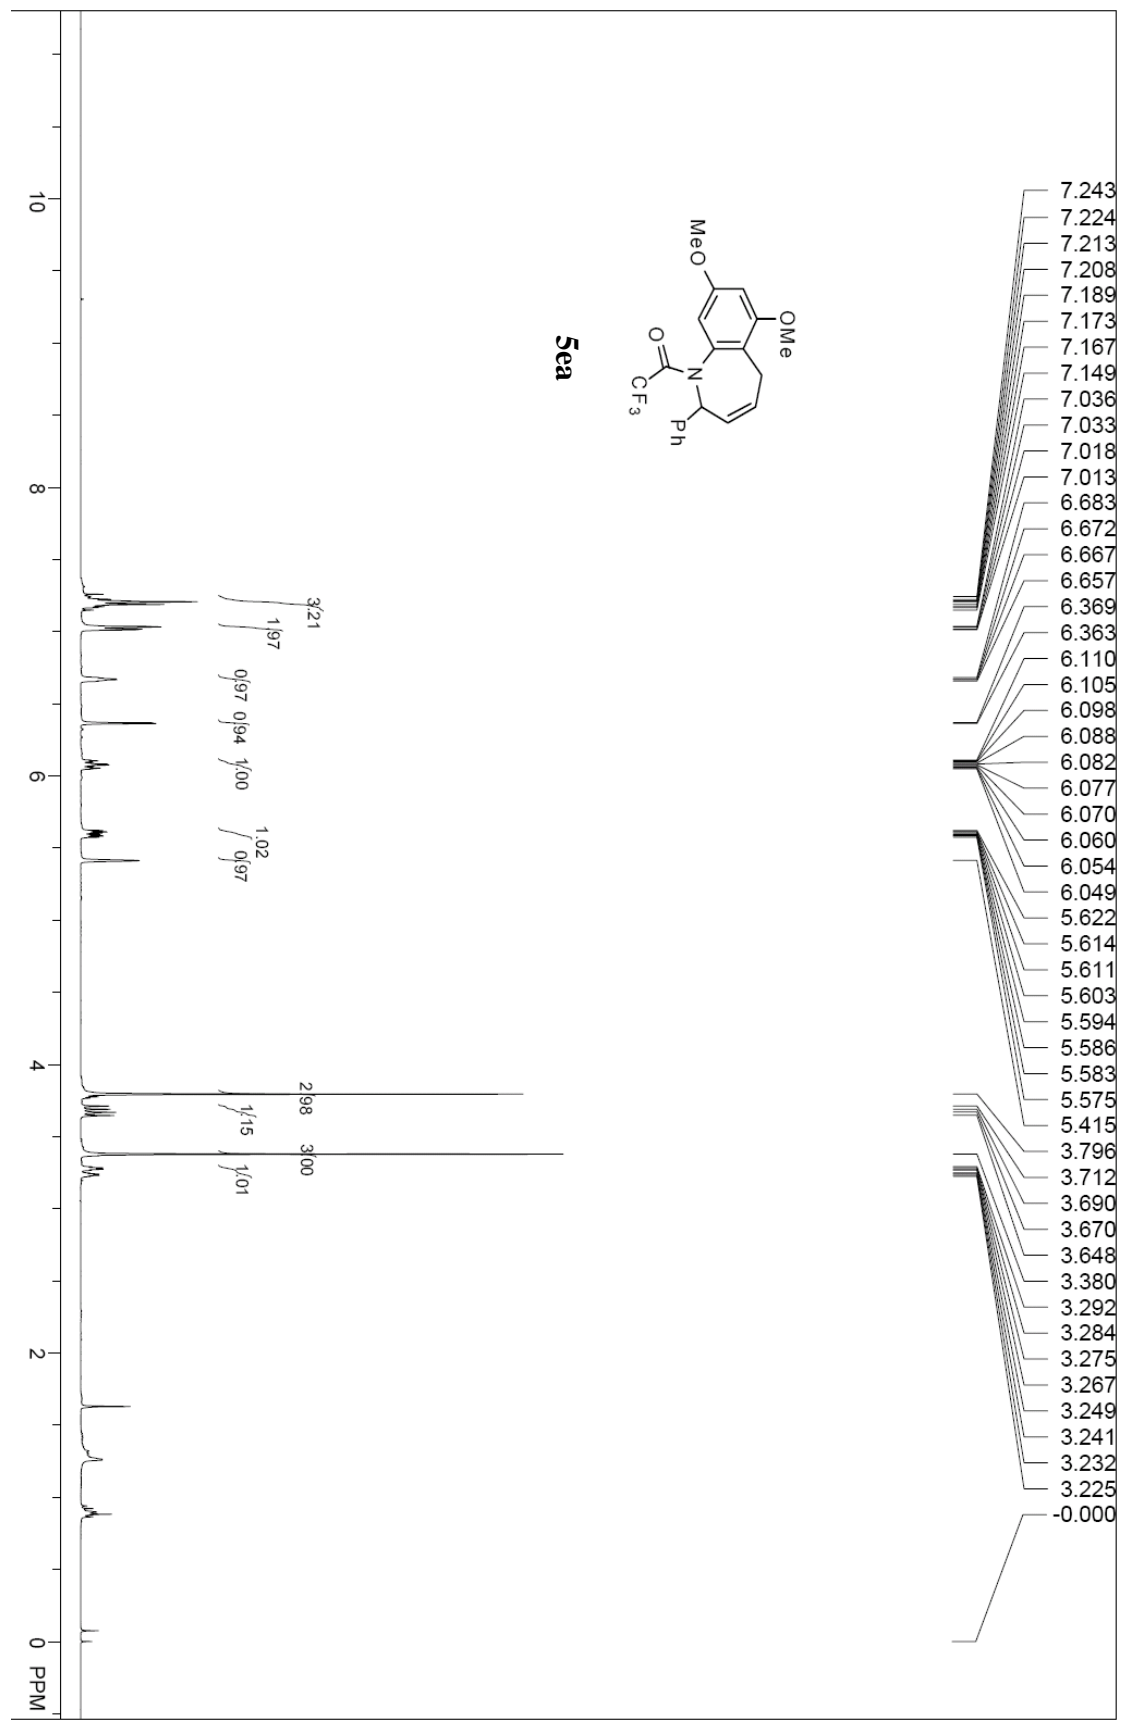

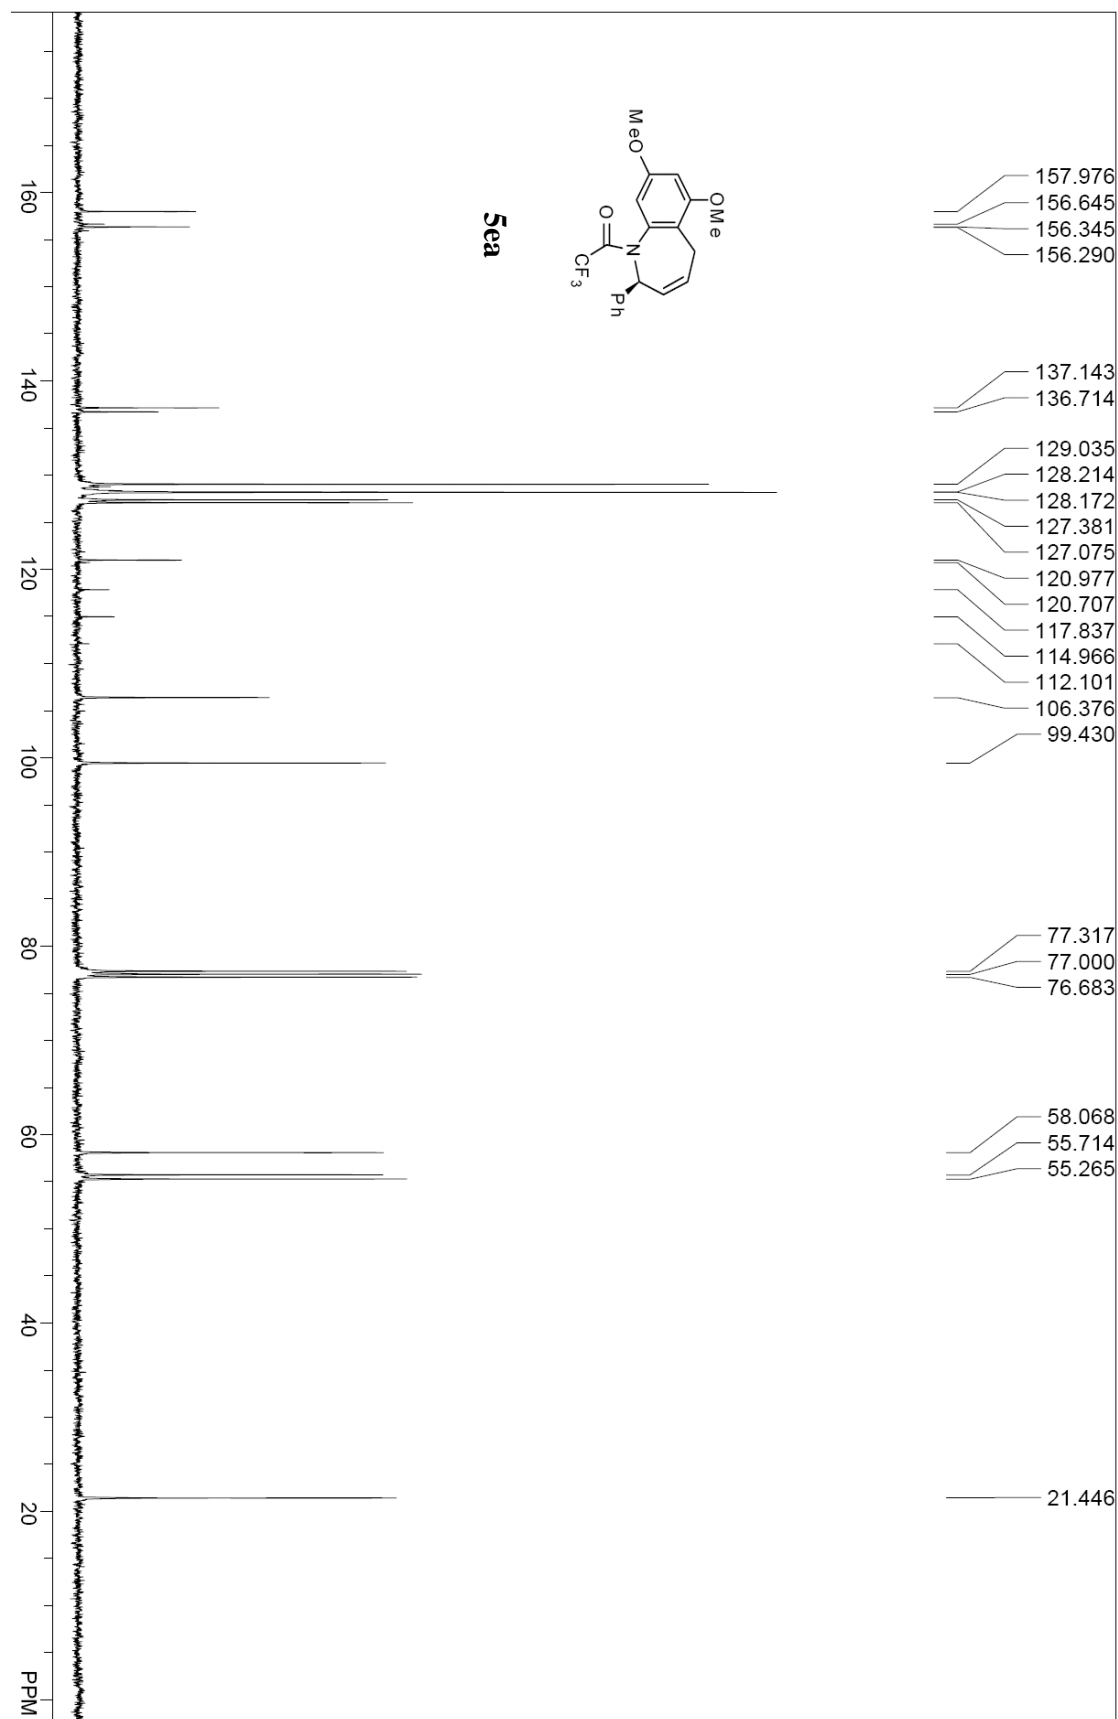

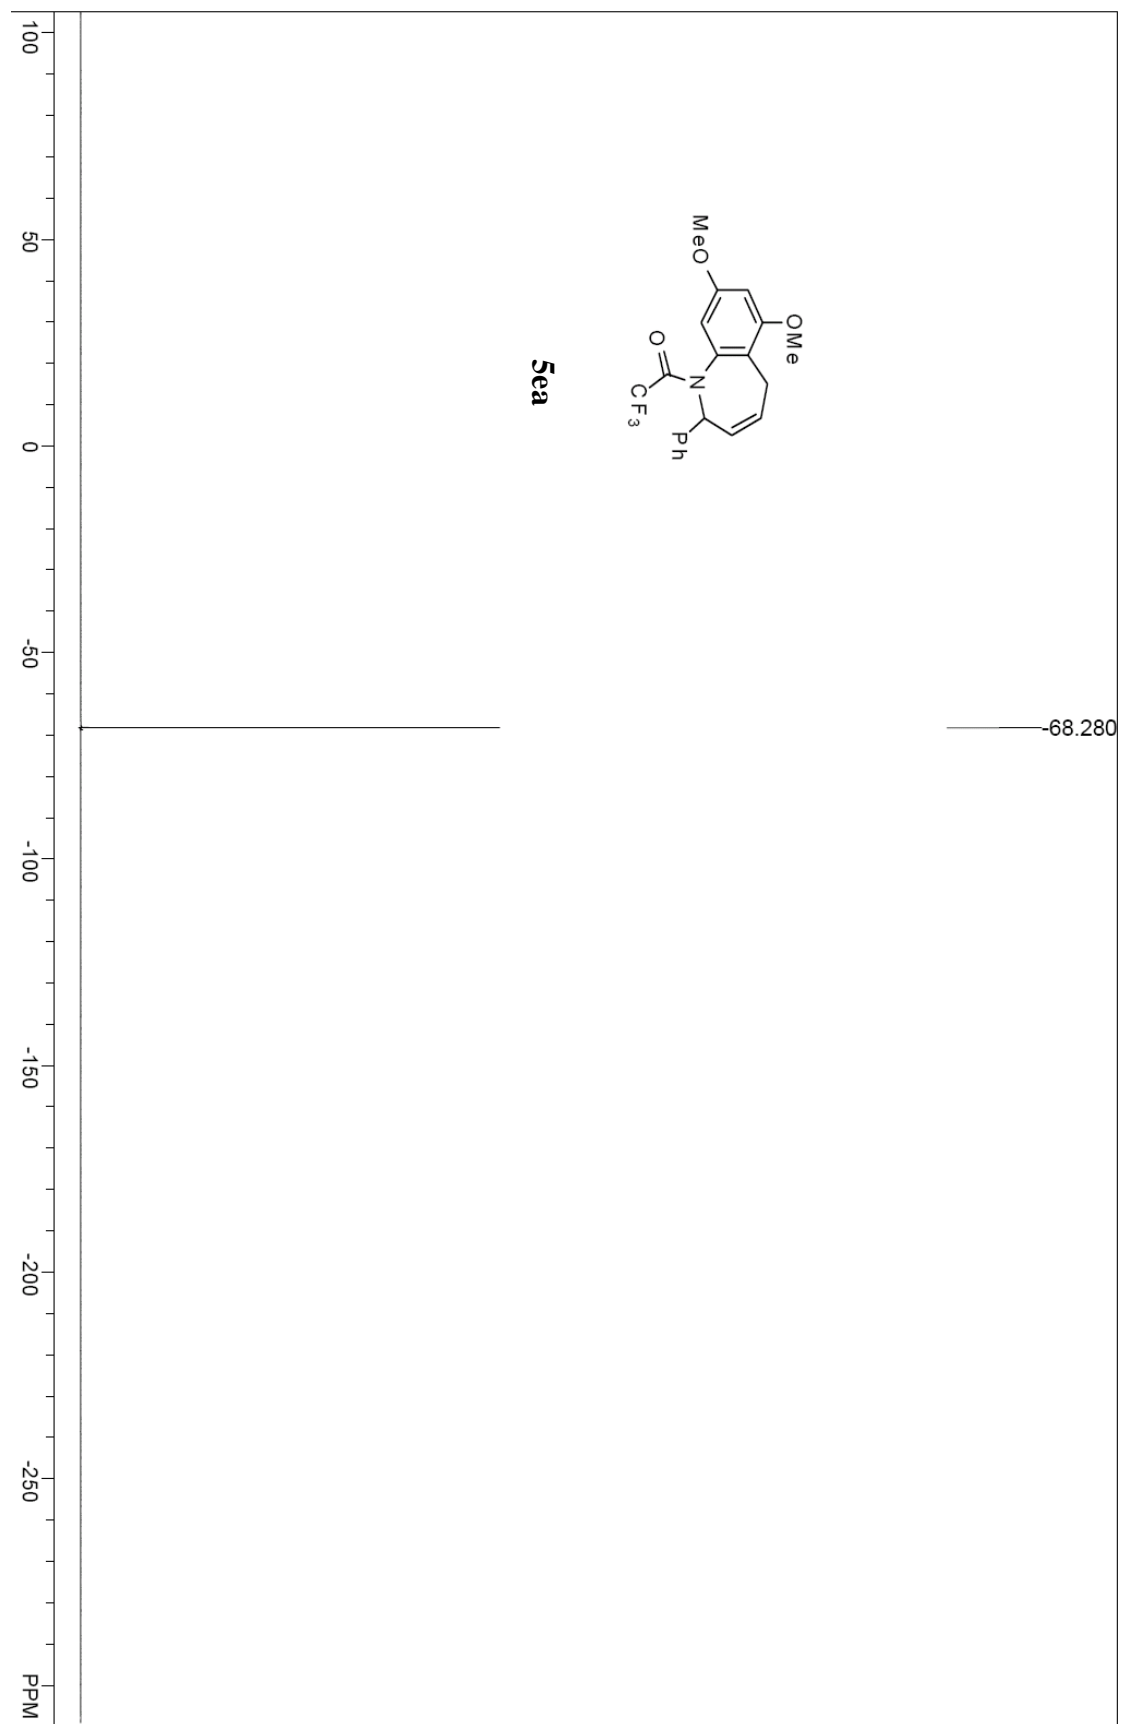

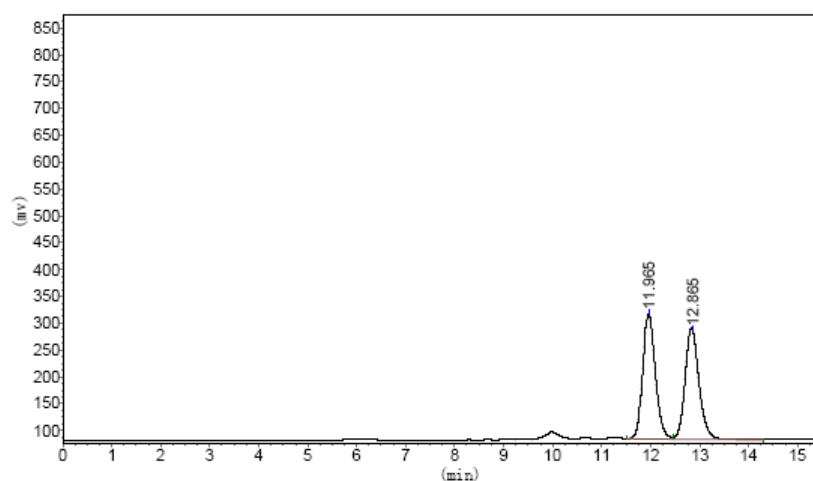

| Peak No.     | R. Time | Peak Height | Peak Area   | Percent  |
|--------------|---------|-------------|-------------|----------|
| 1            | 11.965  | 233040.766  | 4263858.000 | 50.6365  |
| 2            | 12.865  | 207159.047  | 4156664.750 | 49.3635  |
| <b>Total</b> |         | 440199.813  | 8420522.750 | 100.0000 |

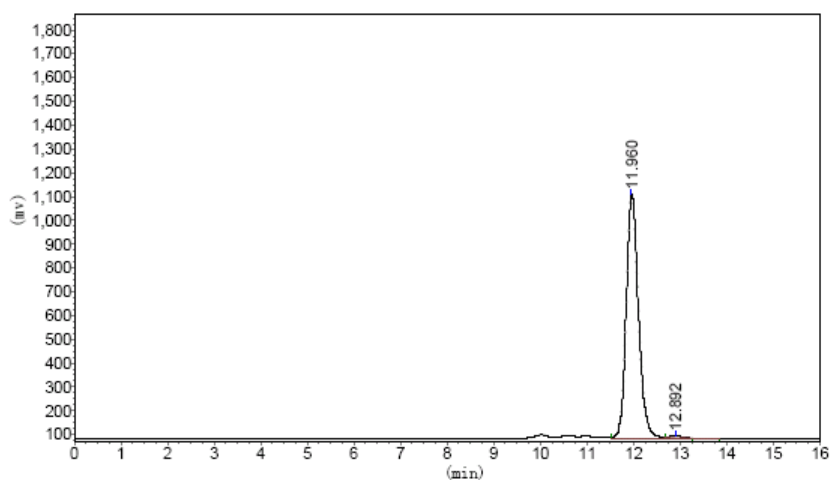

| Peak No.     | R. Time | Peak Height | Peak Area    | Percent  |
|--------------|---------|-------------|--------------|----------|
| 1            | 11.960  | 1028453.063 | 19056458.000 | 99.3293  |
| 2            | 12.892  | 7947.363    | 128667.750   | 0.6707   |
| <b>Total</b> |         | 1036400.426 | 19185125.750 | 100.0000 |

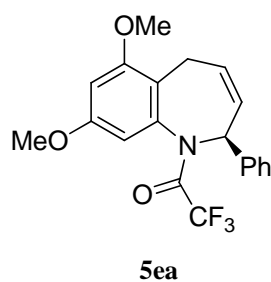

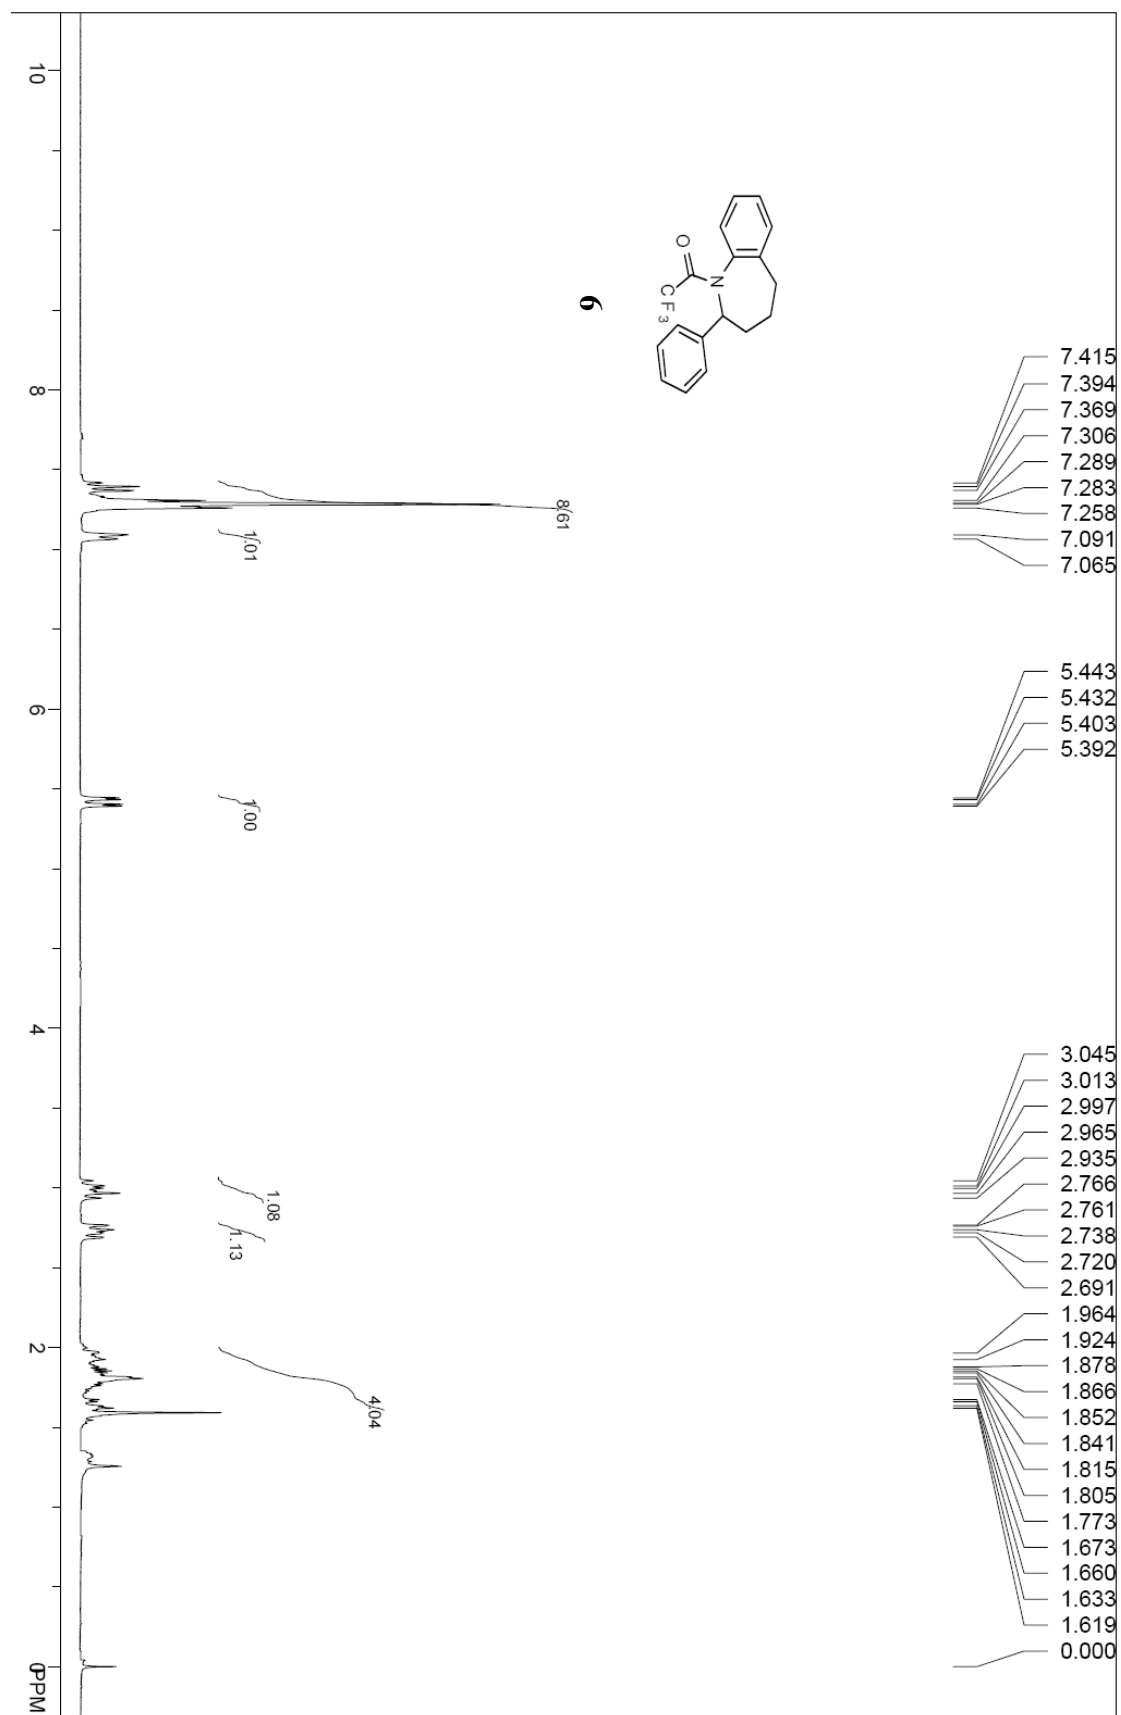

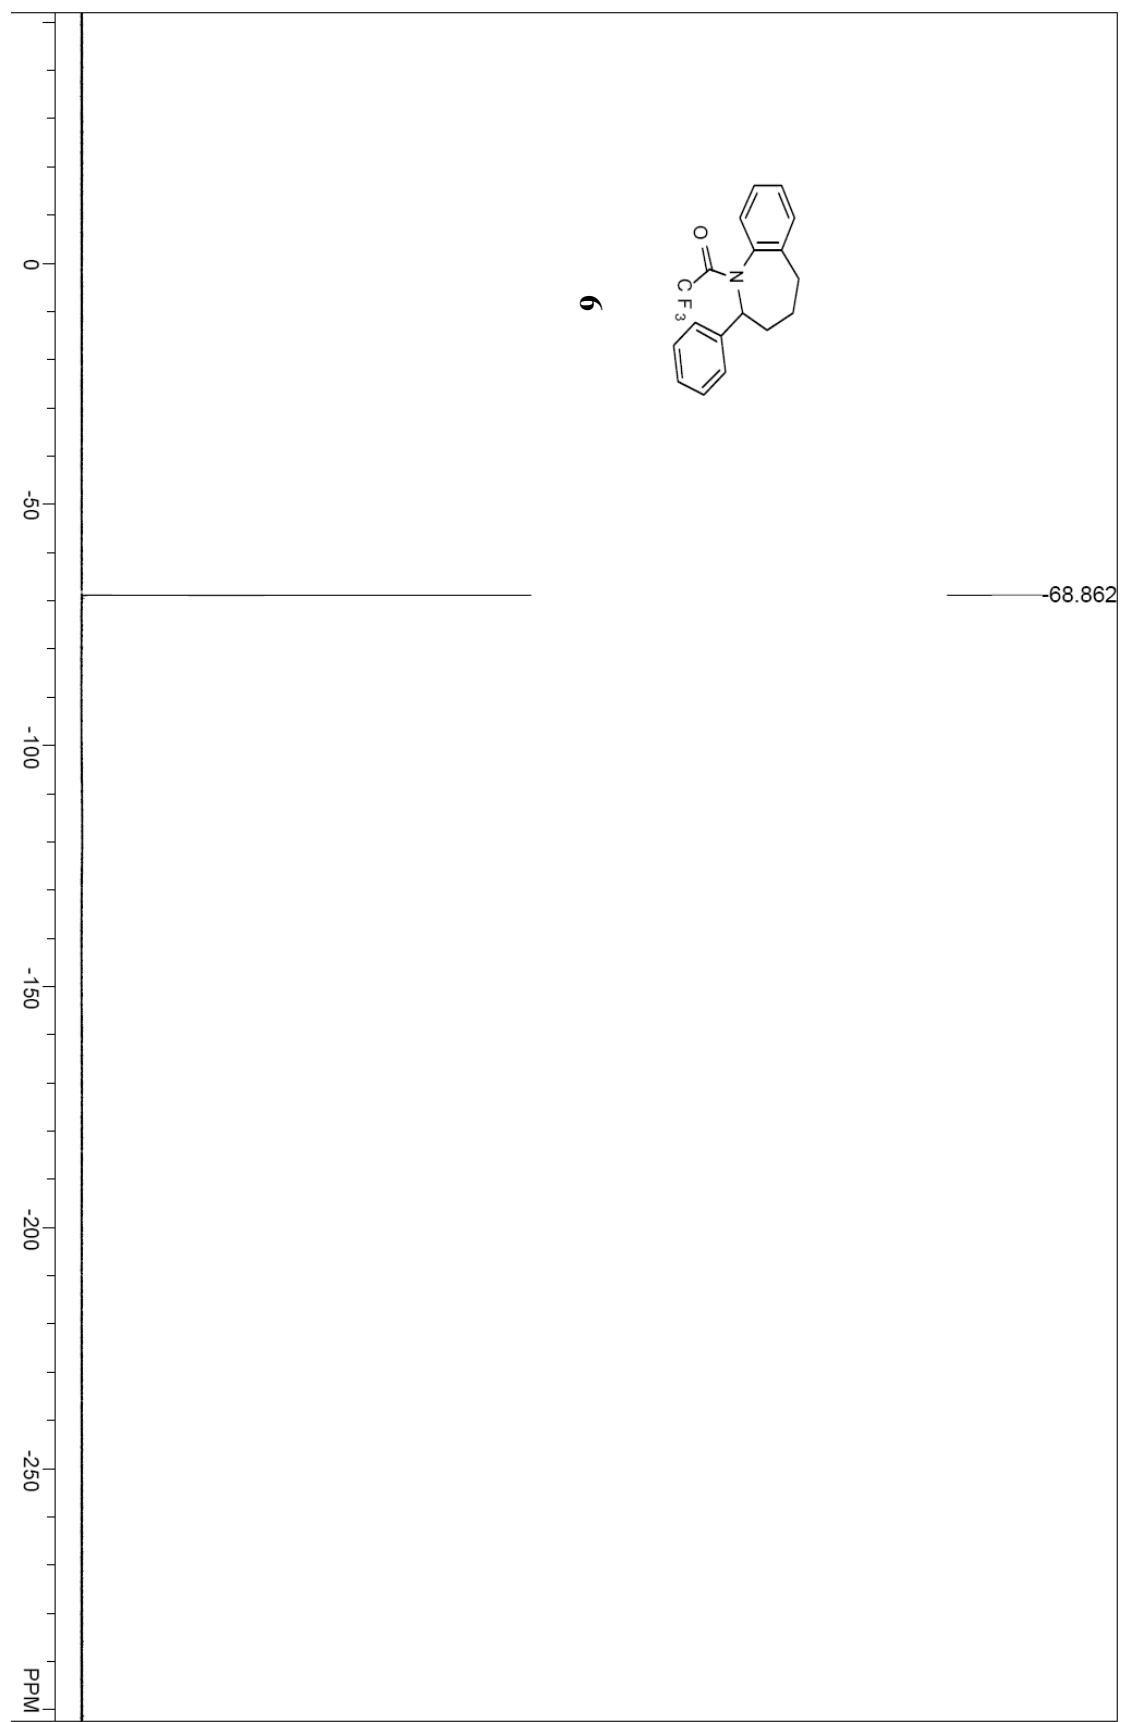



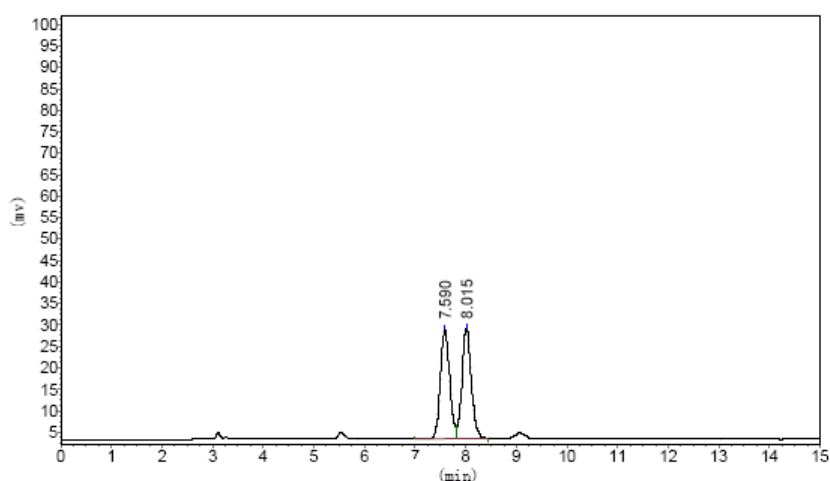

| Peak No.     | R. Time | Peak Height | Peak Area  | Percent  |
|--------------|---------|-------------|------------|----------|
| 1            | 7.590   | 25437.852   | 327374.219 | 50.0403  |
| 2            | 8.015   | 25617.674   | 326846.844 | 49.9597  |
| <b>Total</b> |         | 51055.525   | 654221.063 | 100.0000 |

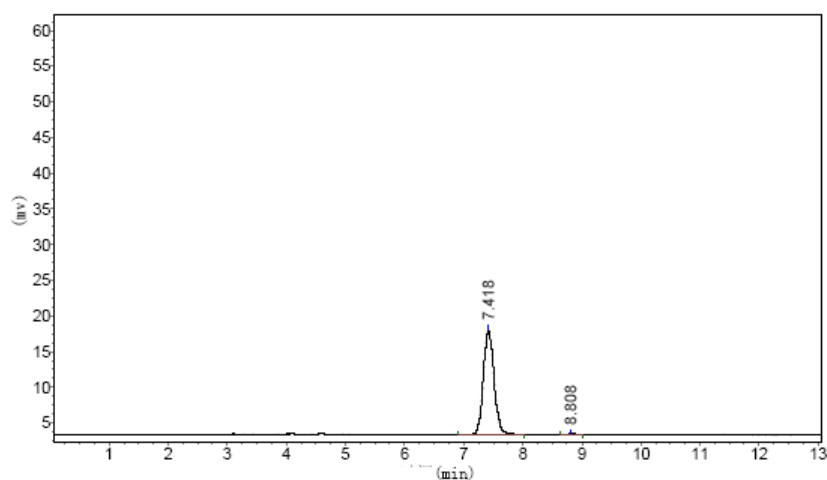

| Peak No.     | R. Time | Peak Height | Peak Area  | Percent  |
|--------------|---------|-------------|------------|----------|
| 1            | 7.418   | 14692.846   | 186368.797 | 99.3313  |
| 2            | 8.808   | 101.029     | 1254.557   | 0.6687   |
| <b>Total</b> |         | 14793.875   | 187623.354 | 100.0000 |

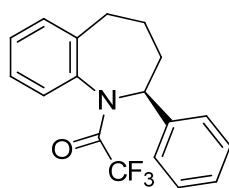

6

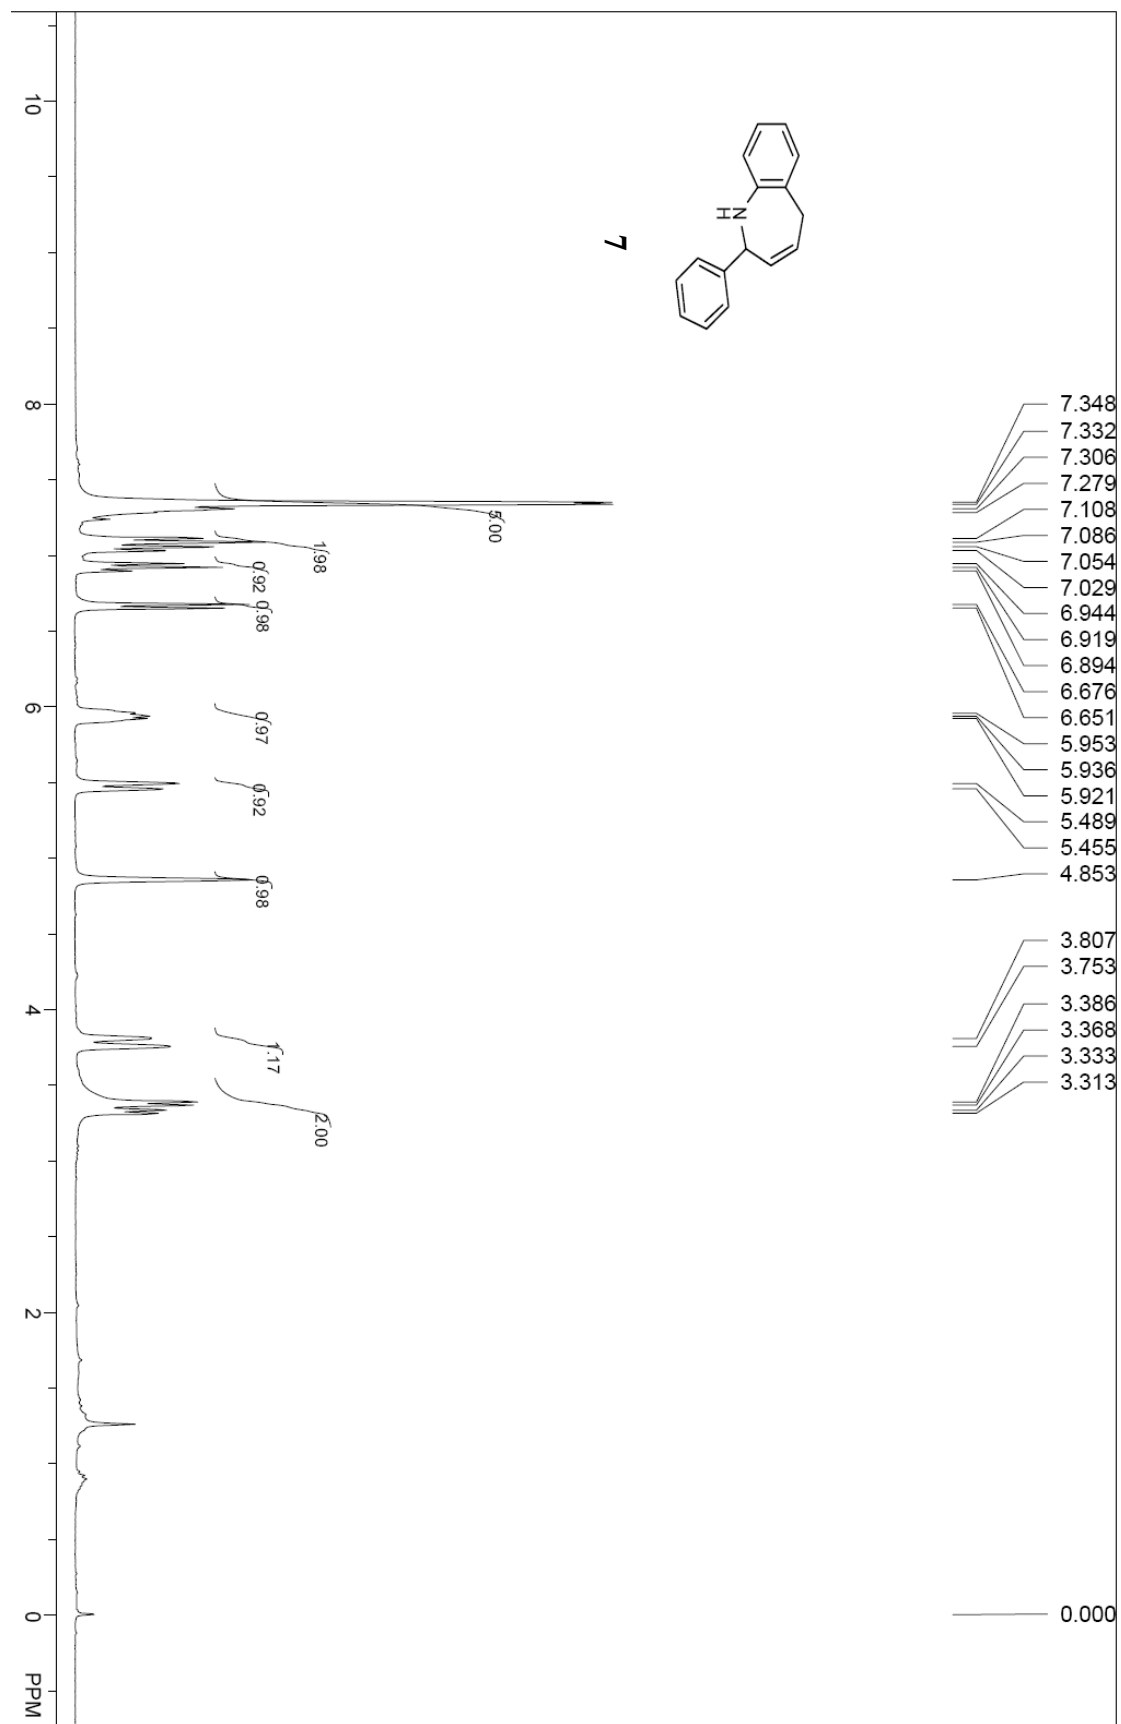

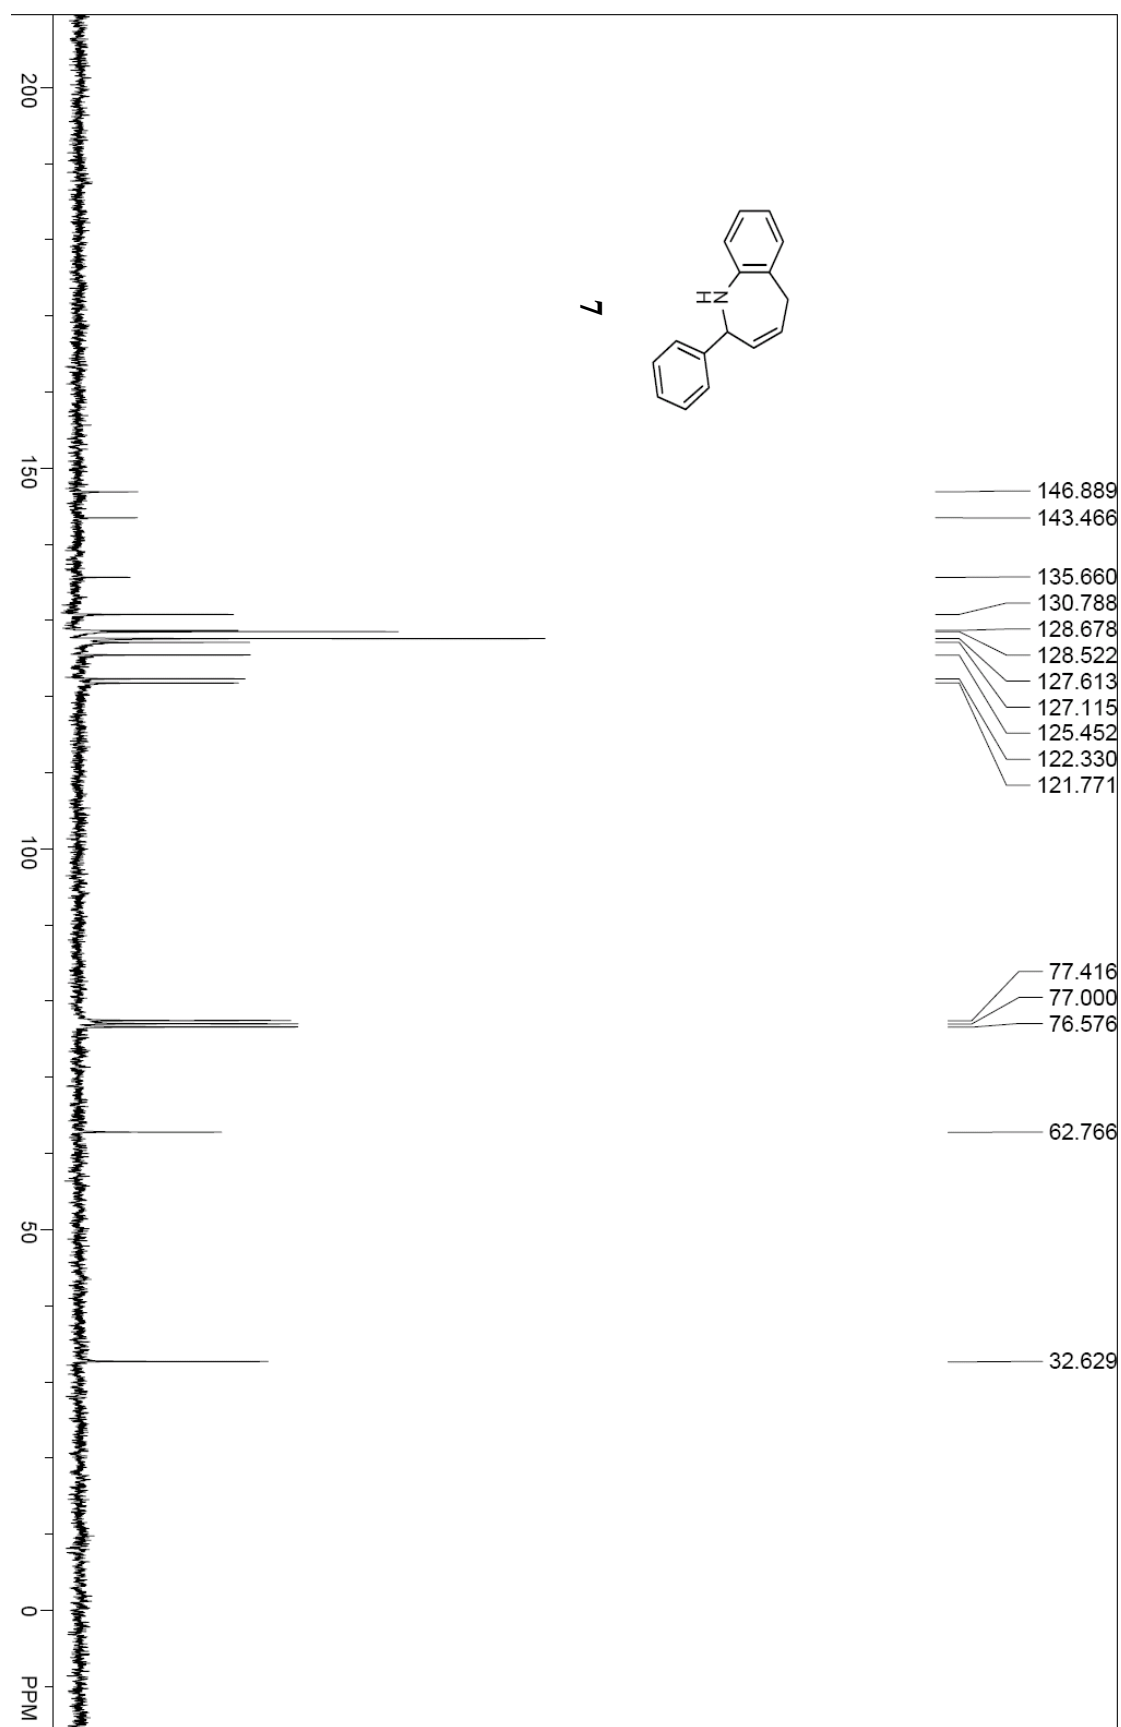

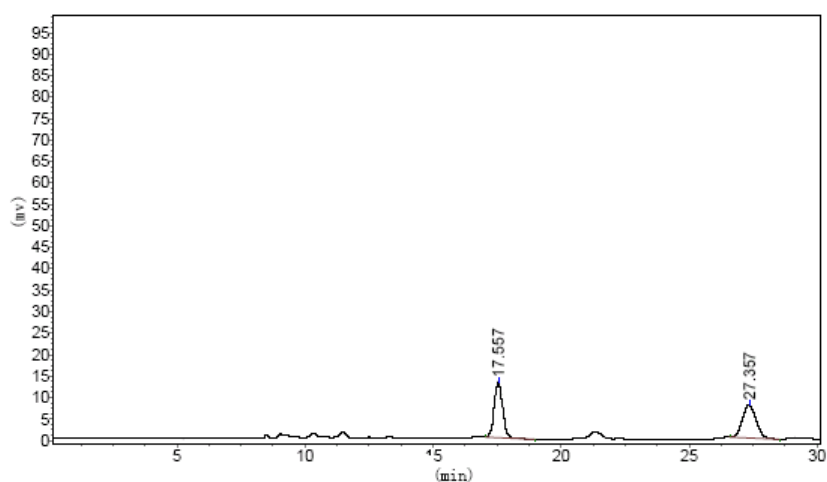

| Peak No.     | R. Time | Peak Height | Peak Area  | Percent  |
|--------------|---------|-------------|------------|----------|
| 1            | 17.557  | 13213.888   | 314068.531 | 50.3326  |
| 2            | 27.357  | 7945.072    | 309918.094 | 49.6674  |
| <b>Total</b> |         | 21158.960   | 623986.625 | 100.0000 |

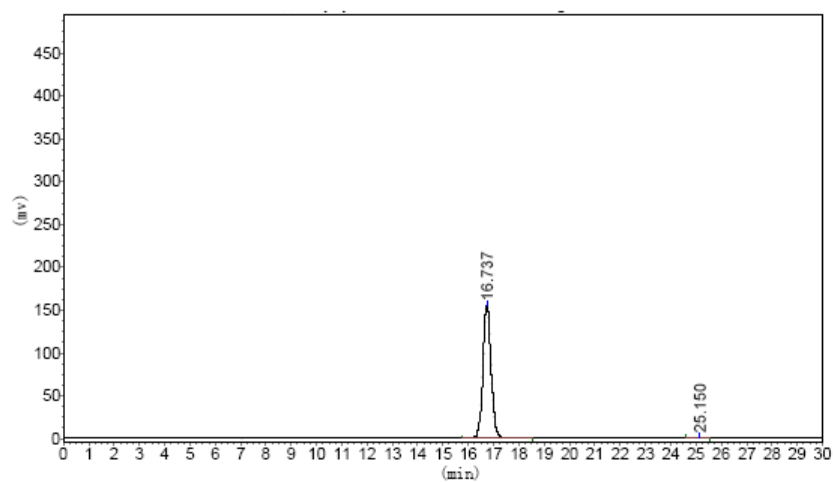

| Peak No.     | R. Time | Peak Height | Peak Area   | Percent  |
|--------------|---------|-------------|-------------|----------|
| 1            | 16.737  | 155285.125  | 3490408.000 | 99.4191  |
| 2            | 25.150  | 719.275     | 20394.299   | 0.5809   |
| <b>Total</b> |         | 156004.400  | 3510802.299 | 100.0000 |

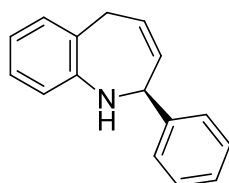

7

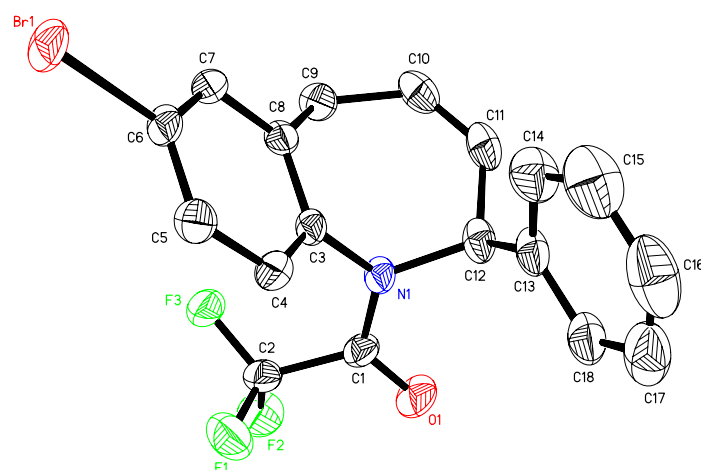

Table 1. Crystal data and structure refinement for (*S*)-**5ca**

|                                   |                                                                                                                  |
|-----------------------------------|------------------------------------------------------------------------------------------------------------------|
| Identification code               | [CCDC 859342]                                                                                                    |
| Empirical formula                 | C <sub>18</sub> H <sub>13</sub> Br F <sub>3</sub> N O                                                            |
| Formula weight                    | 396.20                                                                                                           |
| Temperature                       | 293(2) K                                                                                                         |
| Wavelength                        | 0.71073 Å                                                                                                        |
| Crystal system, space group       | Orthorhombic, P2(1)2(1)2(1)                                                                                      |
| Unit cell dimensions              | a = 8.2256(14) Å    alpha = 90 deg.<br>b = 11.0205(18) Å    beta = 90 deg.<br>c = 18.212(3) Å    gamma = 90 deg. |
| Volume                            | 1650.9(5) Å <sup>3</sup>                                                                                         |
| Z, Calculated density             | 4, 1.594 Mg/m <sup>3</sup>                                                                                       |
| Absorption coefficient            | 2.525 mm <sup>-1</sup>                                                                                           |
| F(000)                            | 792                                                                                                              |
| Crystal size                      | 0.369 x 0.311 x 0.257 mm                                                                                         |
| Theta range for data collection   | 2.16 to 25.99 deg.                                                                                               |
| Limiting indices                  | -10 ≤ h ≤ 9, -13 ≤ k ≤ 11, -21 ≤ l ≤ 22                                                                          |
| Reflections collected / unique    | 8973 / 3202 [R(int) = 0.0275]                                                                                    |
| Completeness to theta = 25.99     | 99.7 %                                                                                                           |
| Absorption correction             | Empirical                                                                                                        |
| Max. and min. transmission        | 1.00000 and 0.57501                                                                                              |
| Refinement method                 | Full-matrix least-squares on F <sup>2</sup>                                                                      |
| Data / restraints / parameters    | 3202 / 5 / 218                                                                                                   |
| Goodness-of-fit on F <sup>2</sup> | 1.038                                                                                                            |
| Final R indices [I > 2sigma(I)]   | R1 = 0.0302, wR2 = 0.0719                                                                                        |
| R indices (all data)              | R1 = 0.0382, wR2 = 0.0751                                                                                        |
| Absolute structure parameter      | 0.022(8)                                                                                                         |
| Extinction coefficient            | 0.0035(7)                                                                                                        |
| Largest diff. peak and hole       | 0.389 and -0.259 e.Å <sup>-3</sup>                                                                               |
